# Supplementary material for: Magnetic silicon fullerene
Source: Royal Society of Chemistry journal article supplement (doi:10.1039/b923865d), 2010-01-01
Supplement: b923865d.pdf [file b923865d.pdf]

## Part I: Frequency Analysis of $D_{2h}$ -Eu@Si<sub>20</sub>

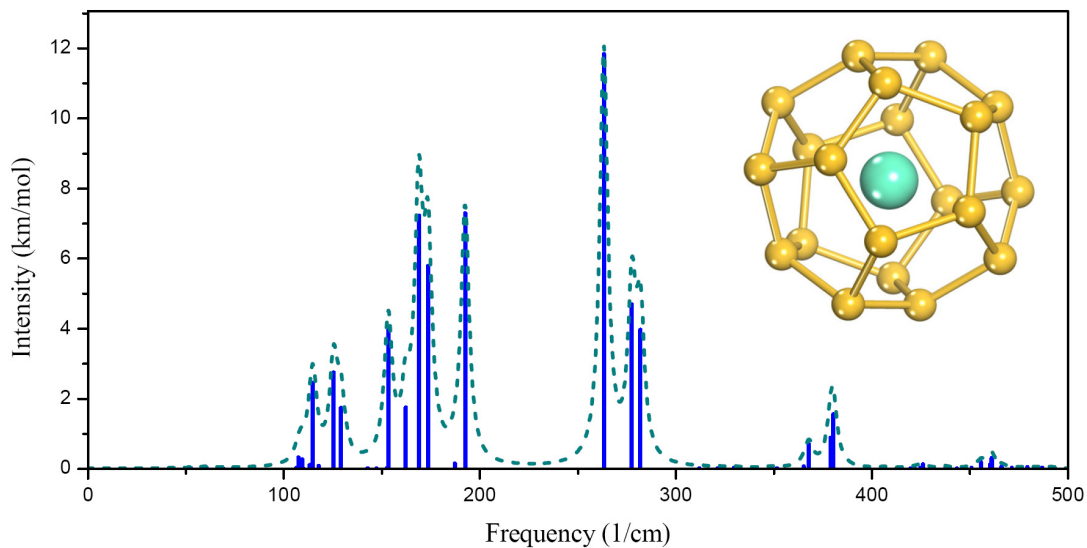

The frequency spectrum of  $D_{2h}$ -Eu@Si<sub>20</sub> obtained at the PW91 level. The insert is the stable  $D_{2h}$ -Eu@Si<sub>20</sub> fullerene cage. Large ball: Eu atom, small ball: Si atom.

## Part II: *Ab Initio* Molecular Dynamics

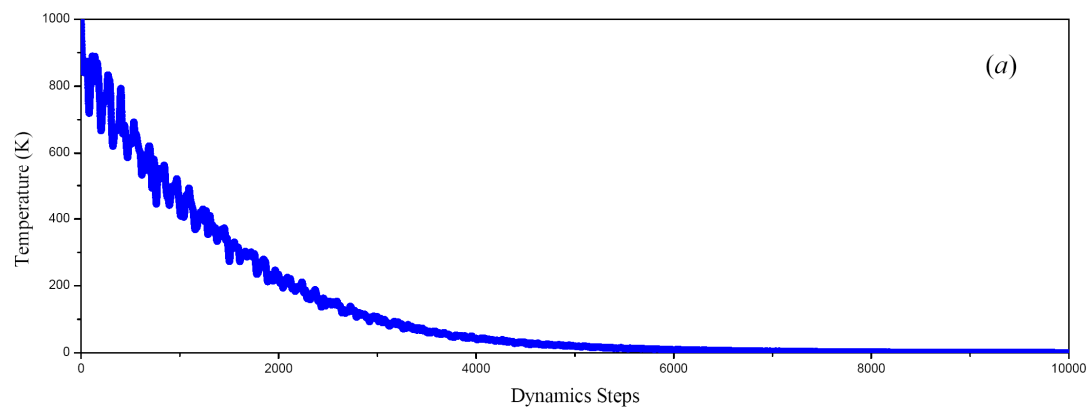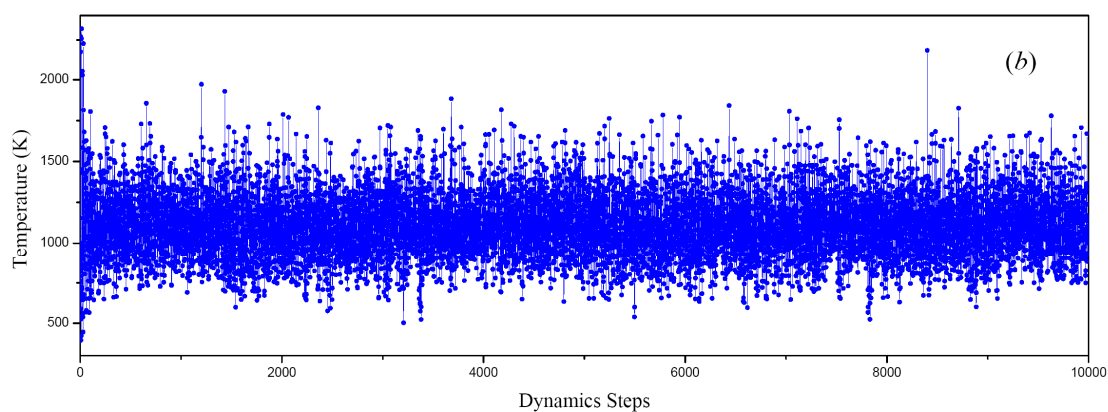

The temperature vs dynamics steps of the molecular dynamics imposed on (a)  $I_h$ -Eu@Si<sub>20</sub> with a Gaussian thermostat and an initial temperature of 1000 K and (b)  $D_{2h}$ -Eu@Si<sub>20</sub> with a Massive Nosé-Hoover thermostat and an average temperature of 1000 K at the PW91 level. The *ab initio* molecular dynamics is in the constant-NVT ensemble, a time step of 1.0 femtosecond, 10000 dynamics steps.

## Part III: xyz Coordinates for Stationary Points

### 1. For structures in Table 1

| RbSi <sub>20</sub> |        |        |        |        |        |        |
|--------------------|--------|--------|--------|--------|--------|--------|
| Cage               | PW91   |        |        | BLYP   |        |        |
| Si                 | 2.669  | -1.094 | -1.565 | 2.705  | -1.107 | -1.584 |
| Si                 | 2.988  | 1.089  | -0.788 | 3.029  | 1.107  | -0.798 |
| Si                 | 0.808  | -1.087 | -2.983 | 0.821  | -1.103 | -3.024 |
| Si                 | -0.015 | 1.099  | -3.087 | -0.017 | 1.113  | -3.131 |
| Si                 | 1.333  | 2.447  | -1.730 | 1.350  | 2.479  | -1.756 |
| Si                 | -0.840 | -2.441 | -2.024 | -0.852 | -2.474 | -2.050 |
| Si                 | -2.685 | -1.090 | -1.531 | -2.722 | -1.103 | -1.553 |
| Si                 | -2.177 | 1.096  | -2.192 | -2.206 | 1.113  | -2.221 |
| Si                 | -0.002 | -3.277 | -0.005 | -0.003 | -3.322 | -0.005 |
| Si                 | -1.333 | -2.447 | 1.730  | -1.350 | -2.479 | 1.756  |
| Si                 | -2.988 | -1.089 | 0.788  | -3.029 | -1.107 | 0.798  |
| Si                 | 2.165  | -2.443 | 0.279  | 2.194  | -2.478 | 0.282  |
| Si                 | 2.177  | -1.096 | 2.192  | 2.206  | -1.113 | 2.221  |
| Si                 | 0.016  | -1.099 | 3.087  | 0.017  | -1.113 | 3.131  |
| Si                 | 2.686  | 1.090  | 1.531  | 2.722  | 1.103  | 1.553  |
| Si                 | 0.840  | 2.441  | 2.024  | 0.852  | 2.474  | 2.050  |
| Si                 | -0.808 | 1.087  | 2.983  | -0.820 | 1.103  | 3.024  |
| Si                 | -2.668 | 1.094  | 1.564  | -2.704 | 1.107  | 1.584  |
| Si                 | -2.165 | 2.444  | -0.280 | -2.194 | 2.478  | -0.282 |
| Si                 | 0.002  | 3.277  | 0.005  | 0.003  | 3.322  | 0.005  |
| Rb                 | 0.000  | 0.000  | 0.000  | 0.000  | -0.000 | 0.000  |
| No.1               | PW91   |        |        | BLYP   |        |        |
| Si                 | 2.162  | 1.390  | -2.063 | 2.203  | 1.410  | -2.045 |
| Si                 | -1.223 | 4.382  | 1.850  | -1.258 | 4.474  | 1.878  |
| Si                 | -0.174 | 1.685  | -1.670 | -0.165 | 1.728  | -1.761 |
| Si                 | -2.237 | 0.850  | 1.173  | -2.306 | 0.914  | 1.139  |
| Si                 | -0.455 | 2.146  | 2.008  | -0.540 | 2.190  | 2.104  |
| Si                 | -1.410 | 3.673  | -2.003 | -1.413 | 3.761  | -2.021 |
| Si                 | 1.629  | 2.236  | 0.099  | 1.649  | 2.320  | 0.113  |
| Si                 | 1.784  | 1.383  | 2.310  | 1.728  | 1.378  | 2.312  |
| Si                 | 0.117  | 4.026  | -0.131 | 0.122  | 4.131  | -0.131 |
| Si                 | -2.184 | 2.992  | 0.153  | -2.249 | 3.098  | 0.157  |
| Si                 | -0.800 | -0.404 | -0.404 | -0.833 | -0.400 | -0.452 |
| Si                 | 2.677  | -2.379 | 0.483  | 2.721  | -2.449 | 0.511  |
| Si                 | -1.363 | -2.795 | -0.223 | -1.379 | -2.846 | -0.196 |
| Si                 | 1.654  | -0.790 | -1.221 | 1.745  | -0.853 | -1.258 |
| Si                 | -0.292 | -4.262 | -1.865 | -0.369 | -4.303 | -1.896 |
| Si                 | -0.265 | -1.806 | -2.378 | -0.244 | -1.844 | -2.408 |
| Si                 | 0.906  | -4.090 | 0.288  | 0.940  | -4.226 | 0.270  |
| Si                 | -0.054 | -2.562 | 1.807  | 0.005  | -2.678 | 1.843  |
| Si                 | 2.057  | -3.080 | -1.822 | 2.147  | -3.166 | -1.864 |
| Si                 | 1.121  | -0.584 | 1.178  | 1.092  | -0.636 | 1.151  |
| Rb                 | -3.655 | -2.014 | 2.432  | -3.599 | -2.007 | 2.556  |
| No.2               | PW91   |        |        | BLYP   |        |        |
| Si                 | -1.520 | 3.485  | 2.953  | -1.573 | 3.531  | 2.977  |
| Si                 | -1.122 | 2.791  | -1.308 | -1.096 | 2.835  | -1.345 |
| Si                 | -3.417 | 2.122  | -0.812 | -3.433 | 2.172  | -0.847 |
| Si                 | -0.607 | 1.464  | 2.060  | -0.628 | 1.498  | 2.062  |
| Si                 | -1.287 | 5.107  | -0.502 | -1.332 | 5.179  | -0.499 |
| Si                 | 0.922  | 2.142  | 0.129  | 0.999  | 2.305  | 0.182  |
| Si                 | 1.722  | 0.798  | 2.006  | 1.727  | 0.821  | 2.043  |
| Si                 | -0.041 | 4.005  | 1.184  | -0.049 | 4.142  | 1.239  |
| Si                 | -2.660 | 3.721  | 0.824  | -2.753 | 3.804  | 0.830  |
| Si                 | -0.713 | -1.190 | -0.586 | -0.728 | -1.218 | -0.567 |
| Si                 | 2.969  | -2.525 | -0.416 | 3.004  | -2.545 | -0.490 |
| Si                 | -0.724 | -2.640 | 1.430  | -0.715 | -2.725 | 1.451  |
| Si                 | 1.466  | -1.138 | -1.730 | 1.425  | -1.217 | -1.822 |
| No.3               | PW91   |        |        | BLYP   |        |        |
| Si                 | -0.866 | 2.093  | -1.508 | -0.931 | 2.087  | -1.640 |
| Si                 | -2.960 | 1.582  | 1.796  | -3.035 | 1.634  | 1.793  |
| Si                 | -0.682 | 1.555  | 1.209  | -0.732 | 1.588  | 1.259  |
| Si                 | -1.510 | 4.359  | -1.463 | -1.603 | 4.381  | -1.465 |
| Si                 | 1.399  | 2.028  | -0.202 | 1.374  | 2.142  | -0.144 |
| Si                 | 1.481  | 0.977  | 1.964  | 1.452  | 0.980  | 1.998  |
| Si                 | 0.155  | 3.996  | 0.282  | 0.098  | 4.138  | 0.249  |
| Si                 | -2.268 | 3.637  | 0.712  | -2.274 | 3.817  | 0.871  |
| Si                 | -0.947 | -1.343 | -0.176 | -0.966 | -1.399 | -0.238 |
| Si                 | 3.193  | -1.785 | -0.525 | 3.239  | -1.847 | -0.509 |
| Si                 | -1.784 | -3.662 | -0.343 | -1.793 | -3.751 | -0.423 |
| Si                 | 1.016  | -0.895 | -1.530 | 1.057  | -0.937 | -1.570 |
| Si                 | 0.460  | -4.546 | -0.474 | 0.484  | -4.669 | -0.486 |
| Si                 | -0.438 | -2.713 | -2.289 | -0.381 | -2.792 | -2.382 |
| Si                 | 2.125  | -3.506 | 0.940  | 2.139  | -3.589 | 0.983  |
| Si                 | -0.190 | -2.992 | 1.653  | -0.215 | -3.063 | 1.671  |
| Si                 | 1.898  | -3.311 | -1.954 | 1.973  | -3.429 | -1.974 |
| Si                 | 1.223  | -1.147 | 0.931  | 1.217  | -1.185 | 0.943  |
| Si                 | -2.324 | 0.587  | -0.357 | -2.310 | 0.593  | -0.351 |
| Si                 | 1.223  | 1.298  | -2.461 | 1.241  | 1.345  | -2.440 |
| Rb                 | -0.208 | 3.790  | 3.795  | -0.036 | 3.958  | 3.854  |
| No.4               | PW91   |        |        | BLYP   |        |        |
| Si                 | -4.011 | 1.789  | -0.068 | -3.982 | 1.806  | -0.093 |
| Si                 | -0.451 | 1.769  | 1.769  | -0.460 | 1.807  | 1.861  |
| Si                 | -1.371 | 5.180  | -0.206 | -1.346 | 5.258  | -0.300 |
| Si                 | 1.566  | 1.866  | 0.139  | 1.599  | 1.971  | 0.169  |
| Si                 | 1.729  | 0.873  | 2.331  | 1.779  | 0.913  | 2.359  |
| Si                 | 0.334  | 3.784  | 0.420  | 0.344  | 3.890  | 0.502  |
| Si                 | -2.458 | 3.327  | 0.719  | -2.513 | 3.473  | 0.702  |
| Si                 | -1.020 | -1.228 | -0.024 | -1.000 | -1.266 | 0.059  |
| Si                 | 2.931  | -2.147 | -0.215 | 2.974  | -2.205 | -0.236 |
| Si                 | -1.028 | -3.311 | 1.148  | -1.087 | -3.460 | 1.077  |
| Si                 | 1.118  | -0.880 | -1.321 | 1.148  | -0.904 | -1.349 |
| Si                 | -0.003 | -4.322 | -0.721 | 0.028  | -4.429 | -0.783 |
| Si                 | -0.745 | -2.459 | -2.142 | -0.790 | -2.479 | -2.125 |
| Si                 | 2.399  | -4.676 | -0.474 | 2.441  | -4.755 | -0.434 |
| Si                 | 1.336  | -3.517 | 1.420  | 1.314  | -3.594 | 1.459  |
| Si                 | 1.619  | -3.038 | -2.299 | 1.623  | -3.070 | -2.395 |
| Si                 | 1.147  | -1.134 | 1.145  | 1.223  | -1.164 | 1.175  |
| Si                 | -2.215 | 0.646  | 0.715  | -2.200 | 0.654  | 0.757  |
| Si                 | 1.722  | 1.243  | -2.123 | 1.657  | 1.297  | -2.113 |
| Si                 | -1.007 | 4.009  | 2.525  | -1.056 | 4.053  | 2.598  |
| Rb                 | -1.593 | 2.229  | -2.742 | -1.697 | 2.204  | -2.891 |
| No.5               | PW91   |        |        | BLYP   |        |        |
| Si                 | -0.818 | 1.392  | 1.683  | -0.833 | 1.442  | 1.761  |
| Si                 | -0.722 | 4.140  | -0.665 | -0.788 | 4.262  | -0.661 |
| Si                 | 1.259  | 2.120  | 0.272  | 1.378  | 2.170  | 0.293  |
| Si                 | 1.347  | 0.746  | 2.306  | 1.371  | 0.754  | 2.314  |
| Si                 | 1.311  | 4.524  | 0.617  | 1.259  | 4.592  | 0.670  |
| Si                 | -2.569 | 4.368  | 0.695  | -2.644 | 4.505  | 0.715  |

Part III: xyz Coordinates for Stationary Points

|       |        |        |        |        |        |        |
|-------|--------|--------|--------|--------|--------|--------|
| Si    | -1.090 | -1.328 | -0.185 | -1.057 | -1.345 | -0.226 |
| Si    | 2.966  | -2.028 | -0.367 | 3.011  | -2.091 | -0.400 |
| Si    | -0.734 | -3.239 | 1.251  | -0.735 | -3.272 | 1.279  |
| Si    | 1.027  | -0.879 | -1.395 | 1.089  | -0.890 | -1.428 |
| Si    | 0.100  | -4.465 | -0.655 | 0.113  | -4.605 | -0.613 |
| Si    | -0.814 | -2.768 | -2.100 | -0.928 | -2.954 | -2.038 |
| Si    | 2.536  | -4.614 | -0.742 | 2.568  | -4.671 | -0.844 |
| Si    | 1.646  | -3.556 | 1.325  | 1.702  | -3.649 | 1.379  |
| Si    | 1.558  | -3.015 | -2.366 | 1.471  | -3.070 | -2.441 |
| Si    | 1.075  | -1.238 | 1.025  | 1.119  | -1.298 | 1.046  |
| Si    | -2.433 | 0.573  | 0.128  | -2.382 | 0.605  | 0.108  |
| Si    | 1.247  | 1.390  | -2.070 | 1.301  | 1.443  | -2.062 |
| Si    | -0.655 | 3.774  | 1.837  | -0.748 | 3.858  | 1.892  |
| Si    | -0.886 | 1.813  | -1.195 | -0.887 | 1.918  | -1.257 |
| Rb    | -5.355 | 2.294  | 0.601  | -5.383 | 2.297  | 0.511  |
| No.6  | PW91   |        |        | BLYP   |        |        |
| Si    | -1.138 | 4.465  | -1.330 | -1.220 | 4.508  | -1.399 |
| Si    | 1.592  | 1.842  | 0.277  | 1.625  | 1.951  | 0.256  |
| Si    | 1.939  | 0.708  | 2.313  | 1.900  | 0.769  | 2.309  |
| Si    | 0.363  | 3.758  | 0.548  | 0.364  | 3.876  | 0.474  |
| Si    | -2.447 | 3.371  | 0.383  | -2.497 | 3.509  | 0.454  |
| Si    | -1.011 | -1.206 | -0.037 | -1.000 | -1.227 | -0.050 |
| Si    | 2.902  | -2.179 | -0.401 | 2.938  | -2.241 | -0.388 |
| Si    | -1.049 | -3.328 | 1.060  | -1.150 | -3.440 | 0.924  |
| Si    | 1.042  | -0.858 | -1.417 | 1.085  | -0.899 | -1.473 |
| Si    | -0.041 | -4.288 | -0.833 | 0.018  | -4.408 | -0.898 |
| Si    | -0.840 | -2.403 | -2.199 | -0.841 | -2.472 | -2.236 |
| Si    | 2.353  | -4.685 | -0.606 | 2.412  | -4.767 | -0.486 |
| Si    | 1.318  | -3.524 | 1.288  | 1.243  | -3.578 | 1.355  |
| Si    | 1.530  | -2.999 | -2.458 | 1.590  | -3.059 | -2.540 |
| Si    | 1.229  | -1.139 | 1.049  | 1.264  | -1.160 | 1.060  |
| Si    | -2.250 | 0.765  | -0.275 | -2.250 | 0.773  | -0.267 |
| Si    | 1.558  | 1.383  | -2.086 | 1.571  | 1.413  | -2.122 |
| Si    | -1.265 | 4.975  | 1.606  | -1.218 | 5.048  | 1.695  |
| Si    | -0.552 | 2.112  | -1.164 | -0.592 | 2.155  | -1.231 |
| Si    | -3.962 | 1.689  | 0.897  | -3.914 | 1.705  | 0.998  |
| Rb    | -1.274 | 1.539  | 3.387  | -1.332 | 1.542  | 3.568  |
| No.7  | PW91   |        |        | BLYP   |        |        |
| Si    | 0.634  | 2.069  | 0.445  | 0.751  | 2.119  | 0.477  |
| Si    | 1.122  | 0.689  | 2.393  | 1.135  | 0.690  | 2.434  |
| Si    | 0.304  | 4.417  | 0.979  | 0.276  | 4.476  | 0.991  |
| Si    | -1.779 | 3.811  | -0.192 | -1.860 | 3.891  | -0.203 |
| Si    | -1.207 | -1.569 | 0.045  | -1.185 | -1.614 | 0.045  |
| Si    | 2.896  | -1.683 | -0.597 | 2.947  | -1.733 | -0.584 |
| Si    | -0.417 | -3.503 | 1.256  | -0.471 | -3.639 | 1.200  |
| Si    | 0.705  | -0.851 | -1.369 | 0.750  | -0.877 | -1.388 |
| Si    | 0.418  | -4.528 | -0.757 | 0.437  | -4.665 | -0.812 |
| Si    | -0.900 | -2.906 | -1.957 | -0.916 | -2.994 | -1.971 |
| Si    | 2.830  | -4.266 | -1.054 | 2.876  | -4.333 | -1.056 |
| Si    | 1.987  | -3.459 | 1.142  | 1.985  | -3.565 | 1.197  |
| Si    | 1.444  | -2.808 | -2.528 | 1.464  | -2.853 | -2.602 |
| Si    | 1.063  | -1.248 | 1.017  | 1.106  | -1.303 | 1.051  |
| Si    | -2.889 | -0.007 | 0.606  | -2.856 | 0.016  | 0.612  |
| Si    | 0.409  | 1.418  | -1.900 | 0.456  | 1.446  | -1.870 |
| Si    | -1.420 | 3.360  | 2.251  | -1.479 | 3.443  | 2.288  |
| Si    | -1.639 | 1.490  | -0.763 | -1.664 | 1.556  | -0.809 |
| Si    | -3.512 | 3.831  | 1.350  | -3.577 | 4.008  | 1.384  |
| Si    | -1.180 | 0.982  | 1.958  | -1.199 | 1.035  | 2.050  |
| Rb    | 1.131  | 4.761  | -2.325 | 1.022  | 4.895  | -2.433 |
| No.8  | PW91   |        |        | BLYP   |        |        |
| Si    | 0.501  | 0.316  | 3.028  | 0.553  | 0.336  | 3.042  |
| Si    | 0.300  | 3.210  | -0.324 | 0.313  | 3.413  | -0.371 |
| Si    | -2.183 | 3.747  | 0.517  | -2.225 | 3.875  | 0.542  |
| Si    | -1.310 | -1.272 | -0.255 | -1.275 | -1.297 | -0.245 |
| Si    | 2.733  | -1.795 | 0.055  | 2.785  | -1.866 | 0.062  |
| Si    | -1.053 | -3.373 | 0.894  | -1.114 | -3.483 | 0.822  |
| Si    | 0.906  | -0.553 | -1.101 | 0.976  | -0.595 | -1.134 |
| Si    | 0.147  | -4.256 | -0.993 | 0.151  | -4.388 | -1.043 |
| Si    | -0.660 | -2.392 | -2.289 | -0.684 | -2.471 | -2.306 |
| Si    | 2.549  | -4.336 | -0.694 | 2.570  | -4.441 | -0.668 |
| Si    | 1.319  | -3.541 | 1.313  | 1.284  | -3.648 | 1.360  |
| Si    | 1.745  | -2.510 | -2.231 | 1.779  | -2.584 | -2.301 |
| Si    | 0.629  | -1.229 | 1.256  | 0.678  | -1.282 | 1.280  |
| Si    | -2.389 | 0.803  | -0.132 | -2.374 | 0.802  | -0.116 |
| Si    | 1.074  | 1.648  | -2.054 | 1.071  | 1.693  | -2.067 |
| Si    | -0.309 | 3.903  | 1.921  | -0.344 | 3.983  | 1.964  |
| Si    | -1.300 | 1.970  | -1.865 | -1.309 | 2.013  | -1.859 |
| Si    | -3.450 | 1.950  | 1.638  | -3.505 | 1.982  | 1.616  |
| Si    | -1.036 | 1.606  | 1.780  | -1.083 | 1.664  | 1.918  |
| Si    | -1.409 | 4.301  | -1.640 | -1.496 | 4.374  | -1.680 |
| Rb    | 3.190  | 1.803  | 1.174  | 3.244  | 1.921  | 1.183  |
| No.9  | PW91   |        |        | BLYP   |        |        |
| Si    | 0.984  | 4.484  | 0.587  | 0.806  | 4.791  | 0.462  |
| Si    | -2.839 | 3.619  | 0.863  | -3.029 | 3.789  | 0.662  |
| Si    | -1.159 | -1.302 | -0.318 | -1.023 | -1.330 | -0.079 |
| Si    | 2.668  | -2.132 | 0.222  | 2.811  | -2.387 | 0.125  |
| Si    | -1.358 | -3.408 | 0.770  | -1.297 | -3.578 | 0.760  |
| Si    | 1.072  | -0.904 | -1.154 | 1.187  | -0.953 | -1.057 |
| Si    | -0.021 | -4.375 | -0.958 | -0.062 | -4.483 | -1.114 |
| Si    | -0.518 | -2.464 | -2.388 | -0.614 | -2.395 | -2.306 |
| Si    | 2.285  | -4.701 | -0.285 | 2.294  | -4.910 | -0.580 |
| Si    | 0.925  | -3.559 | 1.402  | 1.039  | -3.902 | 1.319  |
| Si    | 1.852  | -2.988 | -2.141 | 1.789  | -2.987 | -2.316 |
| Si    | 0.685  | -1.127 | 1.340  | 0.938  | -1.445 | 1.482  |
| Si    | -2.066 | 0.888  | -0.361 | -1.984 | 0.868  | -0.166 |
| Si    | 1.521  | 1.376  | -1.662 | 1.609  | 1.391  | -1.525 |
| Si    | -0.869 | 3.905  | 2.009  | -1.146 | 4.350  | 1.889  |
| Si    | -0.818 | 2.103  | -1.977 | -0.789 | 2.007  | -1.908 |
| Si    | -3.704 | 1.411  | 1.246  | -3.781 | 1.535  | 1.271  |
| Si    | -1.392 | 1.525  | 2.040  | -1.547 | 1.958  | 2.191  |
| Si    | -1.016 | 4.146  | -0.717 | -1.103 | 4.191  | -0.904 |
| Si    | 0.258  | 2.133  | 0.234  | 0.301  | 2.312  | 0.332  |
| Rb    | 3.508  | 1.367  | 1.249  | 3.599  | 1.175  | 1.462  |
| No.10 | PW91   |        |        | BLYP   |        |        |
| Si    | -1.803 | 3.606  | 0.473  | -1.941 | 3.752  | 0.513  |
| Si    | -1.200 | -1.331 | -0.372 | -1.138 | -1.362 | -0.276 |
| Si    | 2.886  | -1.975 | -0.382 | 2.925  | -2.070 | -0.348 |
| Si    | -0.875 | -2.992 | 1.331  | -1.057 | -3.302 | 1.166  |
| Si    | 0.935  | -1.035 | -1.628 | 0.986  | -1.088 | -1.653 |
| Si    | 0.035  | -4.418 | -0.364 | 0.088  | -4.542 | -0.518 |
| Si    | -0.813 | -2.964 | -2.111 | -0.800 | -2.919 | -2.192 |
| Si    | 2.464  | -4.603 | -0.293 | 2.516  | -4.661 | -0.156 |
| Si    | 1.497  | -3.184 | 1.500  | 1.337  | -3.268 | 1.550  |
| Si    | 1.585  | -3.282 | -2.222 | 1.677  | -3.352 | -2.325 |
| Si    | 0.979  | -0.954 | 0.791  | 1.078  | -0.953 | 0.832  |
| Si    | -2.170 | 0.809  | -0.303 | -2.166 | 0.788  | -0.217 |
| Si    | 1.239  | 1.188  | -2.439 | 1.219  | 1.185  | -2.471 |
| Si    | -2.195 | 3.152  | 2.762  | -2.187 | 3.270  | 2.830  |
| Si    | -0.917 | 2.008  | -1.958 | -0.953 | 1.996  | -1.937 |
| Si    | -3.672 | 2.217  | 0.899  | -3.736 | 2.218  | 0.955  |
| Si    | -1.068 | 1.373  | 1.726  | -1.047 | 1.479  | 1.794  |
| Si    | -0.246 | 4.226  | -1.205 | -0.349 | 4.262  | -1.242 |
| Si    | 1.047  | 2.329  | -0.348 | 1.140  | 2.433  | -0.403 |
| Si    | 1.305  | 1.181  | 1.787  | 1.352  | 1.267  | 1.782  |
| Rb    | 0.987  | 4.649  | 2.360  | 1.053  | 4.865  | 2.318  |
| No.11 | PW91   |        |        | BLYP   |        |        |
| Si    | -1.065 | -1.110 | -0.222 | -1.032 | -1.134 | -0.285 |
| Si    | 2.898  | -2.194 | -0.276 | 2.954  | -2.260 | -0.282 |
| Si    | -0.926 | -3.058 | 1.225  | -0.954 | -3.104 | 1.204  |
| Si    | 1.115  | -0.800 | -1.319 | 1.198  | -0.824 | -1.347 |
| Si    | -0.165 | -4.324 | -0.704 | -0.153 | -4.459 | -0.694 |
| Si    | -0.909 | -2.563 | -2.132 | -0.978 | -2.716 | -2.126 |

Part III: xyz Coordinates for Stationary Points

|       |        |        |        |        |        |        |
|-------|--------|--------|--------|--------|--------|--------|
| Si    | 2.247  | -4.701 | -0.797 | 2.283  | -4.770 | -0.858 |
| Si    | 1.422  | -3.651 | 1.324  | 1.443  | -3.738 | 1.388  |
| Si    | 1.435  | -2.949 | -2.346 | 1.418  | -3.003 | -2.421 |
| Si    | 1.036  | -1.296 | 1.090  | 1.080  | -1.347 | 1.104  |
| Si    | -2.129 | 0.955  | -0.088 | -2.103 | 0.967  | -0.110 |
| Si    | 1.650  | 1.434  | -1.960 | 1.713  | 1.481  | -1.930 |
| Si    | -1.605 | 3.931  | 1.510  | -1.603 | 4.059  | 1.601  |
| Si    | -0.423 | 2.339  | -1.075 | -0.430 | 2.388  | -1.171 |
| Si    | -2.810 | 1.870  | 2.150  | -2.869 | 1.945  | 2.158  |
| Si    | -0.574 | 1.508  | 1.710  | -0.634 | 1.494  | 1.786  |
| Si    | -0.872 | 4.631  | -0.818 | -0.907 | 4.701  | -0.856 |
| Si    | 1.688  | 1.839  | 0.387  | 1.688  | 1.953  | 0.441  |
| Si    | 1.493  | 0.608  | 2.452  | 1.485  | 0.621  | 2.485  |
| Si    | 0.663  | 3.914  | 0.839  | 0.645  | 4.050  | 0.816  |
| Rb    | -4.171 | 3.619  | -0.952 | -4.248 | 3.697  | -0.907 |
| No.12 | PW91   |        |        | BLYP   |        |        |
| Si    | 1.887  | -1.014 | 0.498  | 1.837  | -1.053 | 0.531  |
| Si    | -0.633 | -4.919 | -1.008 | -0.641 | -4.986 | -1.016 |
| Si    | 0.431  | -1.063 | -1.592 | 0.380  | -1.123 | -1.654 |
| Si    | 1.384  | -4.200 | -0.090 | 1.425  | -4.362 | -0.128 |
| Si    | 0.646  | -3.250 | -2.418 | 0.716  | -3.318 | -2.521 |
| Si    | 1.236  | -2.907 | 1.928  | 1.336  | -3.063 | 1.910  |
| Si    | -0.891 | -3.492 | 1.030  | -0.874 | -3.578 | 1.082  |
| Si    | 2.637  | -2.498 | -1.321 | 2.669  | -2.556 | -1.295 |
| Si    | -0.560 | -1.233 | 0.562  | -0.636 | -1.290 | 0.512  |
| Si    | -1.875 | 0.708  | 0.751  | -1.758 | 0.766  | 0.808  |
| Si    | 0.566  | 1.034  | -2.728 | 0.567  | 1.049  | -2.734 |
| Si    | -0.288 | 4.054  | 1.718  | -0.258 | 4.163  | 1.765  |
| Si    | -0.882 | 1.923  | -1.015 | -0.966 | 2.000  | -1.069 |
| Si    | -1.687 | 2.128  | 2.755  | -1.786 | 2.207  | 2.801  |
| Si    | 0.293  | 1.506  | 1.566  | 0.347  | 1.650  | 1.806  |
| Si    | -1.665 | 4.191  | -0.632 | -1.687 | 4.311  | -0.722 |
| Si    | 1.652  | 1.869  | -0.787 | 1.627  | 1.962  | -0.776 |
| Si    | 2.616  | 1.113  | 1.268  | 2.639  | 1.109  | 1.263  |
| Si    | 0.646  | 4.002  | -0.420 | 0.640  | 4.114  | -0.429 |
| Si    | -2.574 | 4.296  | 1.727  | -2.569 | 4.430  | 1.742  |
| Rb    | -2.937 | -2.251 | -1.793 | -3.008 | -2.434 | -1.880 |
| No.13 | PW91   |        |        | BLYP   |        |        |
| Si    | -1.012 | -3.074 | 1.299  | -1.033 | -3.139 | 1.270  |
| Si    | 1.029  | -0.902 | -1.334 | 1.127  | -0.906 | -1.355 |
| Si    | -0.122 | -4.315 | -0.644 | -0.162 | -4.470 | -0.648 |
| Si    | -0.950 | -2.821 | -2.304 | -1.033 | -2.932 | -2.289 |
| Si    | 2.166  | -4.735 | -0.755 | 2.158  | -4.725 | -0.771 |
| Si    | 1.360  | -3.547 | 1.370  | 1.347  | -3.624 | 1.484  |
| Si    | 1.422  | -2.989 | -2.313 | 1.370  | -3.024 | -2.409 |
| Si    | 0.844  | -1.278 | 1.029  | 0.951  | -1.316 | 1.030  |
| Si    | -2.092 | 0.872  | -0.364 | -2.064 | 0.881  | -0.382 |
| Si    | 1.594  | 1.315  | -1.956 | 1.647  | 1.379  | -1.949 |
| Si    | -1.074 | 4.057  | 2.508  | -1.115 | 4.144  | 2.535  |
| Si    | -0.589 | 2.221  | -1.531 | -0.600 | 2.278  | -1.588 |
| Si    | -3.481 | 1.806  | 1.226  | -3.516 | 1.795  | 1.189  |
| Si    | -1.089 | 1.696  | 1.881  | -1.159 | 1.724  | 2.018  |
| Si    | -1.072 | 4.551  | -1.397 | -1.138 | 4.637  | -1.404 |
| Si    | 1.176  | 1.823  | 0.349  | 1.181  | 1.932  | 0.360  |
| Si    | 0.992  | 0.635  | 2.429  | 1.003  | 0.666  | 2.419  |
| Si    | 0.235  | 3.969  | 0.529  | 0.208  | 4.087  | 0.534  |
| Si    | -2.322 | 3.835  | 0.535  | -2.403 | 3.918  | 0.565  |
| Si    | -1.205 | -1.302 | -0.376 | -1.144 | -1.306 | -0.409 |
| Rb    | 4.192  | -1.815 | -0.179 | 4.375  | -1.999 | -0.199 |
| No.14 | PW91   |        |        | BLYP   |        |        |
| Si    | -1.669 | 0.559  | -0.244 | -1.674 | 0.571  | -0.259 |
| Si    | 1.644  | 1.668  | -2.207 | 1.671  | 1.678  | -2.222 |
| Si    | -0.957 | 3.807  | 2.613  | -0.957 | 3.912  | 2.639  |
| Si    | -0.640 | 2.164  | -1.561 | -0.661 | 2.194  | -1.611 |
| Si    | -3.006 | 1.156  | 1.545  | -3.036 | 1.180  | 1.532  |
| Si    | -0.602 | 1.486  | 1.981  | -0.646 | 1.533  | 2.151  |
| Si    | -1.541 | 4.341  | -1.245 | -1.575 | 4.403  | -1.250 |
| Si    | 1.371  | 1.989  | 0.116  | 1.380  | 2.042  | 0.125  |
| Si    | 1.695  | 0.817  | 2.157  | 1.689  | 0.831  | 2.173  |
| Si    | 0.086  | 3.933  | 0.481  | 0.091  | 4.022  | 0.478  |
| Si    | -2.384 | 3.371  | 0.788  | -2.440 | 3.463  | 0.837  |
| Si    | -0.396 | -1.425 | -0.315 | -0.392 | -1.442 | -0.364 |
| Si    | 3.136  | -2.059 | -0.564 | 3.190  | -2.068 | -0.547 |
| Si    | 1.577  | -0.612 | -1.576 | 1.623  | -0.668 | -1.662 |
| Si    | 0.821  | -4.126 | -0.248 | 0.806  | -4.271 | -0.278 |
| Si    | -1.024 | -3.410 | -1.552 | -1.010 | -3.464 | -1.613 |
| Si    | 2.731  | -4.199 | -1.591 | 2.784  | -4.245 | -1.575 |
| Si    | -0.034 | -2.894 | 1.640  | -0.036 | -2.962 | 1.608  |
| Si    | 1.035  | -2.726 | -2.520 | 1.084  | -2.811 | -2.618 |
| Si    | 1.669  | -1.386 | 1.178  | 1.678  | -1.415 | 1.217  |
| Rb    | -3.514 | -2.453 | 1.125  | -3.569 | -2.482 | 1.239  |
| No.15 | PW91   |        |        | BLYP   |        |        |
| Si    | -1.919 | 0.523  | 0.539  | -1.851 | 0.536  | 0.562  |
| Si    | 1.646  | 1.226  | -1.708 | 1.670  | 1.249  | -1.714 |
| Si    | -1.390 | 3.906  | 2.519  | -1.420 | 3.962  | 2.549  |
| Si    | -0.561 | 1.940  | -1.069 | -0.612 | 2.009  | -1.229 |
| Si    | -3.051 | 1.776  | -1.060 | -3.122 | 1.738  | -0.982 |
| Si    | -0.657 | 1.674  | 2.117  | -0.654 | 1.690  | 2.222  |
| Si    | -0.835 | 4.366  | -1.373 | -0.859 | 4.474  | -1.356 |
| Si    | 1.465  | 1.923  | 0.586  | 1.449  | 2.005  | 0.577  |
| Si    | 1.519  | 0.808  | 2.683  | 1.599  | 0.856  | 2.686  |
| Si    | 0.210  | 3.934  | 0.716  | 0.206  | 4.040  | 0.744  |
| Si    | -2.311 | 3.652  | 0.317  | -2.370 | 3.712  | 0.315  |
| Si    | -0.598 | -1.339 | 0.104  | -0.628 | -1.430 | 0.158  |
| Si    | 1.734  | -1.020 | -0.871 | 1.771  | -1.030 | -0.870 |
| Si    | -0.426 | -3.371 | 1.314  | -0.471 | -3.479 | 1.380  |
| Si    | -0.669 | -4.936 | -0.513 | -0.692 | -5.005 | -0.528 |
| Si    | -0.161 | -2.864 | -1.703 | -0.216 | -2.890 | -1.750 |
| Si    | 1.561  | -4.261 | -0.181 | 1.571  | -4.379 | -0.190 |
| Si    | 1.787  | -3.522 | 2.108  | 1.798  | -3.572 | 2.111  |
| Si    | 2.196  | -2.972 | -2.130 | 2.176  | -3.023 | -2.138 |
| Si    | 1.499  | -1.247 | 1.458  | 1.544  | -1.251 | 1.480  |
| Rb    | -1.041 | -0.198 | -3.850 | -0.890 | -0.215 | -4.027 |
| No.16 | PW91   |        |        | BLYP   |        |        |
| Si    | -1.924 | 0.349  | -0.184 | -1.842 | 0.383  | -0.115 |
| Si    | 1.630  | 1.491  | -2.133 | 1.658  | 1.507  | -2.149 |
| Si    | -1.645 | 3.662  | 1.641  | -1.651 | 3.711  | 1.694  |
| Si    | -0.583 | 1.928  | -1.285 | -0.618 | 1.972  | -1.383 |
| Si    | -3.013 | 1.439  | 1.731  | -3.120 | 1.448  | 1.693  |
| Si    | -0.639 | 1.329  | 1.645  | -0.733 | 1.356  | 1.887  |
| Si    | -1.807 | 4.001  | -1.130 | -1.819 | 4.076  | -1.223 |
| Si    | 1.555  | 2.093  | 0.150  | 1.504  | 2.166  | 0.142  |
| Si    | 1.630  | 1.161  | 2.349  | 1.649  | 1.176  | 2.357  |
| Si    | 0.133  | 4.012  | 0.165  | 0.102  | 4.102  | 0.139  |
| Si    | -3.680 | 3.576  | 0.550  | -3.706 | 3.667  | 0.581  |
| Si    | -0.330 | -1.419 | -0.106 | -0.324 | -1.482 | -0.140 |
| Si    | 3.339  | -1.856 | -0.294 | 3.405  | -1.845 | -0.288 |
| Si    | -0.619 | -3.726 | 0.501  | -0.604 | -3.799 | 0.590  |
| Si    | 1.656  | -0.879 | -1.640 | 1.721  | -0.908 | -1.726 |
| Si    | 0.040  | -2.404 | -2.365 | 0.085  | -2.447 | -2.423 |
| Si    | 3.215  | -4.206 | 0.264  | 3.236  | -4.243 | 0.197  |
| Si    | 1.419  | -3.159 | 1.600  | 1.492  | -3.241 | 1.637  |
| Si    | 1.261  | -3.915 | -0.953 | 1.191  | -4.078 | -0.977 |
| Si    | 1.743  | -0.852 | 1.110  | 1.777  | -0.906 | 1.158  |
| Rb    | -3.387 | -2.626 | -1.611 | -3.407 | -2.618 | -1.647 |
| No.17 | PW91   |        |        | BLYP   |        |        |
| Si    | -1.895 | 0.587  | 0.143  | -1.884 | 0.600  | 0.153  |
| Si    | 1.407  | 1.303  | -2.178 | 1.356  | 1.334  | -2.266 |
| Si    | -0.842 | 4.271  | 2.366  | -0.782 | 4.384  | 2.399  |
| Si    | -0.820 | 1.940  | -1.429 | -0.904 | 1.989  | -1.475 |
| Si    | -3.045 | 1.542  | 1.899  | -3.028 | 1.540  | 1.950  |
| Si    | -0.602 | 1.873  | 2.062  | -0.592 | 1.945  | 2.257  |

Part III: xyz Coordinates for Stationary Points

|                    |        |        |        |        |        |        |
|--------------------|--------|--------|--------|--------|--------|--------|
| Si                 | -1.640 | 4.181  | -1.482 | -1.759 | 4.262  | -1.439 |
| Si                 | 1.300  | 2.039  | 0.070  | 1.281  | 2.135  | -0.004 |
| Si                 | 1.673  | 1.167  | 2.257  | 1.714  | 1.190  | 2.167  |
| Si                 | 0.080  | 4.052  | 0.184  | 0.057  | 4.172  | 0.152  |
| Si                 | -2.374 | 3.581  | 0.728  | -2.416 | 3.680  | 0.843  |
| Si                 | -0.734 | -1.422 | 0.010  | -0.760 | -1.449 | -0.084 |
| Si                 | 3.100  | -2.319 | 0.068  | 3.152  | -2.529 | 0.266  |
| Si                 | -1.072 | -3.737 | 0.083  | -1.154 | -3.794 | 0.078  |
| Si                 | 1.150  | -0.908 | -1.337 | 1.168  | -0.923 | -1.401 |
| Si                 | 0.492  | -4.859 | -1.597 | 0.548  | -4.848 | -1.650 |
| Si                 | 1.527  | -4.117 | 0.344  | 1.506  | -4.292 | 0.398  |
| Si                 | 0.161  | -2.908 | 1.972  | 0.124  | -2.933 | 1.970  |
| Si                 | 2.056  | -2.965 | -1.970 | 2.210  | -2.998 | -1.901 |
| Si                 | 1.394  | -0.929 | 1.188  | 1.420  | -0.964 | 1.144  |
| Rb                 | -1.321 | -2.368 | -3.383 | -1.262 | -2.498 | -3.558 |
| No.18              | PW91   |        |        | BLYP   |        |        |
| Si                 | -2.135 | 1.000  | -0.321 | -2.117 | 0.987  | -0.321 |
| Si                 | 1.525  | 1.380  | -2.017 | 1.547  | 1.415  | -2.040 |
| Si                 | -0.969 | 4.170  | 2.508  | -0.972 | 4.271  | 2.530  |
| Si                 | -0.652 | 2.317  | -1.539 | -0.683 | 2.350  | -1.590 |
| Si                 | -3.424 | 1.896  | 1.368  | -3.451 | 1.887  | 1.361  |
| Si                 | -1.018 | 1.807  | 1.916  | -1.074 | 1.850  | 2.088  |
| Si                 | -1.142 | 4.644  | -1.394 | -1.214 | 4.706  | -1.402 |
| Si                 | 1.169  | 1.893  | 0.274  | 1.180  | 1.983  | 0.269  |
| Si                 | 1.088  | 0.753  | 2.376  | 1.106  | 0.791  | 2.369  |
| Si                 | 0.252  | 4.056  | 0.473  | 0.243  | 4.162  | 0.460  |
| Si                 | -2.290 | 3.924  | 0.588  | -2.356 | 3.997  | 0.638  |
| Si                 | -1.258 | -1.175 | -0.341 | -1.217 | -1.205 | -0.376 |
| Si                 | 2.499  | -2.312 | -0.226 | 2.580  | -2.358 | -0.215 |
| Si                 | -1.126 | -3.197 | 0.933  | -1.152 | -3.222 | 0.966  |
| Si                 | 0.888  | -0.849 | -1.439 | 0.963  | -0.878 | -1.484 |
| Si                 | 0.450  | -4.334 | -0.660 | 0.384  | -4.434 | -0.683 |
| Si                 | -0.898 | -2.773 | -2.084 | -0.891 | -2.803 | -2.169 |
| Si                 | 1.250  | -3.500 | 1.595  | 1.257  | -3.573 | 1.601  |
| Si                 | 1.552  | -2.925 | -2.459 | 1.596  | -2.998 | -2.482 |
| Si                 | 0.694  | -1.217 | 1.088  | 0.739  | -1.252 | 1.110  |
| Rb                 | 3.541  | -5.559 | -0.637 | 3.526  | -5.676 | -0.628 |
| No.19              | PW91   |        |        | BLYP   |        |        |
| Si                 | -2.063 | 0.906  | -0.449 | -2.063 | 0.906  | -0.449 |
| Si                 | 1.661  | 1.497  | -2.069 | 1.661  | 1.497  | -2.069 |
| Si                 | -1.051 | 4.152  | 2.515  | -1.051 | 4.152  | 2.515  |
| Si                 | -0.618 | 2.346  | -1.633 | -0.618 | 2.346  | -1.633 |
| Si                 | -3.469 | 1.777  | 1.187  | -3.469 | 1.777  | 1.187  |
| Si                 | -1.107 | 1.742  | 2.003  | -1.107 | 1.742  | 2.003  |
| Si                 | -1.178 | 4.688  | -1.416 | -1.178 | 4.688  | -1.416 |
| Si                 | 1.220  | 1.985  | 0.253  | 1.220  | 1.985  | 0.253  |
| Si                 | 1.101  | 0.738  | 2.301  | 1.101  | 0.738  | 2.301  |
| Si                 | 0.226  | 4.129  | 0.477  | 0.226  | 4.129  | 0.477  |
| Si                 | -2.382 | 3.912  | 0.578  | -2.382 | 3.912  | 0.578  |
| Si                 | -1.092 | -1.260 | -0.554 | -1.092 | -1.260 | -0.554 |
| Si                 | 2.815  | -2.210 | -0.205 | 2.815  | -2.210 | -0.205 |
| Si                 | -0.964 | -2.903 | 1.223  | -0.964 | -2.903 | 1.223  |
| Si                 | 1.172  | -0.746 | -1.373 | 1.172  | -0.746 | -1.373 |
| Si                 | 0.055  | -4.268 | -0.650 | 0.055  | -4.268 | -0.650 |
| Si                 | -1.001 | -2.969 | -2.347 | -1.001 | -2.969 | -2.347 |
| Si                 | 2.416  | -4.583 | -1.042 | 2.416  | -4.583 | -1.042 |
| Si                 | 1.451  | -2.921 | -2.458 | 1.451  | -2.921 | -2.458 |
| Si                 | 0.883  | -1.398 | 1.161  | 0.883  | -1.398 | 1.161  |
| Rb                 | 1.923  | -4.616 | 2.496  | 1.923  | -4.616 | 2.496  |
| No.20              | PW91   |        |        | BLYP   |        |        |
| Si                 | -1.983 | 0.748  | -0.053 | -2.007 | 0.766  | -0.075 |
| Si                 | 1.503  | 1.300  | -1.971 | 1.504  | 1.322  | -2.016 |
| Si                 | -1.006 | 4.208  | 2.456  | -0.984 | 4.290  | 2.491  |
| Si                 | -0.703 | 2.095  | -1.474 | -0.740 | 2.134  | -1.531 |
| Si                 | -3.267 | 1.621  | 1.652  | -3.304 | 1.655  | 1.641  |
| Si                 | -0.843 | 1.818  | 2.044  | -0.892 | 1.850  | 2.198  |
| Si                 | -1.446 | 4.356  | -1.459 | -1.479 | 4.436  | -1.452 |
| Si                 | 1.246  | 1.992  | 0.266  | 1.251  | 2.047  | 0.243  |
| Si                 | 1.384  | 0.990  | 2.425  | 1.395  | 1.005  | 2.408  |
| Si                 | 0.103  | 4.053  | 0.349  | 0.115  | 4.140  | 0.346  |
| Si                 | -2.401 | 3.673  | 0.637  | -2.446 | 3.786  | 0.694  |
| Si                 | -0.964 | -1.395 | -0.151 | -1.006 | -1.412 | -0.185 |
| Si                 | 2.781  | -2.165 | -0.135 | 2.835  | -2.176 | -0.135 |
| Si                 | -1.512 | -3.541 | 0.807  | -1.512 | -3.591 | 0.794  |
| Si                 | 1.177  | -1.045 | -1.548 | 1.214  | -1.061 | -1.593 |
| Si                 | 0.044  | -4.007 | -0.870 | 0.032  | -4.144 | -0.902 |
| Si                 | -0.686 | -2.239 | -2.385 | -0.663 | -2.304 | -2.411 |
| Si                 | 2.151  | -4.517 | 0.131  | 2.182  | -4.563 | 0.133  |
| Si                 | 0.738  | -3.254 | 1.562  | 0.753  | -3.345 | 1.616  |
| Si                 | 1.196  | -0.960 | 1.104  | 1.207  | -1.027 | 1.147  |
| Rb                 | 2.486  | -3.733 | -3.387 | 2.543  | -3.810 | -3.411 |
| No.21              | PW91   |        |        | BLYP   |        |        |
| Si                 | -1.300 | 0.677  | 0.360  | -1.313 | 0.652  | 0.355  |
| Si                 | 2.161  | 1.300  | -1.548 | 2.192  | 1.336  | -1.542 |
| Si                 | -1.757 | 4.750  | 1.542  | -1.809 | 4.810  | 1.566  |
| Si                 | -0.275 | 1.394  | -1.698 | -0.280 | 1.374  | -1.738 |
| Si                 | -3.462 | 1.328  | 1.063  | -3.496 | 1.352  | 1.076  |
| Si                 | -1.709 | 2.426  | 2.221  | -1.759 | 2.456  | 2.289  |
| Si                 | -1.447 | 3.511  | -2.161 | -1.482 | 3.544  | -2.182 |
| Si                 | 1.061  | 2.116  | 0.365  | 1.069  | 2.220  | 0.360  |
| Si                 | 0.321  | 1.068  | 2.343  | 0.343  | 1.160  | 2.363  |
| Si                 | -0.251 | 4.036  | -0.146 | -0.273 | 4.151  | -0.163 |
| Si                 | -2.701 | 3.318  | -0.100 | -2.781 | 3.399  | -0.103 |
| Si                 | 0.092  | -1.064 | 1.109  | 0.140  | -1.028 | 1.202  |
| Si                 | 3.261  | -2.787 | -0.630 | 3.284  | -2.841 | -0.630 |
| Si                 | -0.565 | -3.315 | 1.505  | -0.586 | -3.334 | 1.498  |
| Si                 | 1.946  | -0.820 | -0.386 | 1.976  | -0.833 | -0.373 |
| Si                 | -1.026 | -3.117 | -0.800 | -1.069 | -3.148 | -0.829 |
| Si                 | -0.168 | -1.045 | -1.709 | -0.121 | -1.101 | -1.808 |
| Si                 | 0.287  | -4.748 | -1.989 | 0.268  | -4.807 | -2.004 |
| Si                 | 1.242  | -4.025 | 0.042  | 1.240  | -4.128 | 0.054  |
| Si                 | 1.562  | -2.651 | -2.285 | 1.624  | -2.718 | -2.355 |
| Rb                 | 2.725  | -2.354 | 2.901  | 2.831  | -2.516 | 2.962  |
| CsSi <sub>20</sub> |        |        |        |        |        |        |
| Cage               | PW91   |        |        | BLYP   |        |        |
| Si                 | 2.852  | -1.191 | -1.666 | 2.797  | -1.159 | -1.638 |
| Si                 | 2.710  | 0.987  | -0.718 | 2.882  | 1.066  | -0.761 |
| Si                 | 0.883  | -1.143 | -3.049 | 0.840  | -1.118 | -3.039 |
| Si                 | 0.020  | 1.053  | -2.939 | 0.007  | 1.120  | -3.090 |
| Si                 | 1.440  | 2.630  | -1.857 | 1.443  | 2.650  | -1.877 |
| Si                 | -0.872 | -2.418 | -2.056 | -0.871 | -2.467 | -2.064 |
| Si                 | -2.868 | -1.173 | -1.634 | -2.868 | -1.166 | -1.640 |
| Si                 | -2.176 | 1.077  | -2.099 | -2.202 | 1.082  | -2.190 |
| Si                 | 0.008  | -3.040 | 0.031  | -0.012 | -3.251 | 0.016  |
| Si                 | -1.440 | -2.630 | 1.857  | -1.443 | -2.650 | 1.877  |
| Si                 | -2.710 | -0.986 | 0.718  | -2.882 | -1.066 | 0.761  |
| Si                 | 2.325  | -2.577 | 0.267  | 2.246  | -2.520 | 0.273  |
| Si                 | 2.177  | -1.077 | 2.099  | 2.202  | -1.082 | 2.190  |
| Si                 | -0.020 | -1.053 | 2.939  | -0.007 | -1.120 | 3.090  |
| Si                 | 2.868  | 1.173  | 1.634  | 2.868  | 1.166  | 1.640  |
| Si                 | 0.873  | 2.418  | 2.057  | 0.871  | 2.467  | 2.064  |
| Si                 | -0.883 | 1.143  | 3.048  | -0.840 | 1.118  | 3.039  |
| Si                 | -2.852 | 1.191  | 1.666  | -2.796 | 1.159  | 1.638  |
| Si                 | -2.325 | 2.577  | -0.267 | -2.245 | 2.520  | -0.273 |
| Si                 | -0.008 | 3.040  | -0.031 | 0.012  | 3.251  | -0.016 |
| Cs                 | 0.000  | 0.000  | 0.000  | 0.000  | -0.000 | 0.000  |
| No.1               | PW91   |        |        | BLYP   |        |        |
| Cs                 | -3.692 | -0.158 | -2.178 | -4.015 | -0.449 | -1.778 |
| Si                 | 0.903  | 1.345  | -2.076 | 0.842  | 1.336  | -2.020 |
| Si                 | -0.455 | 4.386  | 2.568  | -0.363 | 4.600  | 2.573  |
| Si                 | -0.995 | 2.117  | -0.793 | -1.097 | 2.339  | -0.884 |

Part III: xyz Coordinates for Stationary Points

|      |        |        |        |        |        |        |
|------|--------|--------|--------|--------|--------|--------|
| Si   | -2.430 | 1.287  | 0.947  | -2.639 | 1.794  | 0.912  |
| Si   | -0.417 | 1.971  | 1.976  | -0.579 | 2.149  | 2.068  |
| Si   | -1.308 | 4.544  | -1.154 | -1.045 | 4.823  | -1.202 |
| Si   | 1.458  | 2.116  | 0.106  | 1.377  | 2.118  | 0.178  |
| Si   | 1.802  | 1.127  | 2.242  | 1.591  | 1.050  | 2.303  |
| Si   | 0.480  | 4.234  | 0.372  | 0.688  | 4.364  | 0.409  |
| Si   | -2.099 | 3.749  | 0.983  | -2.048 | 4.159  | 0.906  |
| Si   | -1.101 | -1.455 | 0.472  | -1.185 | -1.812 | 0.456  |
| Si   | 2.870  | -1.979 | -0.293 | 2.892  | -1.973 | -0.238 |
| Si   | -0.755 | -3.866 | 0.452  | -0.640 | -4.198 | 0.338  |
| Si   | 0.752  | -0.865 | -1.188 | 0.660  | -0.954 | -1.203 |
| Si   | 0.167  | -4.856 | -1.593 | 0.447  | -5.020 | -1.753 |
| Si   | -0.903 | -2.537 | -1.747 | -0.871 | -2.748 | -1.851 |
| Si   | 1.886  | -4.181 | -0.012 | 2.080  | -4.284 | -0.067 |
| Si   | 0.964  | -3.189 | 1.949  | 1.011  | -3.388 | 1.918  |
| Si   | 1.676  | -2.853 | -2.245 | 1.814  | -2.833 | -2.296 |
| Si   | 1.195  | -0.934 | 1.212  | 1.077  | -1.069 | 1.231  |
| No.2 | PW91   |        |        | BLYP   |        |        |
| Si   | -1.789 | 0.776  | 0.160  | -1.837 | 0.778  | 0.151  |
| Cs   | 1.878  | 2.120  | -3.462 | 1.971  | 2.127  | -3.451 |
| Si   | -1.541 | 3.488  | 2.951  | -1.599 | 3.538  | 2.979  |
| Si   | -1.142 | 2.753  | -1.312 | -1.114 | 2.808  | -1.331 |
| Si   | -3.436 | 2.091  | -0.808 | -3.455 | 2.152  | -0.838 |
| Si   | -0.625 | 1.461  | 2.072  | -0.649 | 1.500  | 2.071  |
| Si   | -1.309 | 5.077  | -0.526 | -1.353 | 5.160  | -0.511 |
| Si   | 0.896  | 2.121  | 0.126  | 0.977  | 2.288  | 0.183  |
| Si   | 1.706  | 0.802  | 2.016  | 1.706  | 0.822  | 2.054  |
| Si   | -0.063 | 3.994  | 1.174  | -0.072 | 4.133  | 1.236  |
| Si   | -2.679 | 3.704  | 0.815  | -2.775 | 3.797  | 0.828  |
| Si   | -0.717 | -1.203 | -0.569 | -0.736 | -1.234 | -0.549 |
| Si   | 2.967  | -2.507 | -0.401 | 3.007  | -2.520 | -0.479 |
| Si   | -0.720 | -2.660 | 1.449  | -0.714 | -2.750 | 1.455  |
| Si   | 1.464  | -1.111 | -1.704 | 1.409  | -1.211 | -1.809 |
| Si   | -0.114 | -4.486 | -0.065 | -0.103 | -4.627 | -0.037 |
| Si   | -1.103 | -3.203 | -1.790 | -1.131 | -3.286 | -1.752 |
| Si   | 2.230  | -4.997 | -0.462 | 2.279  | -5.074 | -0.478 |
| Si   | 1.582  | -3.510 | 1.611  | 1.637  | -3.542 | 1.638  |
| Si   | 1.246  | -3.489 | -2.102 | 1.240  | -3.617 | -2.176 |
| Si   | 1.265  | -1.226 | 0.827  | 1.310  | -1.244 | 0.815  |
| No.3 | PW91   |        |        | BLYP   |        |        |
| Si   | -2.283 | 0.603  | -0.309 | -2.293 | 0.603  | -0.325 |
| Si   | 1.230  | 1.268  | -2.505 | 1.248  | 1.310  | -2.487 |
| Cs   | -0.455 | 3.702  | 4.086  | -0.227 | 3.967  | 4.146  |
| Si   | -0.857 | 2.042  | -1.586 | -0.901 | 2.067  | -1.647 |
| Si   | -2.862 | 1.638  | 1.828  | -2.983 | 1.676  | 1.803  |
| Si   | -0.627 | 1.597  | 1.149  | -0.693 | 1.647  | 1.205  |
| Si   | -1.621 | 4.276  | -1.497 | -1.686 | 4.341  | -1.481 |
| Si   | 1.463  | 2.029  | -0.235 | 1.453  | 2.121  | -0.192 |
| Si   | 1.514  | 0.996  | 1.946  | 1.466  | 0.993  | 1.982  |
| Si   | 0.133  | 3.965  | 0.074  | 0.086  | 4.062  | 0.089  |
| Si   | -2.116 | 3.806  | 0.908  | -2.188 | 3.920  | 1.000  |
| Si   | -0.964 | -1.356 | -0.222 | -0.977 | -1.410 | -0.260 |
| Si   | 3.180  | -1.783 | -0.520 | 3.230  | -1.844 | -0.535 |
| Si   | -1.787 | -3.679 | -0.362 | -1.793 | -3.761 | -0.464 |
| Si   | 1.016  | -0.919 | -1.563 | 1.053  | -0.958 | -1.596 |
| Si   | 0.468  | -4.541 | -0.456 | 0.488  | -4.669 | -0.463 |
| Si   | -0.417 | -2.748 | -2.311 | -0.356 | -2.825 | -2.401 |
| Si   | 2.099  | -3.476 | 0.968  | 2.130  | -3.565 | 0.998  |
| Si   | -0.220 | -2.961 | 1.643  | -0.237 | -3.045 | 1.661  |
| Si   | 1.917  | -3.346 | -1.945 | 1.988  | -3.465 | -1.958 |
| Si   | 1.190  | -1.114 | 0.907  | 1.191  | -1.164 | 0.924  |
| No.4 | PW91   |        |        | BLYP   |        |        |
| Si   | -2.210 | 0.651  | 0.736  | -2.188 | 0.657  | 0.784  |
| Si   | 1.750  | 1.243  | -2.110 | 1.669  | 1.304  | -2.086 |
| Si   | -0.990 | 4.010  | 2.542  | -1.046 | 4.056  | 2.619  |
| Cs   | -1.650 | 2.205  | -2.971 | -1.819 | 2.178  | -3.172 |
| Si   | -4.020 | 1.791  | -0.017 | -3.971 | 1.807  | -0.064 |
| Si   | -0.442 | 1.769  | 1.791  | -0.451 | 1.810  | 1.892  |
| Si   | -1.371 | 5.173  | -0.201 | -1.322 | 5.237  | -0.316 |
| Si   | 1.571  | 1.866  | 0.149  | 1.608  | 1.965  | 0.195  |
| Si   | 1.739  | 0.871  | 2.337  | 1.787  | 0.905  | 2.380  |
| Si   | 0.338  | 3.783  | 0.430  | 0.363  | 3.891  | 0.532  |
| Si   | -2.449 | 3.322  | 0.743  | -2.490 | 3.471  | 0.712  |
| Si   | -1.014 | -1.218 | -0.018 | -0.997 | -1.263 | 0.079  |
| Si   | 2.932  | -2.159 | -0.199 | 2.976  | -2.210 | -0.222 |
| Si   | -1.042 | -3.304 | 1.147  | -1.097 | -3.462 | 1.080  |
| Si   | 1.135  | -0.878 | -1.312 | 1.156  | -0.894 | -1.330 |
| Si   | -0.018 | -4.312 | -0.723 | 0.017  | -4.418 | -0.789 |
| Si   | -0.737 | -2.439 | -2.140 | -0.784 | -2.452 | -2.121 |
| Si   | 2.379  | -4.688 | -0.466 | 2.428  | -4.759 | -0.435 |
| Si   | 1.319  | -3.519 | 1.421  | 1.301  | -3.600 | 1.457  |
| Si   | 1.626  | -3.035 | -2.293 | 1.626  | -3.058 | -2.389 |
| Si   | 1.150  | -1.132 | 1.151  | 1.228  | -1.167 | 1.191  |
| No.5 | PW91   |        |        | BLYP   |        |        |
| Si   | -2.496 | 0.611  | -0.289 | -2.447 | 0.630  | -0.272 |
| Si   | 1.446  | 1.402  | -2.001 | 1.479  | 1.427  | -2.001 |
| Si   | -0.903 | 3.751  | 1.607  | -0.992 | 3.843  | 1.656  |
| Si   | -0.775 | 1.836  | -1.377 | -0.783 | 1.910  | -1.447 |
| Cs   | -4.656 | 2.176  | 2.262  | -4.734 | 2.217  | 2.213  |
| Si   | -1.011 | 1.353  | 1.450  | -1.027 | 1.412  | 1.540  |
| Si   | -0.628 | 4.174  | -0.859 | -0.703 | 4.264  | -0.857 |
| Si   | 1.215  | 2.105  | 0.329  | 1.320  | 2.155  | 0.342  |
| Si   | 1.069  | 0.728  | 2.350  | 1.107  | 0.748  | 2.353  |
| Si   | 1.213  | 4.508  | 0.710  | 1.160  | 4.579  | 0.724  |
| Si   | -2.652 | 4.393  | 0.202  | -2.717 | 4.588  | 0.243  |
| Si   | -1.101 | -1.283 | -0.412 | -1.071 | -1.313 | -0.423 |
| Si   | 2.946  | -2.045 | -0.144 | 2.999  | -2.103 | -0.161 |
| Si   | -0.926 | -3.213 | 1.038  | -0.947 | -3.290 | 1.018  |
| Si   | 1.142  | -0.872 | -1.372 | 1.199  | -0.906 | -1.405 |
| Si   | 0.106  | -4.448 | -0.759 | 0.115  | -4.589 | -0.759 |
| Si   | -0.631 | -2.735 | -2.282 | -0.693 | -2.861 | -2.266 |
| Si   | 2.534  | -4.621 | -0.581 | 2.572  | -4.697 | -0.615 |
| Si   | 1.429  | -3.567 | 1.389  | 1.447  | -3.650 | 1.441  |
| Si   | 1.752  | -3.008 | -2.293 | 1.739  | -3.073 | -2.377 |
| Si   | 0.923  | -1.244 | 1.033  | 0.975  | -1.291 | 1.052  |
| No.6 | PW91   |        |        | BLYP   |        |        |
| Si   | -2.250 | 0.773  | -0.290 | -2.242 | 0.771  | -0.276 |
| Si   | 1.562  | 1.384  | -2.094 | 1.573  | 1.406  | -2.132 |
| Si   | -1.261 | 4.993  | 1.575  | -1.217 | 5.048  | 1.677  |
| Si   | -0.547 | 2.119  | -1.180 | -0.586 | 2.156  | -1.245 |
| Si   | -3.980 | 1.705  | 0.850  | -3.915 | 1.704  | 0.971  |
| Cs   | -1.354 | 1.452  | 3.608  | -1.403 | 1.568  | 3.844  |
| Si   | -1.128 | 4.468  | -1.348 | -1.217 | 4.504  | -1.420 |
| Si   | 1.600  | 1.843  | 0.268  | 1.627  | 1.950  | 0.241  |
| Si   | 1.977  | 0.705  | 2.297  | 1.912  | 0.769  | 2.291  |
| Si   | 0.366  | 3.756  | 0.539  | 0.369  | 3.881  | 0.456  |
| Si   | -2.439 | 3.372  | 0.366  | -2.490 | 3.505  | 0.436  |
| Si   | -1.009 | -1.199 | -0.039 | -0.996 | -1.231 | -0.046 |
| Si   | 2.907  | -2.175 | -0.418 | 2.942  | -2.244 | -0.405 |
| Si   | -1.028 | -3.311 | 1.081  | -1.148 | -3.446 | 0.912  |
| Si   | 1.041  | -0.854 | -1.425 | 1.082  | -0.901 | -1.485 |
| Si   | -0.047 | -4.286 | -0.823 | 0.020  | -4.408 | -0.916 |
| Si   | -0.853 | -2.408 | -2.190 | -0.839 | -2.464 | -2.245 |
| Si   | 2.348  | -4.685 | -0.629 | 2.414  | -4.768 | -0.496 |
| Si   | 1.340  | -3.520 | 1.280  | 1.243  | -3.579 | 1.343  |
| Si   | 1.513  | -2.998 | -2.465 | 1.593  | -3.061 | -2.554 |
| Si   | 1.241  | -1.135 | 1.038  | 1.275  | -1.161 | 1.049  |
| No.7 | PW91   |        |        | BLYP   |        |        |
| Si   | -2.890 | -0.029 | 0.648  | -2.860 | -0.006 | 0.636  |
| Si   | 0.365  | 1.412  | -1.912 | 0.424  | 1.443  | -1.881 |
| Si   | -1.427 | 3.347  | 2.268  | -1.483 | 3.427  | 2.312  |
| Si   | -1.667 | 1.473  | -0.743 | -1.688 | 1.541  | -0.798 |
| Si   | -3.534 | 3.788  | 1.387  | -3.594 | 3.970  | 1.426  |
| Si   | -1.168 | 0.972  | 1.972  | -1.193 | 1.025  | 2.054  |

Part III: xyz Coordinates for Stationary Points

|       |        |        |        |        |        |        |
|-------|--------|--------|--------|--------|--------|--------|
| Cs    | 1.297  | 4.877  | -2.404 | 1.165  | 5.056  | -2.533 |
| Si    | 0.614  | 2.074  | 0.429  | 0.737  | 2.121  | 0.462  |
| Si    | 1.144  | 0.702  | 2.374  | 1.145  | 0.695  | 2.417  |
| Si    | 0.267  | 4.419  | 0.968  | 0.247  | 4.472  | 0.986  |
| Si    | -1.816 | 3.794  | -0.176 | -1.887 | 3.872  | -0.177 |
| Si    | -1.205 | -1.582 | 0.070  | -1.186 | -1.627 | 0.057  |
| Si    | 2.886  | -1.672 | -0.628 | 2.939  | -1.728 | -0.606 |
| Si    | -0.391 | -3.509 | 1.273  | -0.444 | -3.638 | 1.229  |
| Si    | 0.680  | -0.855 | -1.372 | 0.733  | -0.879 | -1.388 |
| Si    | 0.423  | -4.532 | -0.747 | 0.444  | -4.672 | -0.792 |
| Si    | -0.918 | -2.919 | -1.936 | -0.934 | -3.023 | -1.947 |
| Si    | 2.830  | -4.259 | -1.072 | 2.873  | -4.329 | -1.087 |
| Si    | 2.010  | -3.449 | 1.128  | 2.013  | -3.559 | 1.187  |
| Si    | 1.420  | -2.812 | -2.535 | 1.433  | -2.860 | -2.602 |
| Si    | 1.075  | -1.242 | 1.009  | 1.111  | -1.305 | 1.046  |
| No.8  | PW91   |        |        | BLYP   |        |        |
| Si    | -2.397 | 0.796  | -0.129 | -2.379 | 0.789  | -0.114 |
| Si    | 1.054  | 1.636  | -2.078 | 1.052  | 1.682  | -2.074 |
| Si    | -0.289 | 3.890  | 1.898  | -0.341 | 3.978  | 1.944  |
| Si    | -1.318 | 1.961  | -1.870 | -1.326 | 2.002  | -1.860 |
| Si    | -3.439 | 1.955  | 1.647  | -3.506 | 1.973  | 1.621  |
| Si    | -1.026 | 1.598  | 1.770  | -1.088 | 1.659  | 1.919  |
| Si    | -1.426 | 4.294  | -1.653 | -1.516 | 4.364  | -1.691 |
| Cs    | 3.332  | 1.953  | 1.325  | 3.436  | 2.094  | 1.314  |
| Si    | 0.475  | 0.285  | 3.038  | 0.538  | 0.321  | 3.038  |
| Si    | 0.297  | 3.202  | -0.351 | 0.300  | 3.410  | -0.391 |
| Si    | -2.179 | 3.745  | 0.512  | -2.231 | 3.867  | 0.535  |
| Si    | -1.315 | -1.282 | -0.265 | -1.272 | -1.303 | -0.236 |
| Si    | 2.728  | -1.792 | 0.052  | 2.785  | -1.896 | 0.053  |
| Si    | -1.060 | -3.378 | 0.895  | -1.136 | -3.499 | 0.805  |
| Si    | 0.901  | -0.555 | -1.104 | 0.977  | -0.604 | -1.139 |
| Si    | 0.133  | -4.264 | -0.997 | 0.131  | -4.389 | -1.059 |
| Si    | -0.672 | -2.406 | -2.295 | -0.690 | -2.457 | -2.316 |
| Si    | 2.536  | -4.340 | -0.712 | 2.549  | -4.456 | -0.660 |
| Si    | 1.315  | -3.548 | 1.305  | 1.254  | -3.657 | 1.351  |
| Si    | 1.730  | -2.512 | -2.236 | 1.773  | -2.595 | -2.310 |
| Si    | 0.620  | -1.237 | 1.249  | 0.689  | -1.282 | 1.273  |
| No.9  | PW91   |        |        | BLYP   |        |        |
| Si    | -2.218 | 0.952  | -0.617 | -2.271 | 0.890  | -0.543 |
| Si    | 1.442  | 1.382  | -1.908 | 1.441  | 1.374  | -1.905 |
| Si    | -0.716 | 3.366  | 2.190  | -0.756 | 3.638  | 2.207  |
| Si    | -0.865 | 2.335  | -1.992 | -0.918 | 2.276  | -1.982 |
| Si    | -3.553 | 1.279  | 1.253  | -3.557 | 1.348  | 1.367  |
| Si    | -1.172 | 1.001  | 1.727  | -1.130 | 1.183  | 1.836  |
| Si    | -0.963 | 4.109  | -0.332 | -1.012 | 4.176  | -0.449 |
| Si    | 0.390  | 2.021  | 0.119  | 0.426  | 2.125  | 0.135  |
| Cs    | 4.054  | 1.840  | 0.593  | 4.154  | 1.883  | 0.671  |
| Si    | 1.101  | 4.255  | 0.898  | 1.054  | 4.468  | 0.787  |
| Si    | -2.798 | 3.621  | 1.175  | -2.837 | 3.727  | 1.156  |
| Si    | -1.390 | -1.277 | -0.787 | -1.326 | -1.317 | -0.578 |
| Si    | 2.387  | -1.788 | 0.516  | 2.392  | -1.897 | 0.546  |
| Si    | -1.495 | -3.281 | 0.521  | -1.568 | -3.567 | 0.269  |
| Si    | 0.967  | -0.849 | -1.237 | 1.008  | -0.910 | -1.243 |
| Si    | 0.111  | -4.489 | -0.806 | 0.205  | -4.615 | -1.011 |
| Si    | -0.367 | -2.755 | -2.430 | -0.400 | -2.692 | -2.471 |
| Si    | 2.352  | -4.348 | 0.187  | 2.368  | -4.432 | 0.266  |
| Si    | 0.617  | -3.368 | 1.663  | 0.492  | -3.529 | 1.588  |
| Si    | 1.994  | -2.928 | -1.883 | 2.051  | -3.000 | -1.993 |
| Si    | 0.116  | -1.079 | 1.145  | 0.181  | -1.128 | 1.343  |
| No.10 | PW91   |        |        | BLYP   |        |        |
| Si    | -2.172 | 0.798  | -0.305 | -2.168 | 0.779  | -0.221 |
| Si    | 1.234  | 1.183  | -2.443 | 1.213  | 1.179  | -2.473 |
| Si    | -2.217 | 3.143  | 2.753  | -2.218 | 3.245  | 2.820  |
| Si    | -0.925 | 1.996  | -1.964 | -0.961 | 1.987  | -1.945 |
| Si    | -3.679 | 2.211  | 0.880  | -3.746 | 2.213  | 0.930  |
| Si    | -1.069 | 1.373  | 1.722  | -1.048 | 1.472  | 1.787  |
| Si    | -0.255 | 4.216  | -1.216 | -0.353 | 4.252  | -1.246 |
| Si    | 1.036  | 2.327  | -0.351 | 1.130  | 2.427  | -0.406 |
| Si    | 1.304  | 1.177  | 1.780  | 1.351  | 1.261  | 1.774  |
| Cs    | 1.065  | 4.781  | 2.468  | 1.139  | 5.025  | 2.437  |
| Si    | -1.811 | 3.603  | 0.468  | -1.947 | 3.742  | 0.506  |
| Si    | -1.203 | -1.344 | -0.375 | -1.141 | -1.371 | -0.284 |
| Si    | 2.885  | -1.977 | -0.389 | 2.923  | -2.074 | -0.356 |
| Si    | -0.873 | -3.002 | 1.332  | -1.051 | -3.302 | 1.169  |
| Si    | 0.929  | -1.042 | -1.635 | 0.983  | -1.096 | -1.660 |
| Si    | 0.037  | -4.423 | -0.367 | 0.087  | -4.547 | -0.515 |
| Si    | -0.814 | -2.976 | -2.117 | -0.805 | -2.935 | -2.193 |
| Si    | 2.466  | -4.609 | -0.294 | 2.516  | -4.667 | -0.162 |
| Si    | 1.499  | -3.185 | 1.496  | 1.343  | -3.271 | 1.546  |
| Si    | 1.585  | -3.290 | -2.224 | 1.673  | -3.360 | -2.330 |
| Si    | 0.975  | -0.957 | 0.782  | 1.075  | -0.958 | 0.824  |
| No.11 | PW91   |        |        | BLYP   |        |        |
| Si    | -2.124 | 0.960  | -0.077 | -2.089 | 0.970  | -0.093 |
| Si    | 1.655  | 1.432  | -1.958 | 1.718  | 1.483  | -1.925 |
| Si    | -1.598 | 3.921  | 1.505  | -1.590 | 4.056  | 1.598  |
| Si    | -0.413 | 2.340  | -1.058 | -0.423 | 2.396  | -1.155 |
| Si    | -2.792 | 1.865  | 2.164  | -2.857 | 1.950  | 2.164  |
| Si    | -0.556 | 1.499  | 1.720  | -0.623 | 1.481  | 1.807  |
| Si    | -0.853 | 4.635  | -0.805 | -0.885 | 4.712  | -0.843 |
| Si    | 1.702  | 1.831  | 0.391  | 1.702  | 1.946  | 0.447  |
| Si    | 1.516  | 0.600  | 2.454  | 1.507  | 0.609  | 2.487  |
| Si    | 0.682  | 3.908  | 0.855  | 0.666  | 4.044  | 0.827  |
| Cs    | -4.325 | 3.660  | -1.039 | -4.405 | 3.735  | -0.999 |
| Si    | -1.058 | -1.105 | -0.210 | -1.025 | -1.132 | -0.276 |
| Si    | 2.903  | -2.199 | -0.286 | 2.954  | -2.268 | -0.291 |
| Si    | -0.918 | -3.057 | 1.233  | -0.944 | -3.104 | 1.211  |
| Si    | 1.116  | -0.800 | -1.316 | 1.201  | -0.823 | -1.344 |
| Si    | -0.168 | -4.323 | -0.702 | -0.150 | -4.460 | -0.690 |
| Si    | -0.915 | -2.557 | -2.124 | -0.990 | -2.721 | -2.113 |
| Si    | 2.240  | -4.707 | -0.808 | 2.282  | -4.773 | -0.876 |
| Si    | 1.431  | -3.656 | 1.321  | 1.453  | -3.746 | 1.385  |
| Si    | 1.427  | -2.949 | -2.349 | 1.405  | -3.001 | -2.425 |
| Si    | 1.048  | -1.300 | 1.091  | 1.090  | -1.356 | 1.106  |
| No.12 | PW91   |        |        | BLYP   |        |        |
| Si    | -1.854 | 0.709  | 0.779  | -1.762 | 0.754  | 0.798  |
| Si    | 0.560  | 1.035  | -2.723 | 0.588  | 1.050  | -2.731 |
| Si    | -0.277 | 4.055  | 1.727  | -0.264 | 4.152  | 1.773  |
| Si    | -0.877 | 1.925  | -0.998 | -0.949 | 1.996  | -1.066 |
| Si    | -1.670 | 2.129  | 2.777  | -1.781 | 2.195  | 2.801  |
| Si    | 0.312  | 1.526  | 1.570  | 0.345  | 1.628  | 1.803  |
| Si    | -1.661 | 4.195  | -0.629 | -1.676 | 4.302  | -0.718 |
| Si    | 1.663  | 1.863  | -0.785 | 1.644  | 1.955  | -0.768 |
| Si    | 2.634  | 1.106  | 1.271  | 2.645  | 1.104  | 1.274  |
| Si    | 0.650  | 3.999  | -0.418 | 0.649  | 4.102  | -0.416 |
| Si    | -2.565 | 4.284  | 1.740  | -2.574 | 4.415  | 1.737  |
| Cs    | -3.101 | -2.208 | -1.850 | -3.268 | -2.338 | -1.903 |
| Si    | 1.885  | -1.016 | 0.497  | 1.858  | -1.058 | 0.537  |
| Si    | -0.600 | -4.938 | -1.026 | -0.636 | -4.961 | -1.029 |
| Si    | 0.431  | -1.067 | -1.596 | 0.404  | -1.122 | -1.651 |
| Si    | 1.399  | -4.199 | -0.087 | 1.438  | -4.364 | -0.139 |
| Si    | 0.661  | -3.253 | -2.420 | 0.735  | -3.312 | -2.524 |
| Si    | 1.217  | -2.898 | 1.928  | 1.367  | -3.080 | 1.912  |
| Si    | -0.897 | -3.505 | 1.003  | -0.849 | -3.575 | 1.089  |
| Si    | 2.648  | -2.501 | -1.313 | 2.693  | -2.554 | -1.293 |
| Si    | -0.561 | -1.243 | 0.555  | -0.610 | -1.291 | 0.514  |
| No.13 | PW91   |        |        | BLYP   |        |        |
| Si    | -2.103 | 0.873  | -0.360 | -2.071 | 0.882  | -0.388 |
| Si    | 1.582  | 1.298  | -1.964 | 1.650  | 1.368  | -1.943 |
| Si    | -1.060 | 4.058  | 2.508  | -1.113 | 4.143  | 2.536  |
| Si    | -0.593 | 2.216  | -1.531 | -0.593 | 2.277  | -1.584 |
| Si    | -3.480 | 1.819  | 1.234  | -3.523 | 1.804  | 1.179  |
| Si    | -1.084 | 1.698  | 1.882  | -1.169 | 1.726  | 2.021  |
| Si    | -1.062 | 4.549  | -1.399 | -1.129 | 4.635  | -1.405 |
| Si    | 1.178  | 1.808  | 0.345  | 1.181  | 1.924  | 0.365  |



Part III: xyz Coordinates for Stationary Points

|       |        |        |        |        |        |        |
|-------|--------|--------|--------|--------|--------|--------|
| Si    | 0.988  | 0.622  | 2.427  | 0.987  | 0.654  | 2.419  |
| Si    | 0.245  | 3.960  | 0.526  | 0.212  | 4.081  | 0.536  |
| Si    | -2.313 | 3.841  | 0.536  | -2.401 | 3.924  | 0.563  |
| Si    | -1.225 | -1.308 | -0.374 | -1.158 | -1.310 | -0.413 |
| Cs    | 4.345  | -1.709 | -0.165 | 4.558  | -1.937 | -0.204 |
| Si    | -1.040 | -3.091 | 1.288  | -1.050 | -3.135 | 1.271  |
| Si    | 1.011  | -0.917 | -1.333 | 1.117  | -0.913 | -1.350 |
| Si    | -0.145 | -4.323 | -0.652 | -0.179 | -4.473 | -0.642 |
| Si    | -0.960 | -2.815 | -2.311 | -1.066 | -2.945 | -2.283 |
| Si    | 2.148  | -4.739 | -0.744 | 2.142  | -4.716 | -0.781 |
| Si    | 1.333  | -3.556 | 1.369  | 1.331  | -3.634 | 1.482  |
| Si    | 1.414  | -2.998 | -2.312 | 1.337  | -3.028 | -2.410 |
| Si    | 0.820  | -1.289 | 1.028  | 0.936  | -1.328 | 1.029  |
| No.14 | PW91   |        |        | BLYP   |        |        |
| Si    | -1.712 | 0.606  | -0.641 | -1.701 | 0.621  | -0.630 |
| Si    | 2.052  | 1.456  | -1.766 | 2.069  | 1.490  | -1.819 |
| Si    | -1.333 | 3.822  | 2.443  | -1.287 | 3.946  | 2.485  |
| Si    | -0.244 | 2.164  | -1.570 | -0.272 | 2.200  | -1.636 |
| Si    | -3.302 | 1.340  | 0.865  | -3.286 | 1.345  | 0.913  |
| Si    | -0.972 | 1.519  | 1.714  | -0.995 | 1.570  | 1.912  |
| Si    | -1.032 | 4.412  | -1.446 | -1.113 | 4.473  | -1.453 |
| Si    | 1.369  | 1.891  | 0.468  | 1.384  | 1.990  | 0.434  |
| Si    | 1.151  | 0.680  | 2.519  | 1.235  | 0.720  | 2.478  |
| Si    | 0.150  | 3.913  | 0.585  | 0.157  | 4.031  | 0.563  |
| Si    | -2.361 | 3.524  | 0.351  | -2.412 | 3.600  | 0.429  |
| Si    | -0.633 | -1.460 | -0.453 | -0.607 | -1.459 | -0.492 |
| Si    | 2.916  | -2.590 | 0.108  | 2.996  | -2.629 | 0.120  |
| Cs    | -2.454 | -2.080 | 2.652  | -2.770 | -2.272 | 2.544  |
| Si    | 1.603  | -0.850 | -1.315 | 1.671  | -0.875 | -1.363 |
| Si    | 1.351  | -4.418 | -1.039 | 1.380  | -4.520 | -0.999 |
| Si    | -1.082 | -3.793 | -0.747 | -1.090 | -3.822 | -0.736 |
| Si    | 2.614  | -2.734 | -2.396 | 2.647  | -2.816 | -2.435 |
| Si    | 0.652  | -3.590 | 1.155  | 0.687  | -3.644 | 1.226  |
| Si    | 0.098  | -2.575 | -2.580 | 0.101  | -2.686 | -2.628 |
| Si    | 1.167  | -1.235 | 1.095  | 1.205  | -1.262 | 1.088  |
| No.15 | PW91   |        |        | BLYP   |        |        |
| Si    | -1.925 | 0.519  | 0.556  | -1.846 | 0.530  | 0.556  |
| Si    | 1.643  | 1.216  | -1.701 | 1.685  | 1.247  | -1.695 |
| Si    | -1.374 | 3.917  | 2.521  | -1.431 | 3.957  | 2.549  |
| Si    | -0.560 | 1.917  | -1.050 | -0.593 | 2.012  | -1.227 |
| Si    | -3.052 | 1.781  | -1.044 | -3.100 | 1.733  | -0.996 |
| Si    | -0.653 | 1.679  | 2.127  | -0.657 | 1.685  | 2.219  |
| Si    | -0.838 | 4.346  | -1.380 | -0.837 | 4.481  | -1.348 |
| Si    | 1.477  | 1.921  | 0.591  | 1.458  | 2.002  | 0.600  |
| Si    | 1.522  | 0.814  | 2.693  | 1.589  | 0.849  | 2.708  |
| Si    | 0.218  | 3.931  | 0.709  | 0.211  | 4.035  | 0.760  |
| Si    | -2.307 | 3.652  | 0.326  | -2.359 | 3.705  | 0.307  |
| Si    | -0.605 | -1.346 | 0.117  | -0.611 | -1.428 | 0.154  |
| Si    | 1.741  | -1.022 | -0.856 | 1.781  | -1.033 | -0.858 |
| Si    | -0.427 | -3.379 | 1.324  | -0.461 | -3.468 | 1.397  |
| Cs    | -1.107 | -0.168 | -4.046 | -1.083 | -0.157 | -4.235 |
| Si    | -0.660 | -4.933 | -0.514 | -0.684 | -5.006 | -0.501 |
| Si    | -0.151 | -2.854 | -1.698 | -0.199 | -2.904 | -1.738 |
| Si    | 1.567  | -4.257 | -0.165 | 1.580  | -4.382 | -0.163 |
| Si    | 1.786  | -3.519 | 2.126  | 1.805  | -3.573 | 2.138  |
| Si    | 2.208  | -2.972 | -2.111 | 2.193  | -3.031 | -2.118 |
| Si    | 1.494  | -1.244 | 1.475  | 1.556  | -1.254 | 1.492  |
| No.16 | PW91   |        |        | BLYP   |        |        |
| Si    | -1.772 | 0.575  | -0.126 | -1.644 | 0.644  | 0.061  |
| Si    | 1.635  | 1.583  | -2.140 | 1.673  | 1.575  | -2.133 |
| Si    | -1.271 | 3.588  | 1.832  | -1.310 | 3.721  | 1.918  |
| Si    | -0.524 | 2.197  | -1.278 | -0.553 | 2.209  | -1.359 |
| Si    | -2.935 | 1.587  | 1.690  | -3.016 | 1.619  | 1.727  |
| Si    | -0.566 | 1.203  | 1.857  | -0.589 | 1.394  | 2.143  |
| Si    | -1.500 | 4.333  | -0.913 | -1.588 | 4.364  | -1.122 |
| Si    | 1.566  | 1.959  | 0.187  | 1.575  | 2.132  | 0.185  |
| Si    | 1.745  | 0.791  | 2.271  | 1.813  | 0.956  | 2.300  |
| Si    | 0.472  | 4.056  | 0.334  | 0.339  | 4.171  | 0.241  |
| Si    | -3.331 | 3.932  | 0.856  | -3.378 | 3.929  | 0.832  |
| Si    | -0.785 | -1.559 | -0.374 | -0.817 | -1.555 | -0.337 |
| Si    | 3.379  | -1.759 | -0.625 | 3.387  | -1.893 | -0.537 |
| Si    | -1.916 | -3.046 | 1.209  | -1.797 | -3.252 | 1.152  |
| Si    | 1.259  | -0.700 | -1.701 | 1.400  | -0.761 | -1.709 |
| Cs    | -0.928 | -5.624 | -1.170 | -1.177 | -5.778 | -1.486 |
| Si    | -0.338 | -2.119 | -2.694 | -0.324 | -2.080 | -2.684 |
| Si    | 2.325  | -3.755 | 0.374  | 2.382  | -4.037 | 0.274  |
| Si    | 0.302  | -2.933 | 1.456  | 0.429  | -2.949 | 1.463  |
| Si    | 1.605  | -3.258 | -1.796 | 1.543  | -3.419 | -1.793 |
| Si    | 1.572  | -1.050 | 0.752  | 1.647  | -0.991 | 0.865  |
| No.17 | PW91   |        |        | BLYP   |        |        |
| Si    | -1.889 | 0.577  | 0.154  | -1.881 | 0.593  | 0.163  |
| Si    | 1.404  | 1.293  | -2.179 | 1.353  | 1.324  | -2.261 |
| Si    | -0.845 | 4.274  | 2.358  | -0.782 | 4.390  | 2.394  |
| Si    | -0.823 | 1.930  | -1.428 | -0.904 | 1.982  | -1.469 |
| Si    | -3.041 | 1.540  | 1.905  | -3.021 | 1.541  | 1.960  |
| Si    | -0.597 | 1.877  | 2.060  | -0.586 | 1.951  | 2.261  |
| Si    | -1.650 | 4.169  | -1.489 | -1.764 | 4.253  | -1.442 |
| Si    | 1.300  | 2.036  | 0.068  | 1.281  | 2.132  | -0.002 |
| Si    | 1.680  | 1.174  | 2.259  | 1.720  | 1.195  | 2.172  |
| Si    | 0.076  | 4.050  | 0.175  | 0.056  | 4.169  | 0.147  |
| Si    | -2.377 | 3.574  | 0.723  | -2.417 | 3.675  | 0.842  |
| Si    | -0.724 | -1.430 | 0.021  | -0.753 | -1.456 | -0.075 |
| Si    | 3.110  | -2.327 | 0.098  | 3.159  | -2.523 | 0.286  |
| Si    | -1.062 | -3.745 | 0.106  | -1.143 | -3.798 | 0.099  |
| Si    | 1.157  | -0.916 | -1.327 | 1.172  | -0.931 | -1.391 |
| Si    | 0.500  | -4.852 | -1.579 | 0.556  | -4.844 | -1.625 |
| Cs    | -1.412 | -2.294 | -3.528 | -1.360 | -2.467 | -3.737 |
| Si    | 1.539  | -4.127 | 0.368  | 1.523  | -4.294 | 0.423  |
| Si    | 0.178  | -2.907 | 1.988  | 0.140  | -2.931 | 1.987  |
| Si    | 2.073  | -2.971 | -1.947 | 2.223  | -3.002 | -1.884 |
| Si    | 1.402  | -0.928 | 1.197  | 1.425  | -0.961 | 1.155  |
| No.18 | PW91   |        |        | BLYP   |        |        |
| Si    | -2.147 | 1.014  | -0.321 | -2.133 | 1.001  | -0.321 |
| Si    | 1.515  | 1.381  | -2.016 | 1.536  | 1.415  | -2.044 |
| Si    | -0.967 | 4.182  | 2.507  | -0.965 | 4.280  | 2.534  |
| Si    | -0.657 | 2.326  | -1.538 | -0.687 | 2.359  | -1.588 |
| Si    | -3.428 | 1.917  | 1.374  | -3.454 | 1.911  | 1.369  |
| Si    | -1.021 | 1.817  | 1.916  | -1.071 | 1.863  | 2.087  |
| Si    | -1.137 | 4.652  | -1.397 | -1.210 | 4.719  | -1.401 |
| Si    | 1.166  | 1.893  | 0.276  | 1.181  | 1.985  | 0.266  |
| Si    | 1.078  | 0.752  | 2.377  | 1.104  | 0.792  | 2.366  |
| Si    | 0.257  | 4.061  | 0.472  | 0.247  | 4.168  | 0.461  |
| Si    | -2.288 | 3.936  | 0.586  | -2.352 | 4.014  | 0.639  |
| Si    | -1.265 | -1.161 | -0.337 | -1.230 | -1.190 | -0.368 |
| Si    | 2.490  | -2.330 | -0.225 | 2.558  | -2.371 | -0.216 |
| Si    | -1.144 | -3.202 | 0.910  | -1.178 | -3.237 | 0.932  |
| Si    | 0.881  | -0.844 | -1.430 | 0.946  | -0.876 | -1.482 |
| Si    | 0.466  | -4.327 | -0.663 | 0.400  | -4.428 | -0.687 |
| Si    | -0.915 | -2.772 | -2.071 | -0.910 | -2.798 | -2.157 |
| Cs    | 3.660  | -5.671 | -0.643 | 3.683  | -5.797 | -0.621 |
| Si    | 1.231  | -3.497 | 1.608  | 1.230  | -3.569 | 1.609  |
| Si    | 1.539  | -2.909 | -2.472 | 1.582  | -2.988 | -2.490 |
| Si    | 0.687  | -1.216 | 1.087  | 0.721  | -1.252 | 1.113  |
| No.19 | PW91   |        |        | BLYP   |        |        |
| Si    | -2.094 | 0.913  | -0.453 | -2.074 | 0.918  | -0.456 |
| Si    | 1.617  | 1.481  | -2.068 | 1.651  | 1.506  | -2.075 |
| Si    | -1.038 | 4.027  | 2.503  | -1.049 | 4.158  | 2.517  |
| Si    | -0.608 | 2.321  | -1.577 | -0.624 | 2.358  | -1.632 |
| Si    | -3.443 | 1.784  | 1.207  | -3.472 | 1.789  | 1.189  |
| Si    | -1.039 | 1.686  | 1.813  | -1.105 | 1.746  | 1.994  |
| Si    | -1.109 | 4.636  | -1.391 | -1.179 | 4.700  | -1.414 |
| Si    | 1.218  | 1.884  | 0.246  | 1.213  | 1.990  | 0.246  |
| Si    | 1.086  | 0.675  | 2.287  | 1.100  | 0.736  | 2.289  |
| Si    | 0.240  | 4.012  | 0.495  | 0.226  | 4.135  | 0.476  |

Part III: xyz Coordinates for Stationary Points

|                    |        |        |        |        |        |        |
|--------------------|--------|--------|--------|--------|--------|--------|
| Si                 | -2.312 | 3.836  | 0.544  | -2.380 | 3.921  | 0.580  |
| Si                 | -1.136 | -1.229 | -0.543 | -1.103 | -1.246 | -0.561 |
| Si                 | 2.738  | -2.154 | -0.249 | 2.802  | -2.208 | -0.223 |
| Si                 | -1.011 | -2.866 | 1.207  | -0.964 | -2.905 | 1.204  |
| Si                 | 1.097  | -0.702 | -1.350 | 1.159  | -0.737 | -1.382 |
| Si                 | 0.150  | -4.099 | -0.594 | 0.071  | -4.261 | -0.663 |
| Si                 | -0.990 | -2.913 | -2.298 | -1.001 | -2.962 | -2.352 |
| Si                 | 2.444  | -4.496 | -1.064 | 2.428  | -4.575 | -1.072 |
| Cs                 | 1.946  | -4.568 | 2.622  | 1.975  | -4.757 | 2.667  |
| Si                 | 1.425  | -2.839 | -2.432 | 1.447  | -2.908 | -2.476 |
| Si                 | 0.815  | -1.388 | 1.096  | 0.875  | -1.397 | 1.144  |
| No.20              | PW91   |        |        | BLYP   |        |        |
| Si                 | -1.991 | 0.755  | -0.043 | -2.017 | 0.766  | -0.065 |
| Si                 | 1.494  | 1.297  | -1.974 | 1.502  | 1.321  | -2.006 |
| Si                 | -1.007 | 4.217  | 2.454  | -0.982 | 4.307  | 2.487  |
| Si                 | -0.709 | 2.095  | -1.471 | -0.744 | 2.127  | -1.521 |
| Si                 | -3.267 | 1.631  | 1.666  | -3.310 | 1.669  | 1.648  |
| Si                 | -0.842 | 1.827  | 2.051  | -0.896 | 1.866  | 2.202  |
| Si                 | -1.448 | 4.353  | -1.461 | -1.482 | 4.431  | -1.457 |
| Si                 | 1.246  | 1.986  | 0.267  | 1.242  | 2.048  | 0.252  |
| Si                 | 1.386  | 0.997  | 2.430  | 1.386  | 1.012  | 2.420  |
| Si                 | 0.105  | 4.050  | 0.348  | 0.115  | 4.147  | 0.342  |
| Si                 | -2.406 | 3.676  | 0.639  | -2.446 | 3.794  | 0.693  |
| Si                 | -0.964 | -1.382 | -0.132 | -1.004 | -1.407 | -0.162 |
| Si                 | 2.762  | -2.169 | -0.140 | 2.821  | -2.176 | -0.129 |
| Si                 | -1.524 | -3.541 | 0.776  | -1.523 | -3.594 | 0.792  |
| Si                 | 1.168  | -1.046 | -1.547 | 1.208  | -1.062 | -1.583 |
| Si                 | 0.078  | -4.003 | -0.866 | 0.043  | -4.135 | -0.891 |
| Si                 | -0.695 | -2.244 | -2.368 | -0.671 | -2.301 | -2.394 |
| Si                 | 2.153  | -4.515 | 0.180  | 2.177  | -4.559 | 0.158  |
| Si                 | 0.702  | -3.244 | 1.584  | 0.732  | -3.338 | 1.632  |
| Cs                 | 2.559  | -3.786 | -3.512 | 2.640  | -3.893 | -3.582 |
| Si                 | 1.194  | -0.958 | 1.120  | 1.204  | -1.025 | 1.165  |
| No.21              | PW91   |        |        | BLYP   |        |        |
| Si                 | -1.301 | 0.678  | 0.348  | -1.315 | 0.655  | 0.346  |
| Si                 | 2.169  | 1.290  | -1.543 | 2.198  | 1.328  | -1.537 |
| Si                 | -1.752 | 4.755  | 1.531  | -1.801 | 4.815  | 1.552  |
| Si                 | -0.265 | 1.400  | -1.701 | -0.273 | 1.379  | -1.740 |
| Si                 | -3.466 | 1.336  | 1.042  | -3.501 | 1.363  | 1.050  |
| Si                 | -1.714 | 2.431  | 2.208  | -1.768 | 2.460  | 2.273  |
| Si                 | -1.429 | 3.517  | -2.171 | -1.465 | 3.550  | -2.195 |
| Si                 | 1.067  | 2.112  | 0.367  | 1.072  | 2.216  | 0.361  |
| Si                 | 0.308  | 1.065  | 2.340  | 0.329  | 1.159  | 2.361  |
| Si                 | -0.240 | 4.036  | -0.150 | -0.262 | 4.149  | -0.171 |
| Si                 | -2.691 | 3.324  | -0.115 | -2.773 | 3.409  | -0.121 |
| Si                 | 0.086  | -1.068 | 1.104  | 0.131  | -1.029 | 1.197  |
| Si                 | 3.246  | -2.803 | -0.633 | 3.268  | -2.851 | -0.632 |
| Si                 | -0.587 | -3.317 | 1.488  | -0.609 | -3.330 | 1.478  |
| Si                 | 1.942  | -0.831 | -0.385 | 1.968  | -0.841 | -0.371 |
| Si                 | -1.040 | -3.108 | -0.820 | -1.082 | -3.139 | -0.851 |
| Si                 | -0.166 | -1.040 | -1.722 | -0.122 | -1.096 | -1.820 |
| Si                 | 0.271  | -4.743 | -2.004 | 0.252  | -4.804 | -2.018 |
| Si                 | 1.223  | -4.028 | 0.034  | 1.220  | -4.129 | 0.045  |
| Si                 | 1.551  | -2.652 | -2.294 | 1.613  | -2.721 | -2.364 |
| Cs                 | 2.786  | -2.352 | 3.075  | 2.917  | -2.541 | 3.156  |
| LaSi <sub>20</sub> |        |        |        |        |        |        |
| Cage               | PW91   |        |        | BLYP   |        |        |
| Si                 | 2.729  | -1.121 | -1.606 | 2.766  | -1.133 | -1.621 |
| Si                 | 2.991  | 1.081  | -0.811 | 3.037  | 1.100  | -0.818 |
| Si                 | 0.833  | -1.114 | -3.052 | 0.840  | -1.127 | -3.089 |
| Si                 | 0.006  | 1.090  | -3.089 | 0.001  | 1.107  | -3.138 |
| Si                 | 1.348  | 2.491  | -1.749 | 1.364  | 2.522  | -1.774 |
| Si                 | -0.819 | -2.449 | -2.033 | -0.836 | -2.485 | -2.064 |
| Si                 | -2.638 | -1.084 | -1.497 | -2.672 | -1.096 | -1.518 |
| Si                 | -2.134 | 1.089  | -2.158 | -2.160 | 1.102  | -2.181 |
| Si                 | -0.008 | -3.331 | 0.002  | -0.010 | -3.373 | 0.002  |
| Si                 | -1.347 | -2.491 | 1.749  | -1.363 | -2.522 | 1.774  |
| Si                 | -2.990 | -1.081 | 0.811  | -3.037 | -1.100 | 0.818  |
| Si                 | 2.165  | -2.448 | 0.258  | 2.198  | -2.485 | 0.265  |
| Si                 | 2.135  | -1.089 | 2.158  | 2.161  | -1.102 | 2.181  |
| Si                 | -0.006 | -1.090 | 3.089  | -0.001 | -1.107 | 3.138  |
| Si                 | 2.638  | 1.084  | 1.498  | 2.672  | 1.096  | 1.519  |
| Si                 | 0.820  | 2.449  | 2.033  | 0.836  | 2.485  | 2.064  |
| Si                 | -0.833 | 1.114  | 3.053  | -0.840 | 1.127  | 3.090  |
| Si                 | -2.728 | 1.121  | 1.607  | -2.765 | 1.133  | 1.622  |
| Si                 | -2.165 | 2.448  | -0.258 | -2.198 | 2.485  | -0.265 |
| Si                 | 0.008  | 3.331  | -0.002 | 0.010  | 3.373  | -0.002 |
| La                 | 0.000  | -0.000 | 0.000  | 0.000  | -0.000 | 0.000  |
| No.1               | PW91   |        |        | BLYP   |        |        |
| La                 | -2.124 | 0.695  | 0.067  | -2.163 | 0.685  | 0.034  |
| Si                 | 1.262  | 1.149  | -2.303 | 1.246  | 1.220  | -2.353 |
| Si                 | -0.335 | 4.753  | 2.524  | -0.353 | 4.803  | 2.586  |
| Si                 | -0.981 | 2.034  | -2.224 | -1.033 | 2.133  | -2.242 |
| Si                 | -3.315 | 2.387  | 2.253  | -3.383 | 2.431  | 2.235  |
| Si                 | -1.060 | 2.470  | 2.675  | -1.115 | 2.486  | 2.705  |
| Si                 | -0.898 | 3.955  | -0.967 | -0.904 | 4.054  | -0.953 |
| Si                 | 0.801  | 2.169  | -0.198 | 0.855  | 2.226  | -0.201 |
| Si                 | 0.603  | 1.006  | 1.850  | 0.586  | 1.018  | 1.848  |
| Si                 | 0.905  | 4.501  | 0.381  | 0.928  | 4.588  | 0.391  |
| Si                 | -2.121 | 4.092  | 1.104  | -2.168 | 4.197  | 1.138  |
| Si                 | -1.435 | -2.234 | -0.487 | -1.464 | -2.292 | -0.495 |
| Si                 | 2.620  | -1.724 | 0.125  | 2.677  | -1.797 | 0.146  |
| Si                 | -0.557 | -4.400 | -0.087 | -0.577 | -4.470 | -0.021 |
| Si                 | 0.698  | -1.073 | -1.431 | 0.778  | -1.092 | -1.477 |
| Si                 | 1.040  | -5.142 | -1.792 | 0.959  | -5.258 | -1.796 |
| Si                 | -0.318 | -3.090 | -2.439 | -0.315 | -3.139 | -2.449 |
| Si                 | 2.073  | -4.109 | 0.175  | 2.124  | -4.229 | 0.153  |
| Si                 | 0.513  | -3.415 | 1.816  | 0.614  | -3.453 | 1.853  |
| Si                 | 2.276  | -2.837 | -2.038 | 2.351  | -2.901 | -2.084 |
| Si                 | 0.347  | -1.188 | 0.996  | 0.352  | -1.212 | 0.981  |
| No.2               | PW91   |        |        | BLYP   |        |        |
| Si                 | -1.833 | 0.872  | 0.019  | -1.819 | 0.877  | 0.065  |
| La                 | 0.615  | 2.021  | -1.989 | 0.683  | 2.059  | -1.975 |
| Si                 | -1.081 | 3.822  | 2.502  | -1.172 | 3.907  | 2.524  |
| Si                 | -2.250 | 2.459  | -1.766 | -2.221 | 2.460  | -1.782 |
| Si                 | -3.924 | 2.103  | -0.117 | -3.961 | 2.091  | -0.185 |
| Si                 | -0.445 | 1.630  | 1.735  | -0.451 | 1.697  | 1.806  |
| Si                 | -0.959 | 4.613  | -1.258 | -0.990 | 4.686  | -1.253 |
| Si                 | 1.861  | 1.862  | 0.596  | 1.927  | 2.060  | 0.654  |
| Si                 | 1.525  | 0.573  | 2.609  | 1.580  | 0.634  | 2.618  |
| Si                 | 0.377  | 3.789  | 0.642  | 0.369  | 3.922  | 0.707  |
| Si                 | -2.341 | 3.828  | 0.456  | -2.454 | 3.917  | 0.439  |
| Si                 | -0.929 | -1.268 | -0.294 | -0.893 | -1.282 | -0.261 |
| Si                 | 3.026  | -2.214 | -0.268 | 3.069  | -2.288 | -0.331 |
| Si                 | -0.782 | -3.034 | 1.364  | -0.820 | -3.131 | 1.343  |
| Si                 | 1.264  | -0.959 | -1.473 | 1.286  | -1.033 | -1.546 |
| Si                 | -0.029 | -4.459 | -0.439 | -0.045 | -4.586 | -0.452 |
| Si                 | -0.784 | -2.845 | -2.075 | -0.848 | -2.908 | -2.054 |
| Si                 | 2.392  | -4.826 | -0.507 | 2.400  | -4.918 | -0.518 |
| Si                 | 1.555  | -3.540 | 1.452  | 1.559  | -3.610 | 1.490  |
| Si                 | 1.558  | -3.235 | -2.194 | 1.530  | -3.334 | -2.296 |
| Si                 | 1.182  | -1.192 | 1.007  | 1.270  | -1.219 | 1.008  |
| No.3               | PW91   |        |        | BLYP   |        |        |
| Si                 | -2.418 | 0.580  | -0.306 | -2.447 | 0.572  | -0.295 |
| Si                 | 1.133  | 1.267  | -2.532 | 1.138  | 1.303  | -2.522 |
| La                 | -0.455 | 3.321  | 3.225  | -0.444 | 3.416  | 3.283  |
| Si                 | -0.914 | 2.069  | -1.497 | -0.986 | 2.082  | -1.574 |
| Si                 | -2.837 | 1.672  | 1.939  | -2.896 | 1.793  | 1.977  |
| Si                 | -0.637 | 1.494  | 1.012  | -0.686 | 1.577  | 1.019  |
| Si                 | -1.476 | 4.409  | -1.279 | -1.482 | 4.482  | -1.278 |
| Si                 | 1.457  | 2.085  | -0.314 | 1.445  | 2.190  | -0.293 |
| Si                 | 1.495  | 1.057  | 1.880  | 1.455  | 1.069  | 1.879  |
| Si                 | 0.266  | 4.040  | 0.401  | 0.306  | 4.207  | 0.449  |
| Si                 | -2.170 | 3.765  | 0.924  | -2.217 | 3.904  | 0.963  |

Part III: xyz Coordinates for Stationary Points

|      |        |        |        |        |        |        |
|------|--------|--------|--------|--------|--------|--------|
| Si   | -0.962 | -1.336 | -0.197 | -0.975 | -1.394 | -0.213 |
| Si   | 3.188  | -1.740 | -0.449 | 3.244  | -1.815 | -0.462 |
| Si   | -1.775 | -3.670 | -0.360 | -1.767 | -3.775 | -0.374 |
| Si   | 1.026  | -0.892 | -1.505 | 1.047  | -0.941 | -1.542 |
| Si   | 0.482  | -4.540 | -0.429 | 0.510  | -4.670 | -0.444 |
| Si   | -0.390 | -2.725 | -2.276 | -0.375 | -2.808 | -2.344 |
| Si   | 2.101  | -3.466 | 1.007  | 2.149  | -3.572 | 1.017  |
| Si   | -0.241 | -2.963 | 1.670  | -0.222 | -3.048 | 1.702  |
| Si   | 1.949  | -3.306 | -1.884 | 1.998  | -3.404 | -1.927 |
| Si   | 1.178  | -1.120 | 0.970  | 1.203  | -1.167 | 0.979  |
| No.4 | PW91   |        |        | BLYP   |        |        |
| Si   | -2.557 | 0.266  | 1.664  | -2.577 | 0.294  | 1.762  |
| Si   | 2.276  | 1.504  | -2.100 | 2.329  | 1.505  | -2.101 |
| Si   | -0.990 | 3.793  | 1.691  | -0.998 | 3.890  | 1.719  |
| La   | -0.750 | 1.258  | -0.782 | -0.774 | 1.251  | -0.813 |
| Si   | -3.792 | 1.564  | 0.076  | -3.853 | 1.580  | 0.150  |
| Si   | -0.785 | 1.585  | 2.352  | -0.785 | 1.662  | 2.397  |
| Si   | -1.301 | 4.154  | -1.179 | -1.356 | 4.213  | -1.217 |
| Si   | 2.018  | 2.444  | 0.002  | 2.043  | 2.499  | -0.000 |
| Si   | 1.355  | 1.070  | 1.795  | 1.351  | 1.097  | 1.800  |
| Si   | 0.654  | 4.399  | 0.142  | 0.644  | 4.476  | 0.110  |
| Si   | -2.938 | 3.763  | 0.415  | -2.969 | 3.815  | 0.428  |
| Si   | -1.285 | -1.454 | 0.619  | -1.320 | -1.450 | 0.702  |
| Si   | 2.935  | -2.331 | -0.094 | 2.983  | -2.356 | -0.023 |
| Si   | -1.329 | -3.799 | 1.024  | -1.368 | -3.833 | 0.962  |
| Si   | 1.653  | -0.672 | -1.353 | 1.697  | -0.714 | -1.367 |
| Si   | -0.234 | -3.887 | -1.035 | -0.232 | -3.995 | -1.113 |
| Si   | -0.657 | -1.664 | -2.056 | -0.621 | -1.711 | -2.156 |
| Si   | 2.090  | -4.575 | -0.893 | 2.127  | -4.647 | -0.914 |
| Si   | 1.115  | -3.570 | 1.226  | 1.106  | -3.670 | 1.241  |
| Si   | 1.462  | -2.772 | -2.509 | 1.509  | -2.818 | -2.582 |
| Si   | 1.056  | -1.075 | 0.991  | 1.062  | -1.089 | 1.012  |
| No.5 | PW91   |        |        | BLYP   |        |        |
| Si   | -2.459 | 0.566  | -0.397 | -2.394 | 0.573  | -0.419 |
| Si   | 1.473  | 1.428  | -1.896 | 1.514  | 1.487  | -1.879 |
| Si   | -1.110 | 3.783  | 1.687  | -1.171 | 3.908  | 1.760  |
| Si   | -0.760 | 1.865  | -1.340 | -0.758 | 1.960  | -1.402 |
| La   | -3.672 | 2.332  | 1.739  | -3.748 | 2.375  | 1.633  |
| Si   | -1.058 | 1.198  | 1.538  | -1.110 | 1.231  | 1.645  |
| Si   | -0.853 | 4.188  | -0.760 | -0.916 | 4.290  | -0.741 |
| Si   | 1.221  | 2.090  | 0.420  | 1.294  | 2.160  | 0.452  |
| Si   | 1.086  | 0.681  | 2.368  | 1.086  | 0.682  | 2.376  |
| Si   | 0.991  | 4.485  | 0.770  | 0.959  | 4.576  | 0.792  |
| Si   | -2.878 | 4.636  | 0.242  | -2.933 | 4.829  | 0.279  |
| Si   | -1.117 | -1.341 | -0.443 | -1.075 | -1.381 | -0.524 |
| Si   | 2.929  | -2.062 | -0.166 | 2.973  | -2.138 | -0.188 |
| Si   | -0.907 | -3.207 | 1.096  | -0.916 | -3.245 | 1.117  |
| Si   | 1.127  | -0.862 | -1.367 | 1.210  | -0.865 | -1.389 |
| Si   | 0.106  | -4.483 | -0.710 | 0.144  | -4.627 | -0.659 |
| Si   | -0.712 | -2.857 | -2.255 | -0.826 | -3.095 | -2.216 |
| Si   | 2.556  | -4.592 | -0.638 | 2.621  | -4.649 | -0.757 |
| Si   | 1.463  | -3.580 | 1.396  | 1.516  | -3.678 | 1.462  |
| Si   | 1.670  | -3.000 | -2.306 | 1.603  | -3.054 | -2.385 |
| Si   | 0.901  | -1.271 | 1.025  | 0.925  | -1.341 | 1.045  |
| No.6 | PW91   |        |        | BLYP   |        |        |
| Si   | -2.409 | 0.731  | -0.452 | -2.407 | 0.746  | -0.473 |
| Si   | 1.514  | 1.377  | -2.131 | 1.525  | 1.413  | -2.141 |
| Si   | -1.178 | 4.349  | 2.250  | -1.157 | 4.422  | 2.306  |
| Si   | -0.609 | 2.047  | -1.196 | -0.654 | 2.123  | -1.299 |
| Si   | -3.778 | 1.735  | 1.110  | -3.794 | 1.743  | 1.120  |
| La   | -0.925 | 1.304  | 2.317  | -0.940 | 1.332  | 2.373  |
| Si   | -1.125 | 4.399  | -1.409 | -1.184 | 4.483  | -1.392 |
| Si   | 1.597  | 1.949  | 0.227  | 1.619  | 2.041  | 0.231  |
| Si   | 2.048  | 0.852  | 2.239  | 2.053  | 0.873  | 2.239  |
| Si   | 0.280  | 3.831  | 0.505  | 0.281  | 3.935  | 0.508  |
| Si   | -2.451 | 3.533  | 0.434  | -2.527 | 3.651  | 0.518  |
| Si   | -1.056 | -1.114 | 0.020  | -1.066 | -1.141 | 0.001  |
| Si   | 2.823  | -2.183 | -0.328 | 2.874  | -2.259 | -0.345 |
| Si   | -1.259 | -3.355 | 0.863  | -1.287 | -3.422 | 0.822  |
| Si   | 0.990  | -0.837 | -1.405 | 1.019  | -0.871 | -1.456 |
| Si   | 0.103  | -4.247 | -0.803 | 0.129  | -4.361 | -0.824 |
| Si   | -0.840 | -2.387 | -2.153 | -0.843 | -2.468 | -2.189 |
| Si   | 2.393  | -4.629 | -0.187 | 2.420  | -4.731 | -0.081 |
| Si   | 1.080  | -3.372 | 1.439  | 1.059  | -3.430 | 1.492  |
| Si   | 1.575  | -2.973 | -2.437 | 1.607  | -3.028 | -2.505 |
| Si   | 1.225  | -1.007 | 1.094  | 1.271  | -1.048 | 1.094  |
| No.7 | PW91   |        |        | BLYP   |        |        |
| Si   | -2.122 | 0.869  | -0.326 | -1.996 | 0.909  | -0.363 |
| Si   | 1.639  | 1.349  | -2.002 | 1.711  | 1.402  | -2.020 |
| Si   | -1.094 | 3.879  | 2.488  | -1.016 | 4.023  | 2.524  |
| Si   | -0.575 | 2.235  | -1.473 | -0.561 | 2.319  | -1.604 |
| Si   | -3.343 | 1.801  | 1.465  | -3.372 | 1.721  | 1.355  |
| Si   | -0.867 | 1.590  | 1.747  | -0.966 | 1.643  | 2.013  |
| La   | -1.411 | 5.002  | -1.754 | -1.549 | 5.109  | -1.715 |
| Si   | 1.383  | 1.908  | 0.298  | 1.317  | 2.007  | 0.288  |
| Si   | 1.230  | 0.688  | 2.387  | 1.218  | 0.714  | 2.378  |
| Si   | 0.160  | 3.917  | 0.421  | 0.173  | 4.084  | 0.403  |
| Si   | -2.566 | 3.906  | 0.612  | -2.609 | 3.961  | 0.732  |
| Si   | -1.067 | -1.228 | -0.280 | -1.016 | -1.256 | -0.400 |
| Si   | 2.922  | -2.161 | -0.197 | 2.964  | -2.231 | -0.179 |
| Si   | -0.943 | -3.141 | 1.193  | -0.988 | -3.150 | 1.184  |
| Si   | 1.133  | -0.885 | -1.350 | 1.238  | -0.900 | -1.388 |
| Si   | -0.044 | -4.406 | -0.661 | -0.045 | -4.542 | -0.622 |
| Si   | -0.793 | -2.697 | -2.166 | -0.868 | -2.899 | -2.177 |
| Si   | 2.378  | -4.708 | -0.608 | 2.406  | -4.788 | -0.657 |
| Si   | 1.414  | -3.599 | 1.421  | 1.413  | -3.684 | 1.500  |
| Si   | 1.577  | -3.051 | -2.284 | 1.554  | -3.122 | -2.335 |
| Si   | 0.989  | -1.267 | 1.067  | 0.991  | -1.321 | 1.082  |
| No.8 | PW91   |        |        | BLYP   |        |        |
| Si   | -2.291 | 0.859  | 0.040  | -2.293 | 0.865  | 0.080  |
| Si   | 0.991  | 1.569  | -2.190 | 0.896  | 1.617  | -2.338 |
| Si   | 0.058  | 3.736  | 1.742  | 0.110  | 3.842  | 1.761  |
| Si   | -1.350 | 1.972  | -1.808 | -1.437 | 2.016  | -1.820 |
| Si   | -3.254 | 2.180  | 1.739  | -3.279 | 2.215  | 1.775  |
| Si   | -0.921 | 1.506  | 1.984  | -0.935 | 1.618  | 2.099  |
| Si   | -1.492 | 4.355  | -1.810 | -1.565 | 4.422  | -1.773 |
| La   | 2.069  | 1.512  | 1.066  | 2.072  | 1.484  | 0.993  |
| Si   | 0.501  | 0.122  | 3.213  | 0.550  | 0.213  | 3.266  |
| Si   | 0.411  | 3.395  | -0.658 | 0.407  | 3.472  | -0.710 |
| Si   | -1.927 | 3.798  | 0.454  | -1.940 | 3.959  | 0.549  |
| Si   | -1.353 | -1.296 | -0.134 | -1.229 | -1.267 | -0.007 |
| Si   | 2.654  | -1.641 | 0.150  | 2.650  | -1.621 | 0.149  |
| Si   | -1.059 | -3.559 | 0.667  | -1.207 | -3.718 | 0.331  |
| Si   | 0.811  | -0.530 | -1.022 | 0.851  | -0.581 | -1.221 |
| Si   | 0.364  | -4.235 | -1.131 | 0.518  | -4.394 | -1.246 |
| Si   | -0.625 | -2.322 | -2.233 | -0.657 | -2.407 | -2.223 |
| Si   | 2.724  | -4.153 | -0.620 | 2.840  | -4.127 | -0.345 |
| Si   | 1.281  | -3.597 | 1.322  | 1.068  | -3.747 | 1.360  |
| Si   | 1.866  | -2.331 | -2.203 | 1.985  | -2.434 | -2.277 |
| Si   | 0.538  | -1.339 | 1.434  | 0.590  | -1.427 | 1.597  |
| No.9 | PW91   |        |        | BLYP   |        |        |
| Si   | -1.299 | 1.049  | -0.080 | -1.319 | 1.053  | -0.090 |
| Si   | 2.576  | 1.214  | -1.353 | 2.627  | 1.233  | -1.331 |
| Si   | -0.985 | 3.584  | 1.951  | -1.040 | 3.701  | 1.995  |
| Si   | -1.764 | 2.414  | -2.041 | -1.731 | 2.509  | -2.062 |
| Si   | -3.147 | 2.117  | 1.140  | -3.230 | 2.103  | 1.159  |
| Si   | -1.398 | 1.239  | 2.418  | -1.439 | 1.325  | 2.463  |
| Si   | -1.719 | 4.202  | -0.398 | -1.739 | 4.348  | -0.422 |
| Si   | 0.497  | 2.276  | -1.267 | 0.536  | 2.327  | -1.250 |
| La   | 1.436  | 1.571  | 1.525  | 1.424  | 1.612  | 1.580  |
| Si   | 0.543  | 4.265  | 0.184  | 0.531  | 4.356  | 0.208  |
| Si   | -3.129 | 4.560  | 1.454  | -3.216 | 4.630  | 1.421  |
| Si   | -0.715 | -1.201 | -0.410 | -0.673 | -1.212 | -0.425 |
| Si   | 2.989  | -2.636 | 0.103  | 3.045  | -2.713 | 0.064  |

Part III: xyz Coordinates for Stationary Points

|       |        |        |        |        |        |        |
|-------|--------|--------|--------|--------|--------|--------|
| Si    | -1.018 | -3.091 | 1.095  | -1.013 | -3.130 | 1.099  |
| Si    | 1.636  | -0.928 | -1.009 | 1.704  | -0.968 | -1.046 |
| Si    | -0.121 | -4.387 | -0.807 | -0.111 | -4.524 | -0.791 |
| Si    | -0.647 | -2.654 | -2.300 | -0.743 | -2.780 | -2.262 |
| Si    | 2.260  | -4.969 | -0.764 | 2.304  | -5.042 | -0.856 |
| Si    | 1.232  | -3.996 | 1.390  | 1.278  | -4.082 | 1.445  |
| Si    | 1.692  | -3.067 | -2.183 | 1.654  | -3.126 | -2.275 |
| Si    | 1.075  | -1.563 | 1.351  | 1.147  | -1.620 | 1.375  |
| No.10 | PW91   |        |        | BLYP   |        |        |
| Si    | -2.216 | 0.909  | -0.302 | -2.209 | 0.905  | -0.377 |
| Si    | 1.339  | 1.197  | -2.635 | 1.387  | 1.264  | -2.635 |
| Si    | -2.205 | 3.171  | 2.847  | -2.180 | 3.190  | 2.927  |
| Si    | -0.776 | 2.018  | -1.842 | -0.762 | 2.089  | -1.879 |
| Si    | -3.870 | 2.338  | 0.901  | -3.898 | 2.352  | 0.804  |
| Si    | -1.111 | 1.376  | 1.748  | -1.181 | 1.401  | 1.749  |
| Si    | -0.123 | 4.194  | -1.009 | -0.193 | 4.265  | -0.998 |
| Si    | 1.297  | 2.232  | -0.476 | 1.363  | 2.338  | -0.467 |
| Si    | 1.344  | 1.141  | 1.729  | 1.284  | 1.140  | 1.768  |
| La    | 0.591  | 3.907  | 2.004  | 0.625  | 3.971  | 2.007  |
| Si    | -1.887 | 3.574  | 0.515  | -2.032 | 3.847  | 0.613  |
| Si    | -1.186 | -1.198 | -0.413 | -1.154 | -1.222 | -0.468 |
| Si    | 2.916  | -1.946 | -0.394 | 2.970  | -2.013 | -0.427 |
| Si    | -0.804 | -2.783 | 1.406  | -0.809 | -2.821 | 1.414  |
| Si    | 0.995  | -0.952 | -1.626 | 1.060  | -0.959 | -1.660 |
| Si    | 0.040  | -4.343 | -0.245 | 0.070  | -4.474 | -0.186 |
| Si    | -0.882 | -2.981 | -1.981 | -0.978 | -3.162 | -1.903 |
| Si    | 2.469  | -4.534 | -0.367 | 2.513  | -4.606 | -0.445 |
| Si    | 1.587  | -3.143 | 1.551  | 1.638  | -3.220 | 1.624  |
| Si    | 1.497  | -3.220 | -2.214 | 1.439  | -3.279 | -2.280 |
| Si    | 0.983  | -0.957 | 0.803  | 1.045  | -1.007 | 0.818  |
| No.11 | PW91   |        |        | BLYP   |        |        |
| Si    | -2.580 | 0.460  | -0.317 | -2.371 | 0.613  | -0.366 |
| Si    | 1.358  | 1.506  | -1.836 | 1.512  | 1.526  | -1.881 |
| Si    | -0.789 | 3.879  | 1.478  | -1.011 | 4.022  | 1.617  |
| Si    | -0.887 | 1.924  | -1.220 | -0.743 | 2.165  | -1.330 |
| Si    | -2.447 | 3.026  | 2.801  | -2.703 | 2.981  | 2.775  |
| Si    | -1.325 | 1.282  | 1.588  | -1.336 | 1.309  | 1.735  |
| Si    | -0.845 | 4.393  | -0.893 | -0.959 | 4.597  | -0.904 |
| Si    | 1.110  | 2.106  | 0.504  | 1.403  | 2.052  | 0.466  |
| Si    | 0.848  | 0.682  | 2.409  | 0.937  | 0.700  | 2.418  |
| Si    | 1.249  | 4.520  | 0.497  | 1.042  | 4.432  | 0.592  |
| La    | -3.362 | 3.279  | -0.116 | -3.470 | 3.341  | -0.154 |
| Si    | -1.137 | -1.360 | -0.486 | -1.063 | -1.327 | -0.594 |
| Si    | 2.872  | -2.025 | -0.103 | 2.919  | -2.115 | -0.152 |
| Si    | -1.050 | -3.315 | 0.906  | -1.034 | -3.223 | 0.995  |
| Si    | 1.094  | -0.841 | -1.369 | 1.199  | -0.841 | -1.414 |
| Si    | 0.081  | -4.446 | -0.896 | 0.062  | -4.576 | -0.777 |
| Si    | -0.599 | -2.688 | -2.416 | -0.796 | -2.973 | -2.348 |
| Si    | 2.521  | -4.578 | -0.582 | 2.543  | -4.650 | -0.733 |
| Si    | 1.289  | -3.593 | 1.331  | 1.365  | -3.686 | 1.410  |
| Si    | 1.781  | -2.948 | -2.311 | 1.637  | -3.027 | -2.402 |
| Si    | 0.816  | -1.260 | 1.028  | 0.866  | -1.318 | 1.046  |
| No.12 | PW91   |        |        | BLYP   |        |        |
| Si    | -1.929 | 0.669  | 0.321  | -1.899 | 0.696  | 0.325  |
| Si    | 1.103  | 1.233  | -2.524 | 1.188  | 1.264  | -2.498 |
| Si    | -0.834 | 4.058  | 1.754  | -0.884 | 4.158  | 1.783  |
| Si    | -0.715 | 2.015  | -1.165 | -0.765 | 2.071  | -1.251 |
| Si    | -2.440 | 1.988  | 2.282  | -2.655 | 2.074  | 2.177  |
| Si    | -0.159 | 1.523  | 1.830  | -0.347 | 1.623  | 2.185  |
| Si    | -1.513 | 4.281  | -0.864 | -1.527 | 4.363  | -0.935 |
| Si    | 1.673  | 1.876  | -0.307 | 1.587  | 1.957  | -0.230 |
| Si    | 2.046  | 0.609  | 1.746  | 1.855  | 0.670  | 1.887  |
| Si    | 0.657  | 4.019  | -0.052 | 0.635  | 4.130  | -0.041 |
| Si    | -3.030 | 4.209  | 1.136  | -3.079 | 4.416  | 1.079  |
| La    | -2.015 | -2.015 | -1.063 | -2.002 | -2.039 | -0.977 |
| Si    | 2.757  | -1.345 | 0.094  | 3.269  | -1.772 | -0.152 |
| Si    | -1.654 | -4.548 | 0.503  | -1.635 | -4.560 | 0.659  |
| Si    | 0.791  | -0.941 | -1.576 | 0.882  | -0.952 | -1.542 |
| Si    | 0.376  | -4.237 | -0.654 | 0.316  | -4.401 | -0.695 |
| Si    | 0.261  | -2.989 | -2.768 | 0.192  | -3.035 | -2.813 |
| Si    | 2.194  | -3.638 | 0.843  | 2.247  | -3.888 | 0.710  |
| Si    | -0.085 | -3.066 | 1.449  | 0.066  | -3.107 | 1.478  |
| Si    | 2.413  | -2.874 | -1.738 | 2.390  | -2.867 | -1.959 |
| Si    | 0.101  | -0.831 | 0.751  | 0.164  | -0.804 | 0.809  |
| No.13 | PW91   |        |        | BLYP   |        |        |
| Si    | -2.042 | 0.777  | -0.002 | -2.134 | 0.806  | -0.027 |
| Si    | 1.329  | 0.959  | -2.130 | 1.280  | 0.942  | -2.195 |
| Si    | -0.518 | 4.279  | 2.488  | -0.480 | 4.331  | 2.517  |
| Si    | -0.733 | 2.060  | -1.483 | -0.765 | 2.083  | -1.495 |
| Si    | -3.185 | 1.946  | 1.626  | -3.221 | 2.017  | 1.639  |
| Si    | -0.833 | 1.918  | 2.160  | -0.881 | 1.946  | 2.283  |
| Si    | -1.092 | 4.424  | -1.388 | -1.104 | 4.487  | -1.379 |
| Si    | 1.082  | 1.710  | 0.200  | 1.119  | 1.761  | 0.165  |
| Si    | 1.043  | 0.390  | 2.297  | 1.017  | 0.411  | 2.282  |
| Si    | 0.472  | 3.944  | 0.357  | 0.506  | 4.020  | 0.353  |
| Si    | -2.108 | 3.939  | 0.746  | -2.120 | 4.051  | 0.798  |
| Si    | -1.786 | -1.515 | -0.491 | -1.808 | -1.489 | -0.468 |
| La    | 2.945  | -0.592 | 0.080  | 2.980  | -0.585 | 0.080  |
| Si    | -1.066 | -3.386 | 1.134  | -1.125 | -3.477 | 1.097  |
| Si    | 0.331  | -1.147 | -1.645 | 0.278  | -1.194 | -1.720 |
| Si    | 0.006  | -4.230 | -0.865 | 0.015  | -4.326 | -0.901 |
| Si    | 0.173  | -3.108 | -2.992 | 0.275  | -3.200 | -3.038 |
| Si    | 2.146  | -5.025 | -0.350 | 2.165  | -5.084 | -0.339 |
| Si    | 1.557  | -3.173 | 1.033  | 1.640  | -3.210 | 1.076  |
| Si    | 2.147  | -2.915 | -1.669 | 2.237  | -2.950 | -1.674 |
| Si    | 0.130  | -1.256 | 0.894  | 0.127  | -1.340 | 0.946  |
| No.14 | PW91   |        |        | BLYP   |        |        |
| Si    | -1.638 | 0.672  | -0.722 | -1.728 | 0.668  | -0.798 |
| Si    | 1.885  | 1.867  | -2.083 | 1.872  | 1.861  | -2.127 |
| Si    | -1.254 | 3.514  | 2.720  | -1.242 | 3.588  | 2.764  |
| Si    | -0.426 | 2.426  | -1.647 | -0.462 | 2.442  | -1.671 |
| Si    | -3.237 | 1.054  | 0.899  | -3.254 | 1.088  | 0.907  |
| Si    | -0.924 | 1.316  | 1.825  | -0.935 | 1.327  | 1.998  |
| Si    | -1.344 | 4.540  | -1.074 | -1.363 | 4.590  | -1.057 |
| Si    | 1.229  | 1.794  | 0.265  | 1.304  | 1.890  | 0.266  |
| Si    | 1.321  | 0.507  | 2.290  | 1.371  | 0.544  | 2.252  |
| Si    | 0.043  | 3.778  | 0.734  | 0.068  | 3.857  | 0.755  |
| Si    | -2.481 | 3.353  | 0.688  | -2.509 | 3.414  | 0.747  |
| Si    | -0.108 | -1.140 | -0.776 | -0.220 | -1.162 | -0.854 |
| Si    | 2.735  | -2.069 | -0.693 | 2.842  | -2.117 | -0.656 |
| La    | -1.723 | -1.879 | 1.401  | -1.796 | -1.913 | 1.371  |
| Si    | 1.686  | -0.549 | -2.204 | 1.705  | -0.591 | -2.128 |
| Si    | 0.531  | -3.913 | 0.148  | 0.564  | -4.038 | 0.193  |
| Si    | -1.278 | -3.187 | -1.377 | -1.216 | -3.318 | -1.429 |
| Si    | 2.258  | -4.243 | -1.482 | 2.267  | -4.277 | -1.480 |
| Si    | 0.572  | -3.490 | 2.443  | 0.528  | -3.461 | 2.468  |
| Si    | 0.766  | -2.708 | -2.610 | 0.809  | -2.751 | -2.752 |
| Si    | 1.383  | -1.646 | 1.255  | 1.392  | -1.643 | 1.233  |
| No.15 | PW91   |        |        | BLYP   |        |        |
| Si    | -1.744 | 0.353  | 0.532  | -1.832 | 0.326  | 0.596  |
| Si    | 1.881  | 1.437  | -1.657 | 1.927  | 1.488  | -1.598 |
| Si    | -1.627 | 3.869  | 2.382  | -1.642 | 3.913  | 2.377  |
| Si    | -0.332 | 2.356  | -1.416 | -0.306 | 2.466  | -1.625 |
| Si    | -2.752 | 1.531  | -1.210 | -2.773 | 1.533  | -1.193 |
| Si    | -0.627 | 1.736  | 2.030  | -0.663 | 1.731  | 2.069  |
| Si    | -0.761 | 4.673  | -1.369 | -0.754 | 4.774  | -1.369 |
| Si    | 1.464  | 2.120  | 0.586  | 1.484  | 2.186  | 0.636  |
| Si    | 1.612  | 1.046  | 2.718  | 1.604  | 1.002  | 2.730  |
| Si    | 0.148  | 4.067  | 0.752  | 0.171  | 4.145  | 0.773  |
| Si    | -2.284 | 3.526  | 0.080  | -2.308 | 3.583  | 0.038  |
| Si    | -0.553 | -1.603 | 0.465  | -0.645 | -1.655 | 0.533  |
| Si    | 1.766  | -0.789 | -0.821 | 1.835  | -0.783 | -0.873 |
| Si    | -0.638 | -3.882 | 1.139  | -0.607 | -3.950 | 1.199  |
| La    | -0.710 | -0.509 | -2.500 | -0.737 | -0.509 | -2.483 |

Part III: xyz Coordinates for Stationary Points

|       |        |        |        |        |        |        |
|-------|--------|--------|--------|--------|--------|--------|
| Si    | -0.539 | -5.491 | -0.669 | -0.536 | -5.548 | -0.660 |
| Si    | -0.650 | -3.221 | -1.469 | -0.676 | -3.260 | -1.488 |
| Si    | 1.515  | -4.226 | -0.509 | 1.562  | -4.310 | -0.529 |
| Si    | 1.650  | -3.371 | 1.712  | 1.716  | -3.430 | 1.712  |
| Si    | 1.653  | -2.616 | -2.297 | 1.651  | -2.653 | -2.323 |
| Si    | 1.528  | -1.006 | 1.518  | 1.529  | -1.051 | 1.476  |
| No.16 | PW91   |        |        | BLYP   |        |        |
| Si    | -1.996 | 0.523  | -0.210 | -1.864 | 0.598  | -0.058 |
| Si    | 1.597  | 1.498  | -2.152 | 1.614  | 1.486  | -2.148 |
| Si    | -1.313 | 3.639  | 1.817  | -1.304 | 3.715  | 1.875  |
| Si    | -0.547 | 2.071  | -1.222 | -0.589 | 2.123  | -1.346 |
| Si    | -2.917 | 1.595  | 1.787  | -3.037 | 1.650  | 1.760  |
| Si    | -0.567 | 1.241  | 1.632  | -0.637 | 1.322  | 1.937  |
| Si    | -1.520 | 4.237  | -0.930 | -1.535 | 4.314  | -1.064 |
| Si    | 1.628  | 1.951  | 0.164  | 1.577  | 2.044  | 0.166  |
| Si    | 1.683  | 0.829  | 2.269  | 1.715  | 0.874  | 2.275  |
| Si    | 0.444  | 4.004  | 0.318  | 0.396  | 4.107  | 0.271  |
| Si    | -3.376 | 3.881  | 0.802  | -3.376 | 3.975  | 0.829  |
| Si    | -0.744 | -1.505 | -0.208 | -0.811 | -1.538 | -0.221 |
| Si    | 3.346  | -1.972 | -0.546 | 3.379  | -2.053 | -0.491 |
| Si    | -1.929 | -3.116 | 1.239  | -1.884 | -3.257 | 1.229  |
| Si    | 1.309  | -0.779 | -1.589 | 1.335  | -0.828 | -1.612 |
| La    | -0.587 | -4.618 | -0.973 | -0.582 | -4.732 | -1.053 |
| Si    | -0.354 | -2.139 | -2.568 | -0.359 | -2.176 | -2.604 |
| Si    | 2.095  | -4.012 | 0.113  | 2.115  | -4.152 | 0.056  |
| Si    | 0.367  | -2.984 | 1.505  | 0.415  | -3.057 | 1.487  |
| Si    | 1.803  | -3.262 | -2.120 | 1.843  | -3.317 | -2.188 |
| Si    | 1.571  | -1.085 | 0.874  | 1.582  | -1.099 | 0.902  |
| No.17 | PW91   |        |        | BLYP   |        |        |
| Si    | -1.943 | 0.709  | 0.155  | -1.955 | 0.724  | 0.156  |
| Si    | 1.126  | 1.429  | -2.395 | 1.139  | 1.426  | -2.401 |
| Si    | -0.673 | 4.279  | 2.397  | -0.661 | 4.378  | 2.411  |
| Si    | -1.022 | 2.098  | -1.473 | -1.046 | 2.118  | -1.505 |
| Si    | -2.932 | 1.589  | 2.043  | -2.966 | 1.632  | 2.041  |
| Si    | -0.484 | 1.880  | 1.994  | -0.501 | 1.934  | 2.149  |
| Si    | -1.822 | 4.333  | -1.360 | -1.852 | 4.387  | -1.359 |
| Si    | 1.219  | 2.100  | -0.116 | 1.236  | 2.179  | -0.119 |
| Si    | 1.796  | 1.146  | 2.007  | 1.791  | 1.159  | 1.999  |
| Si    | 0.041  | 4.121  | 0.141  | 0.044  | 4.216  | 0.130  |
| Si    | -2.365 | 3.665  | 0.885  | -2.402 | 3.768  | 0.931  |
| Si    | -0.801 | -1.332 | -0.021 | -0.839 | -1.355 | -0.045 |
| Si    | 2.744  | -2.975 | 0.866  | 2.828  | -2.979 | 0.810  |
| Si    | -1.411 | -3.605 | 0.249  | -1.407 | -3.673 | 0.199  |
| Si    | 0.991  | -0.800 | -1.530 | 1.004  | -0.843 | -1.546 |
| Si    | 1.436  | -4.868 | -2.341 | 1.443  | -4.946 | -2.347 |
| La    | -0.816 | -2.942 | -2.588 | -0.816 | -3.007 | -2.642 |
| Si    | 0.907  | -4.244 | -0.158 | 0.990  | -4.360 | -0.106 |
| Si    | 0.228  | -2.853 | 1.926  | 0.157  | -2.922 | 1.947  |
| Si    | 2.328  | -2.809 | -1.548 | 2.372  | -2.876 | -1.599 |
| Si    | 1.450  | -0.923 | 0.871  | 1.439  | -0.962 | 0.898  |
| No.18 | PW91   |        |        | BLYP   |        |        |
| Si    | -2.068 | 0.811  | -0.215 | -2.046 | 0.806  | -0.198 |
| Si    | 1.512  | 1.366  | -2.075 | 1.523  | 1.388  | -2.085 |
| Si    | -0.949 | 4.214  | 2.410  | -0.934 | 4.322  | 2.417  |
| Si    | -0.702 | 2.170  | -1.524 | -0.736 | 2.189  | -1.570 |
| Si    | -3.323 | 1.750  | 1.490  | -3.330 | 1.754  | 1.498  |
| Si    | -0.913 | 1.823  | 1.949  | -0.946 | 1.887  | 2.127  |
| Si    | -1.308 | 4.471  | -1.497 | -1.377 | 4.511  | -1.507 |
| Si    | 1.241  | 1.941  | 0.218  | 1.248  | 2.031  | 0.212  |
| Si    | 1.277  | 0.933  | 2.386  | 1.297  | 0.970  | 2.371  |
| Si    | 0.190  | 4.044  | 0.336  | 0.185  | 4.148  | 0.306  |
| Si    | -2.337 | 3.790  | 0.567  | -2.387 | 3.867  | 0.619  |
| Si    | -1.045 | -1.282 | -0.121 | -1.019 | -1.308 | -0.136 |
| Si    | 2.758  | -2.138 | -0.004 | 2.801  | -2.181 | 0.020  |
| Si    | -1.257 | -3.480 | 0.806  | -1.291 | -3.549 | 0.743  |
| Si    | 1.086  | -0.839 | -1.304 | 1.152  | -0.872 | -1.336 |
| Si    | 0.043  | -4.396 | -0.963 | 0.029  | -4.500 | -1.027 |
| Si    | -0.739 | -2.462 | -2.259 | -0.735 | -2.523 | -2.307 |
| La    | 2.823  | -5.026 | -0.526 | 2.827  | -5.100 | -0.493 |
| Si    | 1.080  | -3.586 | 1.350  | 1.047  | -3.650 | 1.391  |
| Si    | 1.676  | -2.952 | -2.269 | 1.717  | -3.006 | -2.322 |
| Si    | 0.954  | -1.157 | 1.247  | 0.974  | -1.188 | 1.279  |
| No.19 | PW91   |        |        | BLYP   |        |        |
| Si    | -2.054 | 0.824  | -0.384 | -2.033 | 0.835  | -0.389 |
| Si    | 1.635  | 1.442  | -2.035 | 1.678  | 1.467  | -2.033 |
| Si    | -1.090 | 4.023  | 2.464  | -1.086 | 4.137  | 2.488  |
| Si    | -0.616 | 2.223  | -1.569 | -0.623 | 2.260  | -1.622 |
| Si    | -3.412 | 1.688  | 1.271  | -3.450 | 1.704  | 1.239  |
| Si    | -0.986 | 1.668  | 1.830  | -1.063 | 1.715  | 1.997  |
| Si    | -1.181 | 4.531  | -1.443 | -1.222 | 4.598  | -1.453 |
| Si    | 1.254  | 1.920  | 0.254  | 1.256  | 2.001  | 0.264  |
| Si    | 1.173  | 0.741  | 2.325  | 1.165  | 0.772  | 2.335  |
| Si    | 0.185  | 4.001  | 0.464  | 0.191  | 4.111  | 0.457  |
| Si    | -2.356 | 3.750  | 0.502  | -2.411 | 3.846  | 0.549  |
| Si    | -1.043 | -1.290 | -0.427 | -1.038 | -1.316 | -0.460 |
| Si    | 2.907  | -2.126 | -0.145 | 2.962  | -2.171 | -0.133 |
| Si    | -0.946 | -2.800 | 1.382  | -0.955 | -2.841 | 1.378  |
| Si    | 1.234  | -0.767 | -1.279 | 1.303  | -0.802 | -1.309 |
| Si    | -0.134 | -4.137 | -0.599 | -0.145 | -4.268 | -0.610 |
| Si    | -0.908 | -2.746 | -2.331 | -0.949 | -2.858 | -2.344 |
| Si    | 2.324  | -4.506 | -0.855 | 2.361  | -4.580 | -0.890 |
| La    | 1.506  | -4.212 | 1.848  | 1.531  | -4.291 | 1.855  |
| Si    | 1.520  | -2.899 | -2.416 | 1.522  | -2.968 | -2.483 |
| Si    | 0.980  | -1.331 | 1.145  | 1.000  | -1.352 | 1.165  |
| No.20 | PW91   |        |        | BLYP   |        |        |
| Si    | -2.077 | 0.783  | -0.254 | -2.067 | 0.783  | -0.242 |
| Si    | 1.569  | 1.368  | -1.964 | 1.572  | 1.400  | -1.997 |
| Si    | -1.074 | 4.069  | 2.485  | -1.040 | 4.182  | 2.507  |
| Si    | -0.663 | 2.164  | -1.506 | -0.706 | 2.195  | -1.559 |
| Si    | -3.412 | 1.695  | 1.393  | -3.433 | 1.707  | 1.399  |
| Si    | -0.978 | 1.701  | 1.907  | -1.023 | 1.742  | 2.074  |
| Si    | -1.245 | 4.470  | -1.428 | -1.321 | 4.529  | -1.438 |
| Si    | 1.238  | 1.915  | 0.306  | 1.240  | 2.006  | 0.288  |
| Si    | 1.204  | 0.799  | 2.421  | 1.243  | 0.840  | 2.402  |
| Si    | 0.164  | 3.997  | 0.465  | 0.166  | 4.113  | 0.437  |
| Si    | -2.382 | 3.740  | 0.558  | -2.436 | 3.837  | 0.626  |
| Si    | -1.058 | -1.328 | -0.233 | -1.055 | -1.359 | -0.246 |
| Si    | 2.917  | -2.093 | -0.195 | 2.976  | -2.140 | -0.188 |
| Si    | -1.155 | -3.280 | 1.168  | -1.224 | -3.386 | 1.103  |
| Si    | 1.169  | -0.942 | -1.483 | 1.221  | -0.957 | -1.512 |
| Si    | -0.080 | -4.128 | -0.745 | -0.091 | -4.248 | -0.793 |
| Si    | -0.661 | -2.284 | -2.359 | -0.636 | -2.312 | -2.401 |
| Si    | 2.328  | -4.568 | -0.249 | 2.351  | -4.654 | -0.215 |
| Si    | 1.244  | -3.453 | 1.561  | 1.205  | -3.535 | 1.599  |
| La    | 1.872  | -3.531 | -2.857 | 1.936  | -3.614 | -2.874 |
| Si    | 1.071  | -1.093 | 1.009  | 1.115  | -1.131 | 1.028  |
| No.21 | PW91   |        |        | BLYP   |        |        |
| Si    | -1.163 | 0.708  | 0.849  | -1.258 | 0.712  | 0.784  |
| Si    | 1.665  | 1.237  | -1.866 | 1.679  | 1.270  | -1.867 |
| Si    | -1.258 | 5.073  | 1.722  | -1.264 | 5.148  | 1.815  |
| Si    | -0.632 | 1.752  | -1.276 | -0.638 | 1.864  | -1.292 |
| Si    | -3.051 | 1.709  | 1.929  | -3.131 | 1.790  | 1.888  |
| Si    | -1.111 | 2.889  | 2.570  | -1.190 | 2.938  | 2.679  |
| Si    | -1.795 | 3.757  | -1.822 | -1.777 | 3.929  | -1.812 |
| Si    | 1.240  | 2.150  | 0.305  | 1.252  | 2.225  | 0.330  |
| Si    | 0.696  | 1.361  | 2.471  | 0.608  | 1.374  | 2.479  |
| Si    | -0.066 | 4.098  | -0.135 | -0.027 | 4.231  | -0.097 |
| Si    | -2.555 | 3.545  | 0.452  | -2.628 | 3.718  | 0.475  |
| Si    | -0.954 | -1.542 | -0.196 | -0.946 | -1.574 | -0.201 |
| Si    | 3.082  | -2.259 | 0.026  | 3.146  | -2.330 | -0.049 |
| Si    | -0.831 | -3.722 | 0.885  | -0.785 | -3.784 | 0.923  |
| Si    | 1.296  | -0.862 | -0.779 | 1.322  | -0.931 | -0.861 |
| Si    | -0.340 | -4.065 | -1.404 | -0.338 | -4.246 | -1.377 |
| Si    | -0.345 | -1.910 | -2.533 | -0.419 | -2.092 | -2.561 |

Part III: xyz Coordinates for Stationary Points

|                    |        |        |        |        |        |        |
|--------------------|--------|--------|--------|--------|--------|--------|
| Si                 | 1.673  | -5.306 | -1.683 | 1.730  | -5.437 | -1.652 |
| Si                 | 1.526  | -4.093 | 0.369  | 1.604  | -4.197 | 0.405  |
| Si                 | 1.994  | -2.895 | -2.042 | 2.051  | -2.976 | -2.149 |
| La                 | 0.924  | -1.624 | 2.157  | 1.007  | -1.630 | 2.138  |
| EuSi <sub>20</sub> |        |        |        |        |        |        |
| Cage               | PW91   |        |        | BLYP   |        |        |
| Si                 | 13.145 | 10.158 | 15.835 | 13.046 | 10.188 | 16.002 |
| Si                 | 11.622 | 11.944 | 15.817 | 11.634 | 12.034 | 15.705 |
| Si                 | 9.445  | 11.276 | 15.369 | 9.442  | 11.275 | 15.392 |
| Si                 | 9.579  | 8.971  | 15.579 | 9.493  | 8.926  | 15.446 |
| Si                 | 11.782 | 8.188  | 15.693 | 11.709 | 8.267  | 15.813 |
| Si                 | 13.759 | 10.272 | 18.097 | 14.135 | 10.263 | 18.130 |
| Si                 | 11.684 | 13.301 | 17.692 | 11.678 | 13.295 | 17.697 |
| Si                 | 8.129  | 12.017 | 17.147 | 8.058  | 12.036 | 17.146 |
| Si                 | 8.193  | 8.208  | 17.267 | 8.202  | 8.260  | 17.291 |
| Si                 | 11.733 | 7.300  | 17.859 | 11.793 | 7.175  | 17.890 |
| Si                 | 13.106 | 12.198 | 19.197 | 13.097 | 12.147 | 19.173 |
| Si                 | 9.566  | 13.106 | 18.605 | 9.506  | 13.232 | 18.575 |
| Si                 | 7.540  | 10.135 | 18.367 | 7.164  | 10.144 | 18.334 |
| Si                 | 9.615  | 7.106  | 18.772 | 9.621  | 7.112  | 18.767 |
| Si                 | 13.170 | 8.390  | 19.316 | 13.241 | 8.371  | 19.318 |
| Si                 | 11.721 | 11.436 | 20.886 | 11.806 | 11.481 | 21.018 |
| Si                 | 9.518  | 12.219 | 20.771 | 9.590  | 12.140 | 20.652 |
| Si                 | 8.154  | 10.249 | 20.629 | 8.253  | 10.219 | 20.461 |
| Si                 | 9.677  | 8.462  | 20.648 | 9.666  | 8.373  | 20.759 |
| Si                 | 11.853 | 9.131  | 21.094 | 11.857 | 9.132  | 21.072 |
| Eu                 | 10.650 | 10.203 | 18.232 | 10.650 | 10.203 | 18.232 |
| No.1               | PW91   |        |        | BLYP   |        |        |
| Eu                 | -2.375 | 0.758  | 0.362  | -2.456 | 0.698  | 0.286  |
| Si                 | 1.505  | 1.193  | -2.322 | 1.440  | 1.221  | -2.362 |
| Si                 | -0.378 | 4.985  | 2.383  | -0.369 | 4.983  | 2.477  |
| Si                 | -0.845 | 1.413  | -1.985 | -0.896 | 1.694  | -1.985 |
| Si                 | -2.990 | 2.432  | 2.717  | -3.135 | 2.489  | 2.611  |
| Si                 | -0.730 | 2.613  | 2.721  | -0.859 | 2.581  | 2.736  |
| Si                 | -1.268 | 3.639  | -1.186 | -1.220 | 3.924  | -1.192 |
| Si                 | 0.728  | 2.087  | -0.163 | 0.860  | 2.182  | -0.162 |
| Si                 | 0.769  | 0.982  | 1.900  | 0.730  | 1.004  | 1.889  |
| Si                 | 0.429  | 4.393  | 0.210  | 0.517  | 4.489  | 0.278  |
| Si                 | -2.125 | 3.960  | 1.052  | -2.148 | 4.115  | 1.057  |
| Si                 | -1.351 | -1.889 | -0.789 | -1.394 | -2.056 | -0.703 |
| Si                 | 2.638  | -1.852 | 0.340  | 2.691  | -1.905 | 0.302  |
| Si                 | -0.719 | -4.156 | -0.351 | -0.701 | -4.319 | -0.251 |
| Si                 | 1.007  | -1.003 | -1.400 | 0.988  | -1.057 | -1.464 |
| Si                 | 0.944  | -5.074 | -1.871 | 0.933  | -5.204 | -1.864 |
| Si                 | -0.090 | -2.863 | -2.590 | -0.162 | -2.976 | -2.583 |
| Si                 | 1.874  | -4.179 | 0.207  | 1.989  | -4.289 | 0.191  |
| Si                 | 0.221  | -3.403 | 1.711  | 0.368  | -3.455 | 1.763  |
| Si                 | 2.463  | -2.882 | -1.905 | 2.491  | -2.935 | -1.975 |
| Si                 | 0.291  | -1.153 | 0.959  | 0.328  | -1.184 | 0.950  |
| No.2               | PW91   |        |        | BLYP   |        |        |
| Si                 | -1.405 | 1.016  | -0.129 | -1.641 | 0.938  | -0.001 |
| Eu                 | 0.718  | 1.546  | -2.618 | 0.941  | 1.820  | -2.481 |
| Si                 | -1.428 | 3.487  | 2.837  | -1.433 | 3.702  | 2.787  |
| Si                 | -1.731 | 2.972  | -1.619 | -1.801 | 2.784  | -1.666 |
| Si                 | -3.557 | 2.028  | -0.526 | -3.713 | 2.146  | -0.475 |
| Si                 | -0.498 | 1.445  | 2.000  | -0.565 | 1.585  | 1.995  |
| Si                 | -1.205 | 5.168  | -0.644 | -1.028 | 5.075  | -0.887 |
| Si                 | 1.184  | 2.046  | 0.232  | 1.416  | 2.101  | 0.425  |
| Si                 | 1.785  | 0.745  | 2.182  | 1.683  | 0.702  | 2.370  |
| Si                 | 0.001  | 3.952  | 1.046  | 0.108  | 4.031  | 1.037  |
| Si                 | -2.562 | 3.830  | 0.735  | -2.536 | 4.011  | 0.593  |
| Si                 | -0.550 | -1.118 | -0.719 | -0.779 | -1.239 | -0.437 |
| Si                 | 3.058  | -2.624 | -0.265 | 3.088  | -2.449 | -0.432 |
| Si                 | -0.760 | -2.524 | 1.324  | -0.743 | -2.889 | 1.397  |
| Si                 | 1.741  | -1.185 | -1.679 | 1.382  | -1.192 | -1.723 |
| Si                 | -0.163 | -4.405 | -0.142 | -0.115 | -4.610 | -0.242 |
| Si                 | -0.982 | -3.112 | -1.944 | -0.942 | -3.100 | -1.969 |
| Si                 | 2.173  | -5.056 | -0.411 | 2.301  | -5.062 | -0.440 |
| Si                 | 1.474  | -3.500 | 1.615  | 1.600  | -3.572 | 1.533  |
| Si                 | 1.360  | -3.521 | -2.108 | 1.424  | -3.562 | -2.247 |
| Si                 | 1.343  | -1.189 | 0.831  | 1.348  | -1.219 | 0.863  |
| No.3               | PW91   |        |        | BLYP   |        |        |
| Si                 | -2.380 | 0.605  | -0.328 | -2.350 | 0.616  | -0.284 |
| Si                 | 1.166  | 1.270  | -2.515 | 1.168  | 1.306  | -2.504 |
| Eu                 | -0.443 | 3.350  | 3.292  | -0.493 | 3.583  | 3.342  |
| Si                 | -0.871 | 2.127  | -1.480 | -0.934 | 2.136  | -1.552 |
| Si                 | -2.860 | 1.726  | 1.842  | -2.928 | 1.808  | 1.862  |
| Si                 | -0.659 | 1.490  | 1.065  | -0.670 | 1.560  | 1.152  |
| Si                 | -1.527 | 4.415  | -1.293 | -1.519 | 4.479  | -1.294 |
| Si                 | 1.430  | 2.035  | -0.274 | 1.407  | 2.136  | -0.240 |
| Si                 | 1.476  | 1.021  | 1.921  | 1.493  | 1.017  | 1.941  |
| Si                 | 0.212  | 3.981  | 0.301  | 0.244  | 4.145  | 0.367  |
| Si                 | -2.197 | 3.870  | 0.992  | -2.288 | 3.978  | 0.986  |
| Si                 | -0.957 | -1.347 | -0.182 | -0.963 | -1.410 | -0.191 |
| Si                 | 3.188  | -1.749 | -0.491 | 3.236  | -1.832 | -0.547 |
| Si                 | -1.770 | -3.677 | -0.344 | -1.778 | -3.764 | -0.387 |
| Si                 | 1.016  | -0.907 | -1.523 | 1.031  | -0.951 | -1.560 |
| Si                 | 0.489  | -4.546 | -0.423 | 0.503  | -4.683 | -0.443 |
| Si                 | -0.393 | -2.747 | -2.271 | -0.382 | -2.823 | -2.347 |
| Si                 | 2.135  | -3.473 | 0.989  | 2.184  | -3.582 | 0.984  |
| Si                 | -0.203 | -2.978 | 1.673  | -0.176 | -3.071 | 1.710  |
| Si                 | 1.947  | -3.335 | -1.900 | 1.977  | -3.456 | -1.953 |
| Si                 | 1.199  | -1.135 | 0.951  | 1.236  | -1.195 | 0.959  |
| No.4               | PW91   |        |        | BLYP   |        |        |
| Si                 | -2.496 | 0.283  | 1.615  | -2.516 | 0.305  | 1.646  |
| Si                 | 2.243  | 1.529  | -2.115 | 2.299  | 1.523  | -2.122 |
| Si                 | -0.967 | 3.786  | 1.732  | -0.978 | 3.862  | 1.786  |
| Eu                 | -0.737 | 1.237  | -0.795 | -0.776 | 1.256  | -0.891 |
| Si                 | -3.773 | 1.497  | 0.082  | -3.840 | 1.539  | 0.125  |
| Si                 | -0.783 | 1.608  | 2.488  | -0.793 | 1.662  | 2.548  |
| Si                 | -1.269 | 4.095  | -1.251 | -1.304 | 4.217  | -1.260 |
| Si                 | 2.053  | 2.441  | -0.011 | 2.065  | 2.506  | -0.021 |
| Si                 | 1.307  | 1.087  | 1.797  | 1.287  | 1.121  | 1.784  |
| Si                 | 0.634  | 4.312  | 0.113  | 0.628  | 4.396  | 0.118  |
| Si                 | -2.871 | 3.695  | 0.395  | -2.891 | 3.768  | 0.417  |
| Si                 | -1.259 | -1.471 | 0.590  | -1.275 | -1.480 | 0.627  |
| Si                 | 2.917  | -2.283 | -0.093 | 2.976  | -2.287 | -0.026 |
| Si                 | -1.362 | -3.807 | 1.012  | -1.373 | -3.848 | 0.991  |
| Si                 | 1.616  | -0.636 | -1.339 | 1.653  | -0.690 | -1.359 |
| Si                 | -0.252 | -3.867 | -1.052 | -0.248 | -4.011 | -1.114 |
| Si                 | -0.674 | -1.602 | -2.030 | -0.680 | -1.674 | -2.071 |
| Si                 | 2.090  | -4.529 | -0.873 | 2.142  | -4.594 | -0.873 |
| Si                 | 1.075  | -3.567 | 1.226  | 1.095  | -3.686 | 1.238  |
| Si                 | 1.448  | -2.742 | -2.504 | 1.455  | -2.800 | -2.576 |
| Si                 | 1.055  | -1.065 | 1.015  | 1.070  | -1.084 | 1.034  |
| No.5               | PW91   |        |        | BLYP   |        |        |
| Si                 | -2.397 | 0.647  | -0.293 | -2.353 | 0.657  | -0.275 |
| Si                 | 1.502  | 1.396  | -1.925 | 1.512  | 1.426  | -1.926 |
| Si                 | -1.169 | 3.807  | 1.643  | -1.203 | 3.910  | 1.692  |
| Si                 | -0.746 | 1.876  | -1.427 | -0.774 | 1.946  | -1.503 |
| Eu                 | -3.760 | 2.242  | 1.791  | -3.849 | 2.288  | 1.725  |
| Si                 | -0.998 | 1.283  | 1.638  | -1.050 | 1.322  | 1.774  |
| Si                 | -0.861 | 4.198  | -0.752 | -0.931 | 4.273  | -0.755 |
| Si                 | 1.253  | 2.035  | 0.368  | 1.312  | 2.104  | 0.379  |
| Si                 | 1.185  | 0.712  | 2.355  | 1.199  | 0.743  | 2.365  |
| Si                 | 0.952  | 4.413  | 0.756  | 0.921  | 4.499  | 0.737  |
| Si                 | -2.916 | 4.525  | 0.209  | -2.958 | 4.706  | 0.270  |
| Si                 | -1.109 | -1.306 | -0.388 | -1.070 | -1.336 | -0.392 |
| Si                 | 2.930  | -2.060 | -0.154 | 2.991  | -2.124 | -0.166 |
| Si                 | -0.945 | -3.228 | 1.064  | -0.976 | -3.320 | 1.029  |
| Si                 | 1.120  | -0.884 | -1.369 | 1.183  | -0.917 | -1.395 |
| Si                 | 0.069  | -4.439 | -0.760 | 0.083  | -4.576 | -0.778 |
| Si                 | -0.657 | -2.722 | -2.292 | -0.703 | -2.829 | -2.289 |
| Si                 | 2.494  | -4.649 | -0.591 | 2.533  | -4.733 | -0.610 |

Part III: xyz Coordinates for Stationary Points

|       |        |        |        |        |        |        |
|-------|--------|--------|--------|--------|--------|--------|
| Si    | 1.410  | -3.577 | 1.381  | 1.419  | -3.663 | 1.431  |
| Si    | 1.722  | -3.017 | -2.294 | 1.730  | -3.080 | -2.376 |
| Si    | 0.919  | -1.253 | 1.041  | 0.982  | -1.296 | 1.064  |
| No.6  | PW91   |        |        | BLYP   |        |        |
| Si    | -2.381 | 0.723  | -0.457 | -2.393 | 0.736  | -0.450 |
| Si    | 1.521  | 1.398  | -2.088 | 1.537  | 1.434  | -2.095 |
| Si    | -1.255 | 4.719  | 1.816  | -1.240 | 4.825  | 1.866  |
| Si    | -0.573 | 2.088  | -1.081 | -0.606 | 2.145  | -1.127 |
| Si    | -3.875 | 1.596  | 1.090  | -3.884 | 1.634  | 1.129  |
| Eu    | -0.946 | 1.338  | 2.314  | -0.963 | 1.401  | 2.384  |
| Si    | -1.164 | 4.495  | -1.214 | -1.229 | 4.551  | -1.254 |
| Si    | 1.685  | 1.835  | 0.295  | 1.727  | 1.934  | 0.313  |
| Si    | 2.017  | 0.790  | 2.354  | 2.020  | 0.800  | 2.366  |
| Si    | 0.392  | 3.721  | 0.586  | 0.378  | 3.807  | 0.574  |
| Si    | -2.536 | 3.334  | 0.402  | -2.614 | 3.473  | 0.468  |
| Si    | -1.013 | -1.122 | 0.013  | -1.025 | -1.151 | 0.003  |
| Si    | 2.867  | -2.180 | -0.364 | 2.911  | -2.243 | -0.383 |
| Si    | -1.191 | -3.294 | 1.009  | -1.233 | -3.387 | 0.926  |
| Si    | 1.017  | -0.835 | -1.391 | 1.039  | -0.867 | -1.438 |
| Si    | -0.024 | -4.209 | -0.793 | 0.026  | -4.338 | -0.836 |
| Si    | -0.853 | -2.339 | -2.179 | -0.868 | -2.425 | -2.209 |
| Si    | 2.317  | -4.646 | -0.378 | 2.369  | -4.744 | -0.289 |
| Si    | 1.169  | -3.405 | 1.384  | 1.142  | -3.479 | 1.438  |
| Si    | 1.540  | -2.986 | -2.418 | 1.579  | -3.033 | -2.502 |
| Si    | 1.281  | -1.022 | 1.102  | 1.324  | -1.076 | 1.117  |
| No.7  | PW91   |        |        | BLYP   |        |        |
| Si    | -2.317 | 0.750  | -0.254 | -2.021 | 0.869  | -0.340 |
| Si    | 1.539  | 1.402  | -1.920 | 1.694  | 1.413  | -1.988 |
| Si    | -1.161 | 3.805  | 2.411  | -0.937 | 4.004  | 2.494  |
| Si    | -0.682 | 2.147  | -1.203 | -0.616 | 2.311  | -1.574 |
| Si    | -3.294 | 2.016  | 1.577  | -3.346 | 1.741  | 1.388  |
| Si    | -0.933 | 1.416  | 1.714  | -1.040 | 1.578  | 2.136  |
| Eu    | -1.115 | 4.971  | -1.998 | -1.531 | 5.157  | -1.826 |
| Si    | 1.300  | 1.965  | 0.387  | 1.184  | 2.060  | 0.277  |
| Si    | 1.147  | 0.654  | 2.444  | 1.158  | 0.723  | 2.354  |
| Si    | 0.213  | 4.056  | 0.419  | 0.218  | 4.225  | 0.362  |
| Si    | -2.421 | 3.968  | 0.418  | -2.529 | 3.989  | 0.772  |
| Si    | -1.101 | -1.265 | -0.188 | -1.016 | -1.288 | -0.389 |
| Si    | 2.929  | -2.096 | -0.265 | 2.973  | -2.239 | -0.157 |
| Si    | -0.867 | -3.223 | 1.201  | -0.997 | -3.213 | 1.148  |
| Si    | 1.058  | -0.873 | -1.353 | 1.248  | -0.907 | -1.371 |
| Si    | 0.010  | -4.431 | -0.691 | -0.029 | -4.560 | -0.667 |
| Si    | -0.816 | -2.689 | -2.127 | -0.823 | -2.881 | -2.211 |
| Si    | 2.436  | -4.668 | -0.687 | 2.422  | -4.803 | -0.648 |
| Si    | 1.507  | -3.607 | 1.369  | 1.405  | -3.714 | 1.483  |
| Si    | 1.562  | -3.011 | -2.325 | 1.601  | -3.120 | -2.330 |
| Si    | 1.003  | -1.287 | 1.069  | 0.979  | -1.346 | 1.086  |
| No.8  | PW91   |        |        | BLYP   |        |        |
| Si    | -2.328 | 0.817  | -0.061 | -2.325 | 0.807  | -0.065 |
| Si    | 1.073  | 1.615  | -2.094 | 1.070  | 1.678  | -2.089 |
| Si    | -0.081 | 3.770  | 1.871  | -0.180 | 3.898  | 1.924  |
| Si    | -1.285 | 1.978  | -1.824 | -1.300 | 2.032  | -1.824 |
| Si    | -3.348 | 2.056  | 1.657  | -3.382 | 2.056  | 1.636  |
| Si    | -0.993 | 1.501  | 1.933  | -1.008 | 1.584  | 2.059  |
| Si    | -1.437 | 4.347  | -1.723 | -1.514 | 4.431  | -1.754 |
| Eu    | 2.280  | 1.574  | 1.017  | 2.315  | 1.711  | 1.005  |
| Si    | 0.572  | 0.268  | 3.097  | 0.648  | 0.313  | 3.090  |
| Si    | 0.373  | 3.357  | -0.484 | 0.357  | 3.533  | -0.478 |
| Si    | -1.988 | 3.771  | 0.512  | -2.081 | 3.908  | 0.525  |
| Si    | -1.343 | -1.309 | -0.231 | -1.261 | -1.310 | -0.204 |
| Si    | 2.698  | -1.699 | 0.103  | 2.785  | -1.828 | 0.098  |
| Si    | -1.028 | -3.431 | 0.859  | -1.101 | -3.529 | 0.778  |
| Si    | 0.859  | -0.553 | -1.064 | 0.975  | -0.604 | -1.104 |
| Si    | 0.240  | -4.229 | -1.025 | 0.218  | -4.365 | -1.080 |
| Si    | -0.618 | -2.362 | -2.293 | -0.641 | -2.428 | -2.307 |
| Si    | 2.625  | -4.284 | -0.671 | 2.626  | -4.415 | -0.627 |
| Si    | 1.353  | -3.514 | 1.310  | 1.291  | -3.642 | 1.365  |
| Si    | 1.815  | -2.436 | -2.210 | 1.847  | -2.540 | -2.292 |
| Si    | 0.559  | -1.238 | 1.320  | 0.659  | -1.291 | 1.344  |
| No.9  | PW91   |        |        | BLYP   |        |        |
| Si    | -2.003 | 0.855  | -0.141 | -2.000 | 0.852  | -0.072 |
| Si    | 1.501  | 1.344  | -1.753 | 1.557  | 1.378  | -1.750 |
| Si    | -0.512 | 4.184  | 1.814  | -0.678 | 4.439  | 1.814  |
| Si    | -0.941 | 1.986  | -1.936 | -0.907 | 1.996  | -1.865 |
| Si    | -3.266 | 1.432  | 1.736  | -3.320 | 1.559  | 1.748  |
| Si    | -0.838 | 1.686  | 2.015  | -0.886 | 1.944  | 2.124  |
| Si    | -1.253 | 4.211  | -0.946 | -1.311 | 4.274  | -1.042 |
| Si    | 0.425  | 2.564  | -0.009 | 0.547  | 2.727  | 0.018  |
| Eu    | 2.066  | 0.848  | 1.723  | 1.929  | 0.817  | 1.876  |
| Si    | 0.877  | 4.965  | 0.027  | 0.777  | 5.172  | -0.019 |
| Si    | -2.583 | 3.579  | 0.991  | -2.694 | 3.733  | 0.898  |
| Si    | -1.340 | -1.421 | -0.355 | -1.191 | -1.400 | -0.234 |
| Si    | 2.562  | -2.078 | 0.408  | 2.680  | -2.258 | 0.383  |
| Si    | -1.246 | -3.619 | 0.654  | -1.270 | -3.721 | 0.593  |
| Si    | 0.950  | -0.814 | -0.919 | 1.108  | -0.873 | -0.928 |
| Si    | 0.180  | -4.462 | -1.118 | 0.156  | -4.617 | -1.202 |
| Si    | -0.462 | -2.497 | -2.360 | -0.563 | -2.563 | -2.315 |
| Si    | 2.545  | -4.576 | -0.553 | 2.589  | -4.689 | -0.698 |
| Si    | 1.066  | -3.895 | 1.324  | 1.091  | -4.147 | 1.305  |
| Si    | 1.911  | -2.700 | -2.071 | 1.876  | -2.792 | -2.204 |
| Si    | 0.357  | -1.591 | 1.470  | 0.506  | -1.831 | 1.570  |
| No.10 | PW91   |        |        | BLYP   |        |        |
| Si    | -2.309 | 0.840  | -0.250 | -2.313 | 0.824  | -0.243 |
| Si    | 1.218  | 1.223  | -2.481 | 1.222  | 1.249  | -2.499 |
| Si    | -2.123 | 3.137  | 2.728  | -2.139 | 3.216  | 2.782  |
| Si    | -0.901 | 2.036  | -1.790 | -0.923 | 2.062  | -1.807 |
| Si    | -3.871 | 2.443  | 0.912  | -3.915 | 2.484  | 0.925  |
| Si    | -1.011 | 1.362  | 1.652  | -1.035 | 1.430  | 1.664  |
| Si    | -0.159 | 4.246  | -1.115 | -0.244 | 4.310  | -1.167 |
| Si    | 1.242  | 2.303  | -0.386 | 1.313  | 2.403  | -0.409 |
| Si    | 1.377  | 1.148  | 1.766  | 1.370  | 1.180  | 1.775  |
| Eu    | 0.637  | 3.987  | 2.067  | 0.667  | 4.067  | 2.105  |
| Si    | -1.852 | 3.590  | 0.429  | -1.936 | 3.778  | 0.479  |
| Si    | -1.163 | -1.207 | -0.373 | -1.141 | -1.246 | -0.361 |
| Si    | 2.931  | -1.977 | -0.381 | 2.993  | -2.033 | -0.378 |
| Si    | -0.827 | -2.876 | 1.348  | -0.885 | -3.013 | 1.307  |
| Si    | 0.996  | -0.996 | -1.609 | 1.048  | -1.021 | -1.628 |
| Si    | 0.045  | -4.381 | -0.308 | 0.057  | -4.509 | -0.343 |
| Si    | -0.839 | -2.936 | -2.017 | -0.858 | -3.000 | -2.033 |
| Si    | 2.475  | -4.558 | -0.330 | 2.508  | -4.635 | -0.320 |
| Si    | 1.553  | -3.172 | 1.547  | 1.532  | -3.249 | 1.606  |
| Si    | 1.550  | -3.253 | -2.225 | 1.580  | -3.308 | -2.295 |
| Si    | 1.030  | -0.959 | 0.814  | 1.097  | -0.990 | 0.839  |
| No.11 | PW91   |        |        | BLYP   |        |        |
| Si    | -2.175 | 0.868  | -0.099 | -2.230 | 0.772  | -0.291 |
| Si    | 1.570  | 1.406  | -2.058 | 1.657  | 1.481  | -1.981 |
| Si    | -1.575 | 4.120  | 1.707  | -1.313 | 4.150  | 1.675  |
| Si    | -0.475 | 2.292  | -1.094 | -0.548 | 2.337  | -1.188 |
| Si    | -2.898 | 2.060  | 2.120  | -2.840 | 2.769  | 2.711  |
| Si    | -0.691 | 1.575  | 1.689  | -1.167 | 1.389  | 1.777  |
| Si    | -0.924 | 4.636  | -0.861 | -0.982 | 4.725  | -0.949 |
| Si    | 1.619  | 1.828  | 0.299  | 1.603  | 1.881  | 0.364  |
| Si    | 1.382  | 0.668  | 2.414  | 1.090  | 0.685  | 2.433  |
| Si    | 0.595  | 3.879  | 0.734  | 0.736  | 4.058  | 0.570  |
| Eu    | -3.561 | 3.395  | -0.526 | -3.650 | 3.370  | -0.243 |
| Si    | -1.089 | -1.183 | -0.295 | -1.014 | -1.224 | -0.605 |
| Si    | 2.885  | -2.136 | -0.233 | 2.929  | -2.171 | -0.154 |
| Si    | -0.981 | -3.111 | 1.158  | -1.032 | -3.113 | 1.024  |
| Si    | 1.092  | -0.830 | -1.361 | 1.261  | -0.847 | -1.422 |
| Si    | -0.118 | -4.342 | -0.737 | 0.026  | -4.541 | -0.728 |
| Si    | -0.827 | -2.595 | -2.231 | -0.857 | -2.959 | -2.292 |
| Si    | 2.304  | -4.695 | -0.704 | 2.496  | -4.687 | -0.789 |
| Si    | 1.371  | -3.596 | 1.341  | 1.363  | -3.698 | 1.436  |
| Si    | 1.530  | -2.989 | -2.323 | 1.573  | -3.049 | -2.407 |

Part III: xyz Coordinates for Stationary Points

|       |        |        |        |        |        |        |
|-------|--------|--------|--------|--------|--------|--------|
| Si    | 0.964  | -1.252 | 1.060  | 0.897  | -1.329 | 1.059  |
| No.12 | PW91   |        |        | BLYP   |        |        |
| Si    | -1.941 | 0.640  | 0.445  | -1.892 | 0.654  | 0.431  |
| Si    | 1.033  | 1.164  | -2.503 | 1.138  | 1.177  | -2.474 |
| Si    | -0.861 | 4.122  | 1.742  | -0.904 | 4.207  | 1.760  |
| Si    | -0.771 | 1.950  | -1.118 | -0.803 | 1.990  | -1.209 |
| Si    | -2.438 | 2.072  | 2.342  | -2.624 | 2.096  | 2.251  |
| Si    | -0.160 | 1.598  | 1.888  | -0.312 | 1.679  | 2.192  |
| Si    | -1.503 | 4.248  | -0.923 | -1.556 | 4.298  | -0.973 |
| Si    | 1.640  | 1.800  | -0.287 | 1.574  | 1.921  | -0.211 |
| Si    | 2.016  | 0.597  | 1.780  | 1.883  | 0.716  | 1.930  |
| Si    | 0.629  | 3.921  | -0.059 | 0.597  | 4.073  | -0.075 |
| Si    | -3.043 | 4.226  | 1.054  | -3.100 | 4.398  | 1.033  |
| Eu    | -2.117 | -1.860 | -1.188 | -2.131 | -1.891 | -1.126 |
| Si    | 2.784  | -1.439 | 0.108  | 3.273  | -1.828 | -0.163 |
| Si    | -1.581 | -4.332 | 0.390  | -1.603 | -4.362 | 0.542  |
| Si    | 0.786  | -1.011 | -1.526 | 0.918  | -1.033 | -1.467 |
| Si    | 0.463  | -4.237 | -0.663 | 0.366  | -4.362 | -0.693 |
| Si    | 0.251  | -2.996 | -2.804 | 0.193  | -3.018 | -2.840 |
| Si    | 2.254  | -3.729 | 0.850  | 2.263  | -3.939 | 0.748  |
| Si    | 0.037  | -3.059 | 1.479  | 0.127  | -3.080 | 1.475  |
| Si    | 2.417  | -2.873 | -1.807 | 2.402  | -2.925 | -1.998 |
| Si    | 0.102  | -0.804 | 0.799  | 0.188  | -0.773 | 0.866  |
| No.13 | PW91   |        |        | BLYP   |        |        |
| Si    | -2.065 | 0.842  | -0.339 | -2.022 | 0.855  | -0.380 |
| Si    | 1.596  | 1.371  | -1.985 | 1.659  | 1.465  | -1.985 |
| Si    | -1.078 | 4.044  | 2.500  | -1.132 | 4.124  | 2.539  |
| Si    | -0.612 | 2.230  | -1.527 | -0.614 | 2.308  | -1.582 |
| Si    | -3.442 | 1.751  | 1.275  | -3.483 | 1.720  | 1.213  |
| Si    | -1.021 | 1.684  | 1.863  | -1.107 | 1.708  | 2.012  |
| Si    | -1.158 | 4.546  | -1.404 | -1.227 | 4.647  | -1.394 |
| Si    | 1.219  | 1.888  | 0.316  | 1.219  | 2.006  | 0.330  |
| Si    | 1.096  | 0.693  | 2.408  | 1.100  | 0.737  | 2.401  |
| Si    | 0.197  | 3.993  | 0.501  | 0.162  | 4.119  | 0.521  |
| Si    | -2.354 | 3.806  | 0.545  | -2.441 | 3.878  | 0.585  |
| Si    | -1.140 | -1.317 | -0.351 | -1.033 | -1.303 | -0.426 |
| Eu    | 3.567  | -2.074 | -0.183 | 3.669  | -2.285 | -0.230 |
| Si    | -0.962 | -3.134 | 1.301  | -0.976 | -3.132 | 1.317  |
| Si    | 1.036  | -0.852 | -1.349 | 1.189  | -0.832 | -1.358 |
| Si    | -0.128 | -4.313 | -0.691 | -0.151 | -4.420 | -0.655 |
| Si    | -0.792 | -2.666 | -2.351 | -0.898 | -2.848 | -2.345 |
| Si    | 2.212  | -4.739 | -0.652 | 2.183  | -4.836 | -0.705 |
| Si    | 1.373  | -3.536 | 1.360  | 1.383  | -3.612 | 1.441  |
| Si    | 1.549  | -2.988 | -2.255 | 1.489  | -3.044 | -2.321 |
| Si    | 0.904  | -1.231 | 1.018  | 1.028  | -1.256 | 1.022  |
| No.14 | PW91   |        |        | BLYP   |        |        |
| Si    | -1.503 | 0.661  | -0.629 | -1.573 | 0.659  | -0.693 |
| Si    | 1.892  | 1.875  | -2.125 | 1.909  | 1.884  | -2.142 |
| Si    | -1.175 | 3.619  | 2.694  | -1.192 | 3.721  | 2.718  |
| Si    | -0.439 | 2.409  | -1.708 | -0.459 | 2.437  | -1.728 |
| Si    | -3.071 | 0.953  | 1.054  | -3.077 | 0.986  | 1.075  |
| Si    | -0.825 | 1.367  | 1.948  | -0.834 | 1.422  | 2.066  |
| Si    | -1.446 | 4.479  | -1.118 | -1.460 | 4.549  | -1.143 |
| Si    | 1.226  | 1.777  | 0.202  | 1.311  | 1.891  | 0.235  |
| Si    | 1.429  | 0.608  | 2.278  | 1.441  | 0.623  | 2.282  |
| Si    | 0.055  | 3.809  | 0.640  | 0.072  | 3.912  | 0.644  |
| Si    | -2.413 | 3.270  | 0.717  | -2.458 | 3.352  | 0.740  |
| Si    | -0.113 | -1.194 | -0.740 | -0.191 | -1.228 | -0.760 |
| Si    | 2.664  | -1.981 | -0.568 | 2.749  | -2.040 | -0.552 |
| Eu    | -2.006 | -2.095 | 1.326  | -2.086 | -2.199 | 1.357  |
| Si    | 1.709  | -0.537 | -2.195 | 1.750  | -0.570 | -2.151 |
| Si    | 0.491  | -3.879 | 0.033  | 0.532  | -4.030 | 0.033  |
| Si    | -1.291 | -3.171 | -1.484 | -1.270 | -3.294 | -1.499 |
| Si    | 2.338  | -4.145 | -1.443 | 2.364  | -4.184 | -1.492 |
| Si    | 0.508  | -3.547 | 2.387  | 0.538  | -3.593 | 2.402  |
| Si    | 0.802  | -2.694 | -2.587 | 0.802  | -2.709 | -2.690 |
| Si    | 1.163  | -1.584 | 1.318  | 1.128  | -1.589 | 1.298  |
| No.15 | PW91   |        |        | BLYP   |        |        |
| Si    | -1.863 | 0.529  | 0.332  | -1.956 | 0.440  | 0.367  |
| Si    | 1.892  | 1.468  | -1.606 | 1.939  | 1.483  | -1.540 |
| Si    | -1.664 | 3.781  | 2.456  | -1.737 | 3.817  | 2.446  |
| Si    | -0.384 | 2.207  | -1.238 | -0.271 | 2.466  | -1.548 |
| Si    | -2.854 | 1.752  | -1.372 | -2.763 | 1.759  | -1.417 |
| Si    | -0.782 | 1.606  | 2.071  | -0.852 | 1.590  | 2.088  |
| Si    | -0.698 | 4.593  | -1.279 | -0.615 | 4.804  | -1.230 |
| Si    | 1.410  | 1.961  | 0.673  | 1.395  | 2.006  | 0.724  |
| Si    | 1.374  | 0.677  | 2.683  | 1.355  | 0.668  | 2.739  |
| Si    | 0.128  | 3.947  | 0.855  | 0.155  | 4.014  | 0.920  |
| Si    | -2.312 | 3.603  | 0.132  | -2.282 | 3.655  | 0.055  |
| Si    | -0.525 | -1.321 | 0.009  | -0.655 | -1.449 | 0.077  |
| Si    | 1.667  | -0.820 | -1.015 | 1.563  | -0.840 | -1.035 |
| Si    | -0.366 | -3.258 | 1.439  | -0.288 | -3.375 | 1.605  |
| Eu    | -0.679 | -0.462 | -2.841 | -0.851 | -0.456 | -2.804 |
| Si    | -0.612 | -5.197 | -0.123 | -0.534 | -5.265 | -0.099 |
| Si    | -0.565 | -3.203 | -1.447 | -0.607 | -3.298 | -1.488 |
| Si    | 1.547  | -4.181 | -0.477 | 1.618  | -4.275 | -0.530 |
| Si    | 2.007  | -3.583 | 1.846  | 2.135  | -3.607 | 1.810  |
| Si    | 1.653  | -2.773 | -2.400 | 1.617  | -2.801 | -2.443 |
| Si    | 1.623  | -1.326 | 1.302  | 1.631  | -1.337 | 1.303  |
| No.16 | PW91   |        |        | BLYP   |        |        |
| Si    | -1.998 | 0.523  | -0.205 | -1.830 | 0.599  | -0.031 |
| Si    | 1.591  | 1.505  | -2.137 | 1.622  | 1.492  | -2.142 |
| Si    | -1.310 | 3.642  | 1.810  | -1.305 | 3.726  | 1.878  |
| Si    | -0.549 | 2.081  | -1.199 | -0.586 | 2.143  | -1.337 |
| Si    | -2.932 | 1.630  | 1.776  | -3.037 | 1.665  | 1.760  |
| Si    | -0.592 | 1.235  | 1.646  | -0.635 | 1.340  | 1.979  |
| Si    | -1.480 | 4.261  | -0.935 | -1.530 | 4.339  | -1.074 |
| Si    | 1.616  | 1.911  | 0.184  | 1.566  | 2.034  | 0.182  |
| Si    | 1.645  | 0.787  | 2.293  | 1.724  | 0.860  | 2.303  |
| Si    | 0.472  | 3.996  | 0.335  | 0.410  | 4.127  | 0.272  |
| Si    | -3.352 | 3.928  | 0.760  | -3.375 | 4.006  | 0.816  |
| Si    | -0.762 | -1.526 | -0.223 | -0.835 | -1.573 | -0.258 |
| Si    | 3.369  | -1.900 | -0.552 | 3.398  | -1.991 | -0.479 |
| Si    | -1.840 | -3.153 | 1.211  | -1.828 | -3.300 | 1.155  |
| Si    | 1.249  | -0.766 | -1.632 | 1.294  | -0.827 | -1.653 |
| Eu    | -0.609 | -4.697 | -1.031 | -0.608 | -4.841 | -1.125 |
| Si    | -0.398 | -2.153 | -2.578 | -0.384 | -2.198 | -2.635 |
| Si    | 2.194  | -3.941 | 0.151  | 2.204  | -4.088 | 0.092  |
| Si    | 0.394  | -3.009 | 1.523  | 0.396  | -3.049 | 1.530  |
| Si    | 1.693  | -3.273 | -2.023 | 1.729  | -3.370 | -2.106 |
| Si    | 1.595  | -1.084 | 0.824  | 1.608  | -1.097 | 0.872  |
| No.17 | PW91   |        |        | BLYP   |        |        |
| Si    | -1.933 | 0.620  | 0.073  | -1.928 | 0.648  | 0.069  |
| Si    | 1.372  | 1.346  | -2.223 | 1.336  | 1.422  | -2.302 |
| Si    | -0.839 | 4.232  | 2.378  | -0.784 | 4.319  | 2.443  |
| Si    | -0.856 | 2.006  | -1.463 | -0.922 | 2.081  | -1.503 |
| Si    | -3.048 | 1.543  | 1.876  | -3.036 | 1.534  | 1.918  |
| Si    | -0.593 | 1.834  | 2.012  | -0.577 | 1.878  | 2.181  |
| Si    | -1.658 | 4.248  | -1.463 | -1.765 | 4.353  | -1.394 |
| Si    | 1.277  | 2.047  | 0.041  | 1.280  | 2.165  | -0.012 |
| Si    | 1.681  | 1.128  | 2.209  | 1.731  | 1.137  | 2.120  |
| Si    | 0.073  | 4.062  | 0.195  | 0.054  | 4.190  | 0.198  |
| Si    | -2.385 | 3.597  | 0.730  | -2.426 | 3.693  | 0.861  |
| Si    | -0.737 | -1.371 | 0.012  | -0.787 | -1.402 | -0.144 |
| Si    | 3.084  | -2.348 | -0.001 | 3.144  | -2.553 | 0.187  |
| Si    | -1.073 | -3.713 | -0.008 | -1.156 | -3.779 | -0.019 |
| Si    | 1.157  | -0.845 | -1.308 | 1.143  | -0.847 | -1.440 |
| Si    | 0.412  | -4.856 | -1.663 | 0.508  | -4.947 | -1.653 |
| Eu    | -0.930 | -2.423 | -2.818 | -0.837 | -2.639 | -2.958 |
| Si    | 1.520  | -4.171 | 0.327  | 1.474  | -4.277 | 0.401  |
| Si    | 0.107  | -2.964 | 1.932  | 0.029  | -2.949 | 1.935  |
| Si    | 1.963  | -2.972 | -1.991 | 2.103  | -3.026 | -1.923 |
| Si    | 1.406  | -1.002 | 1.157  | 1.414  | -1.003 | 1.037  |
| No.18 | PW91   |        |        | BLYP   |        |        |



Part III: xyz Coordinates for Stationary Points

|                    |        |        |        |        |        |        |
|--------------------|--------|--------|--------|--------|--------|--------|
| Si                 | -2.032 | 0.884  | -0.305 | -2.018 | 0.882  | -0.306 |
| Si                 | 1.579  | 1.417  | -2.026 | 1.605  | 1.452  | -2.045 |
| Si                 | -1.012 | 4.128  | 2.485  | -1.011 | 4.230  | 2.508  |
| Si                 | -0.642 | 2.267  | -1.553 | -0.667 | 2.300  | -1.600 |
| Si                 | -3.388 | 1.752  | 1.346  | -3.411 | 1.755  | 1.341  |
| Si                 | -0.992 | 1.760  | 1.930  | -1.045 | 1.802  | 2.082  |
| Si                 | -1.200 | 4.576  | -1.410 | -1.265 | 4.637  | -1.424 |
| Si                 | 1.188  | 1.898  | 0.269  | 1.202  | 1.993  | 0.266  |
| Si                 | 1.158  | 0.784  | 2.392  | 1.178  | 0.826  | 2.389  |
| Si                 | 0.213  | 4.032  | 0.456  | 0.206  | 4.144  | 0.440  |
| Si                 | -2.328 | 3.820  | 0.569  | -2.389 | 3.907  | 0.618  |
| Si                 | -1.077 | -1.255 | -0.336 | -1.038 | -1.275 | -0.352 |
| Si                 | 2.763  | -2.071 | -0.167 | 2.824  | -2.136 | -0.157 |
| Si                 | -1.107 | -3.203 | 1.067  | -1.160 | -3.278 | 1.027  |
| Si                 | 1.074  | -0.840 | -1.423 | 1.154  | -0.867 | -1.453 |
| Si                 | 0.023  | -4.406 | -0.711 | 0.006  | -4.511 | -0.738 |
| Si                 | -0.851 | -2.723 | -2.223 | -0.874 | -2.794 | -2.249 |
| Eu                 | 2.880  | -5.058 | -0.583 | 2.892  | -5.153 | -0.581 |
| Si                 | 1.288  | -3.539 | 1.379  | 1.271  | -3.608 | 1.431  |
| Si                 | 1.571  | -3.018 | -2.258 | 1.596  | -3.070 | -2.326 |
| Si                 | 0.886  | -1.206 | 1.102  | 0.939  | -1.239 | 1.127  |
| No.19              | PW91   |        |        | BLYP   |        |        |
| Si                 | -2.002 | 0.845  | -0.453 | -1.996 | 0.863  | -0.450 |
| Si                 | 1.718  | 1.541  | -2.005 | 1.745  | 1.543  | -2.007 |
| Si                 | -1.136 | 4.002  | 2.481  | -1.119 | 4.123  | 2.501  |
| Si                 | -0.556 | 2.286  | -1.575 | -0.572 | 2.315  | -1.631 |
| Si                 | -3.423 | 1.676  | 1.164  | -3.458 | 1.705  | 1.152  |
| Si                 | -1.028 | 1.660  | 1.823  | -1.105 | 1.710  | 1.988  |
| Si                 | -1.130 | 4.591  | -1.415 | -1.173 | 4.651  | -1.434 |
| Si                 | 1.259  | 1.943  | 0.285  | 1.254  | 2.010  | 0.294  |
| Si                 | 1.112  | 0.706  | 2.319  | 1.104  | 0.739  | 2.335  |
| Si                 | 0.189  | 4.021  | 0.511  | 0.201  | 4.127  | 0.494  |
| Si                 | -2.352 | 3.762  | 0.484  | -2.404 | 3.864  | 0.533  |
| Si                 | -0.962 | -1.258 | -0.517 | -0.970 | -1.275 | -0.530 |
| Si                 | 2.875  | -2.130 | -0.171 | 2.931  | -2.158 | -0.158 |
| Si                 | -0.959 | -2.816 | 1.303  | -0.974 | -2.878 | 1.282  |
| Si                 | 1.340  | -0.678 | -1.273 | 1.375  | -0.731 | -1.304 |
| Si                 | -0.056 | -4.211 | -0.526 | -0.059 | -4.342 | -0.553 |
| Si                 | -1.124 | -3.014 | -2.200 | -1.126 | -3.080 | -2.216 |
| Si                 | 2.326  | -4.496 | -0.979 | 2.369  | -4.573 | -1.017 |
| Eu                 | 1.695  | -4.174 | 1.877  | 1.716  | -4.251 | 1.884  |
| Si                 | 1.262  | -2.879 | -2.287 | 1.295  | -2.959 | -2.354 |
| Si                 | 0.953  | -1.379 | 1.154  | 0.963  | -1.404 | 1.191  |
| No.20              | PW91   |        |        | BLYP   |        |        |
| Si                 | -2.051 | 0.760  | -0.174 | -2.053 | 0.778  | -0.172 |
| Si                 | 1.508  | 1.334  | -1.982 | 1.512  | 1.367  | -2.017 |
| Si                 | -1.029 | 4.132  | 2.470  | -1.000 | 4.236  | 2.497  |
| Si                 | -0.707 | 2.143  | -1.499 | -0.745 | 2.180  | -1.554 |
| Si                 | -3.364 | 1.691  | 1.480  | -3.395 | 1.714  | 1.482  |
| Si                 | -0.925 | 1.753  | 1.944  | -0.973 | 1.794  | 2.101  |
| Si                 | -1.311 | 4.442  | -1.441 | -1.367 | 4.510  | -1.442 |
| Si                 | 1.241  | 1.951  | 0.279  | 1.241  | 2.026  | 0.263  |
| Si                 | 1.287  | 0.900  | 2.427  | 1.307  | 0.914  | 2.406  |
| Si                 | 0.154  | 4.026  | 0.423  | 0.163  | 4.132  | 0.406  |
| Si                 | -2.387 | 3.735  | 0.588  | -2.434 | 3.837  | 0.652  |
| Si                 | -0.987 | -1.332 | -0.141 | -1.004 | -1.348 | -0.171 |
| Si                 | 2.895  | -2.109 | -0.176 | 2.949  | -2.134 | -0.164 |
| Si                 | -1.342 | -3.479 | 0.958  | -1.367 | -3.547 | 0.913  |
| Si                 | 1.160  | -0.986 | -1.502 | 1.199  | -1.001 | -1.549 |
| Si                 | -0.009 | -4.161 | -0.816 | -0.008 | -4.291 | -0.848 |
| Si                 | -0.668 | -2.308 | -2.310 | -0.655 | -2.365 | -2.341 |
| Si                 | 2.288  | -4.599 | -0.130 | 2.320  | -4.686 | -0.097 |
| Si                 | 1.009  | -3.394 | 1.409  | 1.004  | -3.487 | 1.446  |
| Eu                 | 2.063  | -3.496 | -2.846 | 2.125  | -3.568 | -2.861 |
| Si                 | 1.172  | -1.006 | 1.037  | 1.178  | -1.062 | 1.048  |
| No.21              | PW91   |        |        | BLYP   |        |        |
| Si                 | -1.002 | 0.774  | 0.908  | -1.181 | 0.813  | 0.842  |
| Si                 | 1.703  | 1.230  | -1.864 | 1.713  | 1.267  | -1.830 |
| Si                 | -1.420 | 5.004  | 1.660  | -1.377 | 5.109  | 1.752  |
| Si                 | -0.603 | 1.687  | -1.307 | -0.611 | 1.839  | -1.305 |
| Si                 | -2.914 | 1.583  | 2.056  | -3.095 | 1.745  | 1.948  |
| Si                 | -0.981 | 2.872  | 2.562  | -1.128 | 2.912  | 2.660  |
| Si                 | -1.910 | 3.601  | -1.843 | -1.820 | 3.850  | -1.862 |
| Si                 | 1.253  | 2.199  | 0.285  | 1.252  | 2.248  | 0.349  |
| Si                 | 0.863  | 1.391  | 2.474  | 0.679  | 1.367  | 2.505  |
| Si                 | -0.182 | 4.067  | -0.158 | -0.101 | 4.211  | -0.105 |
| Si                 | -2.607 | 3.334  | 0.441  | -2.667 | 3.599  | 0.417  |
| Si                 | -0.846 | -1.510 | -0.330 | -0.817 | -1.641 | -0.291 |
| Si                 | 3.127  | -2.346 | 0.059  | 3.225  | -2.408 | -0.100 |
| Si                 | -1.025 | -3.615 | 0.812  | -0.881 | -3.760 | 0.923  |
| Si                 | 1.431  | -0.847 | -0.696 | 1.445  | -0.911 | -0.761 |
| Si                 | -0.477 | -3.914 | -1.481 | -0.497 | -4.125 | -1.406 |
| Si                 | -0.203 | -1.800 | -2.644 | -0.354 | -2.033 | -2.663 |
| Si                 | 1.530  | -5.211 | -1.586 | 1.607  | -5.320 | -1.606 |
| Si                 | 1.371  | -3.998 | 0.430  | 1.551  | -4.140 | 0.449  |
| Si                 | 2.016  | -2.891 | -2.014 | 2.014  | -2.970 | -2.141 |
| Eu                 | 0.874  | -1.611 | 2.236  | 1.040  | -1.653 | 2.224  |
| GdSi <sub>20</sub> |        |        |        |        |        |        |
| Cage               | PW91   |        |        | BLYP   |        |        |
| Si                 | 2.707  | -1.128 | -1.595 | 2.743  | -1.132 | -1.612 |
| Si                 | 2.924  | 1.040  | -0.776 | 2.987  | 1.072  | -0.802 |
| Si                 | 0.820  | -1.110 | -3.018 | 0.836  | -1.131 | -3.057 |
| Si                 | -0.012 | 1.063  | -3.055 | 0.001  | 1.070  | -3.066 |
| Si                 | 1.286  | 2.410  | -1.682 | 1.325  | 2.461  | -1.715 |
| Si                 | -0.835 | -2.468 | -2.044 | -0.842 | -2.504 | -2.071 |
| Si                 | -2.629 | -1.085 | -1.521 | -2.642 | -1.097 | -1.515 |
| Si                 | -2.140 | 1.089  | -2.145 | -2.147 | 1.097  | -2.145 |
| Si                 | 0.008  | -3.340 | -0.017 | 0.001  | -3.378 | -0.011 |
| Si                 | -1.286 | -2.410 | 1.682  | -1.324 | -2.461 | 1.715  |
| Si                 | -2.924 | -1.041 | 0.776  | -2.987 | -1.073 | 0.802  |
| Si                 | 2.173  | -2.460 | 0.271  | 2.200  | -2.499 | 0.264  |
| Si                 | 2.140  | -1.089 | 2.145  | 2.147  | -1.098 | 2.145  |
| Si                 | 0.012  | -1.064 | 3.056  | -0.000 | -1.070 | 3.066  |
| Si                 | 2.630  | 1.085  | 1.521  | 2.642  | 1.097  | 1.515  |
| Si                 | 0.836  | 2.468  | 2.045  | 0.842  | 2.504  | 2.072  |
| Si                 | -0.820 | 1.110  | 3.018  | -0.836 | 1.130  | 3.057  |
| Si                 | -2.707 | 1.128  | 1.596  | -2.743 | 1.132  | 1.612  |
| Si                 | -2.173 | 2.460  | -0.270 | -2.200 | 2.499  | -0.263 |
| Si                 | -0.008 | 3.339  | 0.018  | -0.001 | 3.378  | 0.011  |
| Gd                 | 0.000  | -0.000 | 0.000  | 0.000  | -0.000 | 0.000  |
| No.1               | PW91   |        |        | BLYP   |        |        |
| Gd                 | -2.053 | 0.790  | 0.336  | -2.050 | 0.746  | 0.226  |
| Si                 | 1.520  | 1.203  | -2.369 | 1.439  | 1.246  | -2.400 |
| Si                 | -0.422 | 4.860  | 2.318  | -0.435 | 4.842  | 2.463  |
| Si                 | -0.844 | 1.503  | -2.064 | -0.929 | 1.808  | -2.129 |
| Si                 | -3.107 | 2.138  | 2.616  | -3.250 | 2.184  | 2.433  |
| Si                 | -0.848 | 2.549  | 2.774  | -0.980 | 2.497  | 2.764  |
| Si                 | -1.205 | 3.585  | -1.029 | -1.109 | 3.854  | -1.019 |
| Si                 | 0.757  | 2.150  | -0.234 | 0.823  | 2.250  | -0.242 |
| Si                 | 0.732  | 1.057  | 1.852  | 0.706  | 1.071  | 1.835  |
| Si                 | 0.623  | 4.536  | 0.086  | 0.728  | 4.649  | 0.212  |
| Si                 | -2.236 | 3.832  | 1.172  | -2.256 | 3.987  | 1.157  |
| Si                 | -1.347 | -1.834 | -0.762 | -1.400 | -2.006 | -0.657 |
| Si                 | 2.672  | -1.843 | 0.288  | 2.726  | -1.880 | 0.233  |
| Si                 | -0.767 | -4.098 | -0.271 | -0.747 | -4.259 | -0.126 |
| Si                 | 0.998  | -0.982 | -1.414 | 0.971  | -1.035 | -1.468 |
| Si                 | 0.862  | -5.076 | -1.797 | 0.823  | -5.214 | -1.773 |
| Si                 | -0.142 | -2.857 | -2.570 | -0.224 | -2.983 | -2.534 |
| Si                 | 1.830  | -4.153 | 0.249  | 1.948  | -4.254 | 0.221  |
| Si                 | 0.208  | -3.337 | 1.764  | 0.397  | -3.393 | 1.836  |
| Si                 | 2.392  | -2.920 | -1.919 | 2.409  | -2.971 | -2.005 |
| Si                 | 0.370  | -1.104 | 0.975  | 0.406  | -1.141 | 0.972  |
| No.2               | PW91   |        |        | BLYP   |        |        |
| Si                 | -1.852 | 0.881  | -0.030 | -1.820 | 0.895  | 0.025  |

Part III: xyz Coordinates for Stationary Points

|      |        |        |        |        |        |        |
|------|--------|--------|--------|--------|--------|--------|
| Gd   | 0.505  | 1.872  | -1.726 | 0.572  | 1.894  | -1.706 |
| Si   | -1.106 | 3.809  | 2.500  | -1.204 | 3.904  | 2.507  |
| Si   | -2.198 | 2.481  | -1.811 | -2.163 | 2.476  | -1.822 |
| Si   | -3.981 | 2.074  | -0.253 | -4.009 | 2.051  | -0.317 |
| Si   | -0.388 | 1.678  | 1.629  | -0.378 | 1.751  | 1.709  |
| Si   | -0.923 | 4.570  | -1.160 | -0.957 | 4.635  | -1.158 |
| Si   | 1.925  | 2.001  | 0.628  | 1.987  | 2.205  | 0.679  |
| Si   | 1.554  | 0.605  | 2.596  | 1.628  | 0.668  | 2.600  |
| Si   | 0.487  | 3.859  | 0.718  | 0.473  | 3.993  | 0.785  |
| Si   | -2.387 | 3.702  | 0.465  | -2.523 | 3.812  | 0.431  |
| Si   | -0.935 | -1.266 | -0.291 | -0.895 | -1.275 | -0.248 |
| Si   | 3.023  | -2.205 | -0.321 | 3.058  | -2.286 | -0.377 |
| Si   | -0.766 | -3.008 | 1.387  | -0.820 | -3.126 | 1.359  |
| Si   | 1.239  | -0.996 | -1.537 | 1.258  | -1.060 | -1.595 |
| Si   | -0.049 | -4.456 | -0.414 | -0.059 | -4.581 | -0.439 |
| Si   | -0.813 | -2.852 | -2.065 | -0.880 | -2.901 | -2.042 |
| Si   | 2.372  | -4.825 | -0.491 | 2.384  | -4.915 | -0.510 |
| Si   | 1.568  | -3.497 | 1.429  | 1.565  | -3.584 | 1.466  |
| Si   | 1.525  | -3.277 | -2.216 | 1.493  | -3.365 | -2.321 |
| Si   | 1.202  | -1.150 | 0.961  | 1.291  | -1.192 | 0.973  |
| No.3 | PW91   |        |        | BLYP   |        |        |
| Si   | -2.429 | 0.581  | -0.306 | -2.434 | 0.579  | -0.282 |
| Si   | 1.119  | 1.267  | -2.535 | 1.135  | 1.304  | -2.517 |
| Gd   | -0.474 | 3.244  | 3.098  | -0.478 | 3.396  | 3.161  |
| Si   | -0.923 | 2.082  | -1.491 | -0.981 | 2.101  | -1.559 |
| Si   | -2.802 | 1.669  | 1.972  | -2.876 | 1.814  | 1.974  |
| Si   | -0.638 | 1.481  | 0.986  | -0.686 | 1.545  | 1.039  |
| Si   | -1.464 | 4.427  | -1.247 | -1.475 | 4.493  | -1.262 |
| Si   | 1.459  | 2.089  | -0.325 | 1.438  | 2.177  | -0.282 |
| Si   | 1.478  | 1.073  | 1.876  | 1.445  | 1.064  | 1.904  |
| Si   | 0.284  | 4.034  | 0.430  | 0.304  | 4.185  | 0.455  |
| Si   | -2.153 | 3.764  | 0.946  | -2.228 | 3.939  | 0.979  |
| Si   | -0.968 | -1.333 | -0.204 | -0.975 | -1.399 | -0.205 |
| Si   | 3.184  | -1.725 | -0.438 | 3.242  | -1.804 | -0.476 |
| Si   | -1.774 | -3.670 | -0.358 | -1.770 | -3.769 | -0.374 |
| Si   | 1.024  | -0.893 | -1.505 | 1.041  | -0.941 | -1.539 |
| Si   | 0.483  | -4.535 | -0.417 | 0.508  | -4.669 | -0.444 |
| Si   | -0.382 | -2.734 | -2.277 | -0.375 | -2.809 | -2.346 |
| Si   | 2.100  | -3.455 | 1.017  | 2.163  | -3.573 | 1.006  |
| Si   | -0.248 | -2.955 | 1.670  | -0.208 | -3.055 | 1.709  |
| Si   | 1.957  | -3.303 | -1.870 | 1.997  | -3.406 | -1.929 |
| Si   | 1.169  | -1.110 | 0.975  | 1.211  | -1.172 | 0.986  |
| No.4 | PW91   |        |        | BLYP   |        |        |
| Si   | -2.489 | 0.316  | 1.681  | -2.522 | 0.332  | 1.744  |
| Si   | 2.292  | 1.595  | -2.061 | 2.370  | 1.567  | -2.070 |
| Si   | -1.044 | 3.765  | 1.645  | -1.052 | 3.863  | 1.680  |
| Gd   | -0.586 | 1.172  | -0.501 | -0.610 | 1.186  | -0.548 |
| Si   | -3.738 | 1.331  | -0.065 | -3.808 | 1.389  | 0.008  |
| Si   | -0.753 | 1.632  | 2.468  | -0.766 | 1.696  | 2.478  |
| Si   | -1.202 | 3.858  | -1.353 | -1.268 | 3.940  | -1.374 |
| Si   | 2.048  | 2.402  | 0.095  | 2.064  | 2.456  | 0.069  |
| Si   | 1.428  | 1.074  | 1.943  | 1.423  | 1.108  | 1.947  |
| Si   | 0.611  | 4.276  | 0.094  | 0.600  | 4.347  | 0.064  |
| Si   | -2.874 | 3.498  | 0.198  | -2.914 | 3.590  | 0.233  |
| Si   | -1.254 | -1.429 | 0.674  | -1.281 | -1.432 | 0.736  |
| Si   | 2.908  | -2.292 | -0.168 | 2.965  | -2.303 | -0.061 |
| Si   | -1.373 | -3.766 | 1.066  | -1.397 | -3.805 | 1.014  |
| Si   | 1.636  | -0.577 | -1.368 | 1.684  | -0.633 | -1.369 |
| Si   | -0.346 | -3.769 | -1.043 | -0.323 | -3.908 | -1.111 |
| Si   | -0.739 | -1.459 | -1.956 | -0.727 | -1.504 | -2.008 |
| Si   | 1.978  | -4.478 | -0.993 | 2.047  | -4.534 | -1.025 |
| Si   | 1.066  | -3.500 | 1.188  | 1.082  | -3.642 | 1.183  |
| Si   | 1.316  | -2.643 | -2.555 | 1.316  | -2.678 | -2.643 |
| Si   | 1.113  | -1.009 | 1.008  | 1.115  | -1.036 | 1.051  |
| No.5 | PW91   |        |        | BLYP   |        |        |
| Si   | -2.469 | 0.552  | -0.369 | -2.386 | 0.589  | -0.334 |
| Si   | 1.441  | 1.417  | -1.899 | 1.473  | 1.438  | -1.902 |
| Si   | -1.105 | 3.789  | 1.708  | -1.166 | 3.912  | 1.742  |
| Si   | -0.791 | 1.851  | -1.355 | -0.793 | 1.936  | -1.447 |
| Gd   | -3.530 | 2.327  | 1.627  | -3.610 | 2.343  | 1.593  |
| Si   | -1.044 | 1.208  | 1.559  | -1.077 | 1.260  | 1.747  |
| Si   | -0.896 | 4.165  | -0.738 | -0.974 | 4.262  | -0.749 |
| Si   | 1.214  | 2.097  | 0.407  | 1.275  | 2.161  | 0.411  |
| Si   | 1.103  | 0.698  | 2.362  | 1.154  | 0.730  | 2.367  |
| Si   | 0.977  | 4.491  | 0.750  | 0.929  | 4.571  | 0.729  |
| Si   | -2.895 | 4.651  | 0.295  | -2.972 | 4.770  | 0.326  |
| Si   | -1.122 | -1.346 | -0.416 | -1.090 | -1.377 | -0.420 |
| Si   | 2.928  | -2.063 | -0.154 | 2.988  | -2.137 | -0.161 |
| Si   | -0.931 | -3.240 | 1.070  | -0.975 | -3.336 | 1.041  |
| Si   | 1.115  | -0.874 | -1.363 | 1.176  | -0.910 | -1.386 |
| Si   | 0.103  | -4.477 | -0.737 | 0.097  | -4.595 | -0.766 |
| Si   | -0.685 | -2.810 | -2.273 | -0.717 | -2.889 | -2.294 |
| Si   | 2.548  | -4.600 | -0.601 | 2.563  | -4.699 | -0.614 |
| Si   | 1.430  | -3.577 | 1.399  | 1.423  | -3.662 | 1.442  |
| Si   | 1.702  | -3.003 | -2.302 | 1.718  | -3.069 | -2.378 |
| Si   | 0.905  | -1.264 | 1.031  | 0.962  | -1.302 | 1.054  |
| No.6 | PW91   |        |        | BLYP   |        |        |
| Si   | -2.411 | 0.724  | -0.468 | -2.413 | 0.736  | -0.480 |
| Si   | 1.514  | 1.378  | -2.143 | 1.519  | 1.414  | -2.153 |
| Si   | -1.156 | 4.242  | 2.299  | -1.122 | 4.340  | 2.350  |
| Si   | -0.616 | 2.058  | -1.194 | -0.666 | 2.129  | -1.287 |
| Si   | -3.691 | 1.705  | 1.180  | -3.703 | 1.717  | 1.195  |
| Gd   | -0.877 | 1.330  | 2.119  | -0.895 | 1.380  | 2.175  |
| Si   | -1.138 | 4.418  | -1.397 | -1.205 | 4.501  | -1.382 |
| Si   | 1.592  | 1.947  | 0.214  | 1.609  | 2.042  | 0.221  |
| Si   | 1.949  | 0.881  | 2.261  | 1.948  | 0.894  | 2.257  |
| Si   | 0.273  | 3.830  | 0.503  | 0.276  | 3.942  | 0.502  |
| Si   | -2.442 | 3.533  | 0.451  | -2.504 | 3.651  | 0.550  |
| Si   | -1.051 | -1.115 | 0.009  | -1.067 | -1.149 | -0.021 |
| Si   | 2.824  | -2.175 | -0.311 | 2.874  | -2.243 | -0.326 |
| Si   | -1.272 | -3.344 | 0.873  | -1.301 | -3.421 | 0.820  |
| Si   | 0.996  | -0.839 | -1.406 | 1.024  | -0.877 | -1.457 |
| Si   | 0.093  | -4.235 | -0.791 | 0.128  | -4.359 | -0.816 |
| Si   | -0.831 | -2.386 | -2.167 | -0.827 | -2.475 | -2.213 |
| Si   | 2.380  | -4.623 | -0.163 | 2.414  | -4.722 | -0.056 |
| Si   | 1.064  | -3.357 | 1.451  | 1.038  | -3.422 | 1.503  |
| Si   | 1.586  | -2.978 | -2.423 | 1.629  | -3.037 | -2.489 |
| Si   | 1.213  | -0.994 | 1.099  | 1.243  | -1.041 | 1.103  |
| No.7 | PW91   |        |        | BLYP   |        |        |
| Si   | -2.070 | 0.869  | -0.322 | -2.023 | 0.879  | -0.333 |
| Si   | 1.619  | 1.369  | -2.000 | 1.654  | 1.398  | -2.038 |
| Si   | -0.981 | 3.939  | 2.485  | -0.938 | 4.058  | 2.523  |
| Si   | -0.619 | 2.273  | -1.516 | -0.632 | 2.307  | -1.594 |
| Si   | -3.349 | 1.748  | 1.413  | -3.366 | 1.729  | 1.386  |
| Si   | -0.945 | 1.592  | 1.901  | -1.012 | 1.651  | 2.097  |
| Gd   | -1.397 | 4.960  | -1.706 | -1.503 | 5.024  | -1.693 |
| Si   | 1.239  | 1.910  | 0.283  | 1.236  | 2.010  | 0.254  |
| Si   | 1.190  | 0.689  | 2.374  | 1.194  | 0.745  | 2.353  |
| Si   | 0.180  | 4.007  | 0.379  | 0.190  | 4.140  | 0.366  |
| Si   | -2.434 | 3.850  | 0.622  | -2.491 | 3.934  | 0.728  |
| Si   | -1.066 | -1.257 | -0.333 | -1.030 | -1.282 | -0.382 |
| Si   | 2.914  | -2.140 | -0.181 | 2.965  | -2.202 | -0.157 |
| Si   | -0.948 | -3.137 | 1.195  | -1.014 | -3.205 | 1.143  |
| Si   | 1.137  | -0.874 | -1.355 | 1.218  | -0.909 | -1.390 |
| Si   | -0.033 | -4.416 | -0.650 | -0.037 | -4.537 | -0.672 |
| Si   | -0.791 | -2.750 | -2.191 | -0.808 | -2.848 | -2.230 |
| Si   | 2.391  | -4.699 | -0.623 | 2.413  | -4.784 | -0.602 |
| Si   | 1.418  | -3.604 | 1.430  | 1.382  | -3.675 | 1.493  |
| Si   | 1.585  | -3.046 | -2.273 | 1.619  | -3.118 | -2.337 |
| Si   | 0.953  | -1.281 | 1.065  | 0.978  | -1.313 | 1.084  |
| No.8 | PW91   |        |        | BLYP   |        |        |
| Si   | -2.013 | 0.922  | 0.153  | -2.015 | 0.927  | 0.137  |
| Si   | 0.989  | 1.714  | -2.406 | 0.982  | 1.721  | -2.466 |
| Si   | 0.106  | 3.786  | 1.818  | 0.031  | 3.841  | 1.874  |

Part III: xyz Coordinates for Stationary Points

|       |        |        |        |        |        |        |
|-------|--------|--------|--------|--------|--------|--------|
| Si    | -1.256 | 2.079  | -1.748 | -1.265 | 2.129  | -1.777 |
| Si    | -3.262 | 2.233  | 1.711  | -3.260 | 2.265  | 1.718  |
| Si    | -1.018 | 1.624  | 2.339  | -1.022 | 1.602  | 2.394  |
| Si    | -1.518 | 4.476  | -1.758 | -1.535 | 4.562  | -1.795 |
| Gd    | 1.272  | 1.118  | 0.662  | 1.291  | 1.155  | 0.658  |
| Si    | 0.505  | 0.204  | 3.376  | 0.536  | 0.182  | 3.425  |
| Si    | 0.457  | 3.576  | -0.667 | 0.465  | 3.677  | -0.659 |
| Si    | -1.816 | 3.821  | 0.484  | -1.869 | 3.983  | 0.492  |
| Si    | -0.893 | -1.102 | -0.042 | -0.918 | -1.139 | -0.050 |
| Si    | 2.372  | -1.549 | 0.156  | 2.449  | -1.550 | 0.178  |
| Si    | -1.174 | -3.516 | 0.342  | -1.201 | -3.594 | 0.353  |
| Si    | 0.903  | -0.606 | -1.630 | 0.933  | -0.643 | -1.644 |
| Si    | 0.573  | -4.478 | -1.136 | 0.560  | -4.562 | -1.158 |
| Si    | -0.772 | -2.578 | -2.060 | -0.797 | -2.642 | -2.094 |
| Si    | 2.995  | -3.769 | -0.392 | 3.030  | -3.800 | -0.377 |
| Si    | 1.192  | -3.749 | 1.291  | 1.208  | -3.823 | 1.342  |
| Si    | 1.859  | -2.636 | -2.354 | 1.878  | -2.700 | -2.423 |
| Si    | 0.494  | -1.567 | 1.860  | 0.515  | -1.592 | 1.872  |
| No.9  | PW91   |        |        | BLYP   |        |        |
| Si    | -2.089 | 0.877  | -0.526 | -2.187 | 0.872  | -0.469 |
| Si    | 1.177  | 1.271  | -2.508 | 1.549  | 1.389  | -1.854 |
| Si    | -0.195 | 3.271  | 2.704  | -0.544 | 3.836  | 2.110  |
| Si    | -1.126 | 2.241  | -2.210 | -1.119 | 2.303  | -2.175 |
| Si    | -3.316 | 1.449  | 1.415  | -3.463 | 1.376  | 1.502  |
| Si    | -0.994 | 1.162  | 1.731  | -1.052 | 1.405  | 1.920  |
| Si    | -0.798 | 4.163  | -0.636 | -1.060 | 4.463  | -0.671 |
| Si    | 0.346  | 1.930  | -0.378 | 0.088  | 2.293  | -0.163 |
| Gd    | 1.842  | 1.325  | 1.901  | 2.065  | 1.163  | 1.262  |
| Si    | 1.214  | 3.868  | 0.733  | 1.234  | 4.368  | 0.578  |
| Si    | -2.121 | 3.531  | 1.333  | -2.663 | 3.712  | 1.191  |
| Si    | -1.405 | -1.479 | -0.595 | -1.283 | -1.377 | -0.544 |
| Si    | 2.593  | -1.329 | 0.378  | 2.708  | -1.854 | 0.351  |
| Si    | -0.977 | -3.149 | 1.293  | -1.156 | -3.301 | 1.042  |
| Si    | 0.849  | -0.730 | -1.248 | 1.036  | -0.820 | -1.162 |
| Si    | 0.021  | -4.161 | -0.707 | 0.105  | -4.449 | -0.779 |
| Si    | -0.291 | -2.598 | -2.489 | -0.476 | -2.759 | -2.407 |
| Si    | 2.188  | -5.053 | -0.532 | 2.478  | -4.749 | -0.496 |
| Si    | 1.567  | 3.377  | 1.146  | 1.323  | -3.648 | 1.499  |
| Si    | 2.082  | -2.861 | -1.638 | 1.934  | -2.893 | -2.082 |
| Si    | 0.274  | -1.097 | 1.248  | 0.481  | -1.330 | 1.347  |
| No.10 | PW91   |        |        | BLYP   |        |        |
| Si    | -2.282 | 0.871  | -0.339 | -2.267 | 0.880  | -0.377 |
| Si    | 1.305  | 1.202  | -2.607 | 1.346  | 1.263  | -2.629 |
| Si    | -2.106 | 3.207  | 2.847  | -2.114 | 3.238  | 2.929  |
| Si    | -0.774 | 2.020  | -1.784 | -0.758 | 2.079  | -1.819 |
| Si    | -3.831 | 2.343  | 0.992  | -3.874 | 2.374  | 0.909  |
| Si    | -1.136 | 1.395  | 1.674  | -1.188 | 1.425  | 1.700  |
| Si    | -0.145 | 4.214  | -1.029 | -0.222 | 4.292  | -1.035 |
| Si    | 1.355  | 2.295  | -0.467 | 1.425  | 2.413  | -0.473 |
| Si    | 1.290  | 1.143  | 1.725  | 1.272  | 1.159  | 1.732  |
| Gd    | 0.553  | 3.778  | 1.898  | 0.567  | 3.825  | 1.923  |
| Si    | -1.893 | 3.619  | 0.511  | -1.994 | 3.827  | 0.603  |
| Si    | -1.190 | -1.206 | -0.391 | -1.163 | -1.227 | -0.433 |
| Si    | 2.923  | -1.941 | -0.368 | 2.972  | -1.997 | -0.394 |
| Si    | -0.821 | -2.821 | 1.394  | -0.843 | -2.881 | 1.377  |
| Si    | 0.990  | -0.957 | -1.603 | 1.049  | -0.968 | -1.642 |
| Si    | 0.042  | -4.344 | -0.274 | 0.067  | -4.489 | -0.232 |
| Si    | -0.846 | -2.946 | -2.007 | -0.928 | -3.105 | -1.944 |
| Si    | 2.474  | -4.533 | -0.342 | 2.517  | -4.605 | -0.384 |
| Si    | 1.571  | -3.157 | 1.563  | 1.596  | -3.222 | 1.633  |
| Si    | 1.540  | -3.212 | -2.210 | 1.500  | -3.277 | -2.271 |
| Si    | 0.981  | -0.971 | 0.820  | 1.039  | -1.006 | 0.828  |
| No.11 | PW91   |        |        | BLYP   |        |        |
| Si    | -2.558 | 0.487  | -0.307 | -2.488 | 0.527  | -0.332 |
| Si    | 1.369  | 1.507  | -1.829 | 1.412  | 1.541  | -1.857 |
| Si    | -0.795 | 3.871  | 1.479  | -0.865 | 3.999  | 1.573  |
| Si    | -0.856 | 1.931  | -1.205 | -0.859 | 2.036  | -1.364 |
| Si    | -2.498 | 3.016  | 2.733  | -2.589 | 3.085  | 2.771  |
| Si    | -1.309 | 1.266  | 1.606  | -1.380 | 1.282  | 1.714  |
| Si    | -0.900 | 4.385  | -0.906 | -0.929 | 4.494  | -0.841 |
| Si    | 1.144  | 2.104  | 0.514  | 1.231  | 2.208  | 0.491  |
| Si    | 0.873  | 0.684  | 2.419  | 0.878  | 0.733  | 2.382  |
| Si    | 1.204  | 4.529  | 0.487  | 1.192  | 4.644  | 0.599  |
| Gd    | -3.234 | 3.203  | -0.070 | -3.277 | 3.208  | -0.112 |
| Si    | -1.147 | -1.356 | -0.494 | -1.112 | -1.377 | -0.545 |
| Si    | 2.866  | -2.019 | -0.112 | 2.915  | -2.092 | -0.134 |
| Si    | -1.053 | -3.293 | 0.924  | -1.069 | -3.329 | 0.934  |
| Si    | 1.084  | -0.835 | -1.376 | 1.157  | -0.854 | -1.404 |
| Si    | 0.062  | -4.435 | -0.887 | 0.071  | -4.573 | -0.850 |
| Si    | -0.618 | -2.688 | -2.421 | -0.720 | -2.888 | -2.403 |
| Si    | 2.506  | -4.578 | -0.597 | 2.541  | -4.656 | -0.654 |
| Si    | 1.290  | -3.582 | 1.326  | 1.321  | -3.671 | 1.391  |
| Si    | 1.760  | -2.945 | -2.312 | 1.717  | -3.014 | -2.394 |
| Si    | 0.810  | -1.249 | 1.024  | 0.852  | -1.300 | 1.034  |
| No.12 | PW91   |        |        | BLYP   |        |        |
| Si    | -1.901 | 0.629  | 0.300  | -1.870 | 0.666  | 0.308  |
| Si    | 1.133  | 1.238  | -2.518 | 1.265  | 1.252  | -2.445 |
| Si    | -0.868 | 4.044  | 1.744  | -0.957 | 4.163  | 1.767  |
| Si    | -0.705 | 2.002  | -1.181 | -0.721 | 2.051  | -1.257 |
| Si    | -2.461 | 1.950  | 2.247  | -2.687 | 2.031  | 2.147  |
| Si    | -0.162 | 1.522  | 1.837  | -0.369 | 1.639  | 2.183  |
| Si    | -1.522 | 4.261  | -0.881 | -1.533 | 4.333  | -0.985 |
| Si    | 1.672  | 1.872  | -0.292 | 1.619  | 1.973  | -0.166 |
| Si    | 2.041  | 0.599  | 1.757  | 1.846  | 0.716  | 1.970  |
| Si    | 0.640  | 4.006  | -0.049 | 0.603  | 4.114  | -0.025 |
| Si    | -3.060 | 4.173  | 1.106  | -3.138 | 4.338  | 0.984  |
| Gd    | -1.868 | -1.973 | -0.964 | -1.877 | -1.989 | -0.835 |
| Si    | 2.790  | -1.383 | 0.068  | 3.276  | -1.831 | -0.297 |
| Si    | -1.698 | -4.447 | 0.493  | -1.650 | -4.446 | 0.673  |
| Si    | 0.800  | -0.924 | -1.559 | 0.946  | -0.959 | -1.485 |
| Si    | 0.353  | -4.212 | -0.651 | 0.285  | -4.355 | -0.705 |
| Si    | 0.186  | -2.937 | -2.755 | 0.061  | -2.897 | -2.809 |
| Si    | 2.189  | -3.669 | 0.833  | 2.262  | -3.935 | 0.666  |
| Si    | -0.065 | -3.052 | 1.470  | 0.122  | -3.096 | 1.486  |
| Si    | 2.363  | -2.880 | -1.779 | 2.287  | -2.987 | -2.032 |
| Si    | 0.140  | -0.822 | 0.770  | 0.226  | -0.785 | 0.856  |
| No.13 | PW91   |        |        | BLYP   |        |        |
| Si    | -2.041 | 0.786  | -0.001 | -2.163 | 0.920  | -0.110 |
| Si    | 1.327  | 0.936  | -2.121 | 1.238  | 0.932  | -2.233 |
| Si    | -0.494 | 4.255  | 2.488  | -0.486 | 4.232  | 2.552  |
| Si    | -0.732 | 2.067  | -1.489 | -0.818 | 2.189  | -1.603 |
| Si    | -3.178 | 1.958  | 1.631  | -3.264 | 2.056  | 1.599  |
| Si    | -0.823 | 1.898  | 2.159  | -0.897 | 1.855  | 2.217  |
| Si    | -1.080 | 4.434  | -1.385 | -1.028 | 4.592  | -1.329 |
| Si    | 1.062  | 1.685  | 0.190  | 0.902  | 1.641  | 0.145  |
| Si    | 1.054  | 0.370  | 2.275  | 1.036  | 0.304  | 2.252  |
| Si    | 0.489  | 3.929  | 0.351  | 0.537  | 3.948  | 0.399  |
| Si    | -2.087 | 3.945  | 0.750  | -2.129 | 4.108  | 0.800  |
| Si    | -1.817 | -1.515 | -0.490 | -1.573 | -1.352 | -0.389 |
| Gd    | 2.768  | -0.595 | 0.064  | 2.808  | -0.489 | -0.030 |
| Si    | -1.065 | -3.398 | 1.136  | -1.570 | -3.323 | 0.972  |
| Si    | 0.306  | -1.162 | -1.645 | 0.226  | -1.226 | -1.883 |
| Si    | 0.036  | -4.214 | -0.865 | 0.014  | -4.225 | -0.730 |
| Si    | 0.232  | -3.114 | -2.997 | 0.299  | -3.331 | -2.988 |
| Si    | 2.172  | -4.993 | -0.345 | 2.157  | -5.097 | -0.329 |
| Si    | 1.592  | -3.135 | 1.029  | 2.220  | -3.121 | 0.997  |
| Si    | 2.184  | -2.865 | -1.628 | 2.247  | -2.865 | -1.606 |
| Si    | 0.096  | -1.268 | 0.894  | 0.244  | -1.745 | 1.298  |
| No.14 | PW91   |        |        | BLYP   |        |        |
| Si    | -1.575 | 0.662  | -0.704 | -1.663 | 0.668  | -0.783 |
| Si    | 1.897  | 1.865  | -2.090 | 1.898  | 1.877  | -2.136 |
| Si    | -1.285 | 3.496  | 2.725  | -1.283 | 3.572  | 2.777  |
| Si    | -0.419 | 2.423  | -1.665 | -0.451 | 2.456  | -1.690 |
| Si    | -3.181 | 0.950  | 0.926  | -3.201 | 0.982  | 0.940  |

Part III: xyz Coordinates for Stationary Points

|       |        |        |        |        |        |        |
|-------|--------|--------|--------|--------|--------|--------|
| Si    | -0.881 | 1.304  | 1.861  | -0.885 | 1.322  | 2.011  |
| Si    | -1.412 | 4.501  | -1.069 | -1.435 | 4.572  | -1.058 |
| Si    | 1.238  | 1.805  | 0.251  | 1.309  | 1.914  | 0.259  |
| Si    | 1.378  | 0.539  | 2.283  | 1.428  | 0.572  | 2.257  |
| Si    | 0.004  | 3.761  | 0.729  | 0.021  | 3.857  | 0.754  |
| Si    | -2.510 | 3.274  | 0.696  | -2.548 | 3.348  | 0.755  |
| Si    | -0.026 | -1.120 | -0.764 | -0.132 | -1.147 | -0.835 |
| Si    | 2.728  | -2.087 | -0.673 | 2.835  | -2.148 | -0.644 |
| Gd    | -1.624 | -1.764 | 1.320  | -1.691 | -1.816 | 1.294  |
| Si    | 1.752  | -0.568 | -2.236 | 1.774  | -0.611 | -2.176 |
| Si    | 0.476  | -3.902 | 0.122  | 0.502  | -4.038 | 0.159  |
| Si    | -1.320 | -3.120 | -1.331 | -1.283 | -3.257 | -1.381 |
| Si    | 2.226  | -4.248 | -1.480 | 2.255  | -4.309 | -1.477 |
| Si    | 0.439  | -3.444 | 2.411  | 0.410  | -3.431 | 2.432  |
| Si    | 0.726  | -2.701 | -2.587 | 0.769  | -2.758 | -2.702 |
| Si    | 1.369  | -1.629 | 1.275  | 1.369  | -1.627 | 1.245  |
| No.15 | PW91   |        |        | BLYP   |        |        |
| Si    | -1.739 | 0.339  | 0.582  | -1.736 | 0.354  | 0.530  |
| Si    | 1.900  | 1.426  | -1.638 | 1.877  | 1.439  | -1.657 |
| Si    | -1.661 | 3.873  | 2.337  | -1.628 | 3.868  | 2.384  |
| Si    | -0.314 | 2.327  | -1.437 | -0.338 | 2.356  | -1.411 |
| Si    | -2.706 | 1.448  | -1.229 | -2.753 | 1.529  | -1.209 |
| Si    | -0.625 | 1.749  | 2.050  | -0.628 | 1.737  | 2.032  |
| Si    | -0.776 | 4.632  | -1.414 | -0.762 | 4.671  | -1.368 |
| Si    | 1.461  | 2.122  | 0.587  | 1.467  | 2.120  | 0.587  |
| Si    | 1.622  | 1.058  | 2.717  | 1.613  | 1.045  | 2.720  |
| Si    | 0.127  | 4.060  | 0.723  | 0.147  | 4.064  | 0.755  |
| Si    | -2.293 | 3.476  | 0.033  | -2.287 | 3.525  | 0.081  |
| Si    | -0.529 | -1.601 | 0.511  | -0.539 | -1.597 | 0.450  |
| Si    | 1.798  | -0.791 | -0.797 | 1.762  | -0.788 | -0.819 |
| Si    | -0.642 | -3.879 | 1.125  | -0.644 | -3.874 | 1.137  |
| Gd    | -0.637 | -0.486 | -2.278 | -0.702 | -0.514 | -2.505 |
| Si    | -0.587 | -5.439 | -0.722 | -0.544 | -5.491 | -0.663 |
| Si    | -0.697 | -3.143 | -1.471 | -0.655 | -3.225 | -1.475 |
| Si    | 1.482  | -4.202 | -0.565 | 1.513  | -4.230 | -0.507 |
| Si    | 1.653  | -3.392 | 1.675  | 1.645  | -3.369 | 1.710  |
| Si    | 1.598  | -2.563 | -2.325 | 1.653  | -2.618 | -2.294 |
| Si    | 1.563  | -1.016 | 1.535  | 1.537  | -1.005 | 1.520  |
| No.16 | PW91   |        |        | BLYP   |        |        |
| Si    | -2.019 | 0.534  | -0.197 | -2.003 | 0.524  | -0.216 |
| Si    | 1.587  | 1.480  | -2.156 | 1.593  | 1.498  | -2.154 |
| Si    | -1.302 | 3.670  | 1.802  | -1.311 | 3.643  | 1.819  |
| Si    | -0.548 | 2.058  | -1.212 | -0.548 | 2.071  | -1.220 |
| Si    | -2.911 | 1.632  | 1.807  | -2.915 | 1.598  | 1.789  |
| Si    | -0.566 | 1.265  | 1.622  | -0.567 | 1.241  | 1.622  |
| Si    | -1.510 | 4.233  | -0.944 | -1.517 | 4.240  | -0.923 |
| Si    | 1.639  | 1.947  | 0.161  | 1.630  | 1.948  | 0.162  |
| Si    | 1.676  | 0.846  | 2.278  | 1.680  | 0.827  | 2.268  |
| Si    | 0.458  | 4.006  | 0.300  | 0.448  | 4.003  | 0.322  |
| Si    | -3.369 | 3.906  | 0.786  | -3.374 | 3.887  | 0.802  |
| Si    | -0.770 | -1.500 | -0.163 | -0.744 | -1.502 | -0.202 |
| Si    | 3.319  | -1.994 | -0.509 | 3.342  | -1.965 | -0.551 |
| Si    | -1.861 | -3.239 | 1.135  | -1.927 | -3.123 | 1.230  |
| Si    | 1.271  | -0.786 | -1.572 | 1.309  | -0.779 | -1.595 |
| Gd    | -0.495 | -4.531 | -0.985 | -0.580 | -4.624 | -0.975 |
| Si    | -0.394 | -2.150 | -2.530 | -0.356 | -2.143 | -2.563 |
| Si    | 2.083  | -4.052 | 0.086  | 2.097  | -4.004 | 0.119  |
| Si    | 0.400  | -3.018 | 1.512  | 0.371  | -2.987 | 1.513  |
| Si    | 1.769  | -3.237 | -2.112 | 1.803  | -3.268 | -2.116 |
| Si    | 1.539  | -1.070 | 0.890  | 1.565  | -1.085 | 0.868  |
| No.17 | PW91   |        |        | BLYP   |        |        |
| Si    | -1.951 | 0.705  | 0.134  | -1.956 | 0.721  | 0.136  |
| Si    | 1.110  | 1.433  | -2.422 | 1.133  | 1.438  | -2.432 |
| Si    | -0.649 | 4.241  | 2.405  | -0.642 | 4.358  | 2.421  |
| Si    | -1.028 | 2.109  | -1.485 | -1.056 | 2.131  | -1.524 |
| Si    | -2.919 | 1.567  | 2.043  | -2.960 | 1.603  | 2.043  |
| Si    | -0.467 | 1.843  | 1.962  | -0.488 | 1.905  | 2.123  |
| Si    | -1.828 | 4.342  | -1.345 | -1.871 | 4.401  | -1.351 |
| Si    | 1.226  | 2.099  | -0.146 | 1.238  | 2.185  | -0.147 |
| Si    | 1.816  | 1.122  | 1.961  | 1.815  | 1.145  | 1.963  |
| Si    | 0.045  | 4.113  | 0.141  | 0.042  | 4.220  | 0.126  |
| Si    | -2.354 | 3.651  | 0.898  | -2.398 | 3.759  | 0.948  |
| Si    | -0.809 | -1.339 | -0.035 | -0.831 | -1.364 | -0.059 |
| Si    | 2.727  | -3.004 | 0.932  | 2.822  | -3.031 | 0.878  |
| Si    | -1.426 | -3.601 | 0.232  | -1.433 | -3.667 | 0.187  |
| Si    | 0.949  | -0.800 | -1.581 | 0.977  | -0.844 | -1.598 |
| Si    | 1.426  | -4.762 | -2.349 | 1.421  | -4.857 | -2.362 |
| Gd    | -0.748 | -2.960 | -2.466 | -0.750 | -3.017 | -2.518 |
| Si    | 0.893  | -4.219 | -0.156 | 0.966  | -4.339 | -0.117 |
| Si    | 0.186  | -2.836 | 1.933  | 0.120  | -2.920 | 1.958  |
| Si    | 2.356  | -2.756 | -1.487 | 2.409  | -2.838 | -1.542 |
| Si    | 1.442  | -0.949 | 0.832  | 1.441  | -0.990 | 0.868  |
| No.18 | PW91   |        |        | BLYP   |        |        |
| Si    | -2.046 | 0.840  | -0.248 | -2.030 | 0.843  | -0.244 |
| Si    | 1.543  | 1.382  | -2.061 | 1.558  | 1.410  | -2.085 |
| Si    | -0.961 | 4.163  | 2.451  | -0.953 | 4.275  | 2.471  |
| Si    | -0.674 | 2.205  | -1.537 | -0.708 | 2.239  | -1.591 |
| Si    | -3.348 | 1.739  | 1.438  | -3.364 | 1.743  | 1.444  |
| Si    | -0.945 | 1.788  | 1.938  | -0.985 | 1.846  | 2.111  |
| Si    | -1.262 | 4.507  | -1.457 | -1.333 | 4.569  | -1.467 |
| Si    | 1.224  | 1.912  | 0.237  | 1.233  | 2.005  | 0.228  |
| Si    | 1.230  | 0.866  | 2.395  | 1.258  | 0.911  | 2.389  |
| Si    | 0.200  | 4.026  | 0.386  | 0.194  | 4.138  | 0.365  |
| Si    | -2.343 | 3.802  | 0.581  | -2.402 | 3.889  | 0.635  |
| Si    | -1.059 | -1.283 | -0.224 | -1.024 | -1.303 | -0.241 |
| Si    | 2.762  | -2.108 | -0.094 | 2.811  | -2.166 | -0.078 |
| Si    | -1.200 | -3.383 | 0.922  | -1.252 | -3.463 | 0.856  |
| Si    | 1.080  | -0.848 | -1.378 | 1.147  | -0.882 | -1.415 |
| Si    | 0.033  | -4.400 | -0.853 | 0.025  | -4.511 | -0.901 |
| Si    | -0.759 | -2.562 | -2.281 | -0.770 | -2.634 | -2.319 |
| Gd    | 2.762  | -4.931 | -0.503 | 2.780  | -5.023 | -0.476 |
| Si    | 1.170  | -3.546 | 1.378  | 1.140  | -3.619 | 1.426  |
| Si    | 1.652  | -3.005 | -2.259 | 1.694  | -3.065 | -2.315 |
| Si    | 0.938  | -1.165 | 1.171  | 0.978  | -1.204 | 1.208  |
| No.19 | PW91   |        |        | BLYP   |        |        |
| Si    | -2.060 | 0.820  | -0.374 | -2.053 | 0.823  | -0.382 |
| Si    | 1.631  | 1.432  | -2.035 | 1.638  | 1.444  | -2.032 |
| Si    | -1.079 | 4.023  | 2.463  | -1.089 | 4.025  | 2.463  |
| Si    | -0.617 | 2.211  | -1.563 | -0.614 | 2.221  | -1.567 |
| Si    | -3.408 | 1.693  | 1.284  | -3.414 | 1.690  | 1.269  |
| Si    | -0.980 | 1.667  | 1.829  | -0.987 | 1.669  | 1.828  |
| Si    | -1.174 | 4.521  | -1.446 | -1.180 | 4.530  | -1.444 |
| Si    | 1.255  | 1.909  | 0.256  | 1.254  | 1.922  | 0.255  |
| Si    | 1.174  | 0.735  | 2.332  | 1.171  | 0.742  | 2.326  |
| Si    | 0.193  | 3.996  | 0.460  | 0.186  | 4.003  | 0.463  |
| Si    | -2.350 | 3.752  | 0.505  | -2.356 | 3.751  | 0.502  |
| Si    | -1.060 | -1.302 | -0.416 | -1.044 | -1.291 | -0.427 |
| Si    | 2.898  | -2.116 | -0.129 | 2.902  | -2.131 | -0.140 |
| Si    | -0.926 | -2.835 | 1.371  | -0.947 | -2.805 | 1.381  |
| Si    | 1.219  | -0.768 | -1.277 | 1.239  | -0.767 | -1.279 |
| Si    | -0.128 | -4.142 | -0.610 | -0.136 | -4.138 | -0.597 |
| Si    | -0.892 | -2.733 | -2.343 | -0.909 | -2.748 | -2.330 |
| Si    | 2.322  | -4.521 | -0.814 | 2.323  | -4.509 | -0.859 |
| Gd    | 1.485  | -4.100 | 1.742  | 1.520  | -4.205 | 1.846  |
| Si    | 1.531  | -2.917 | -2.373 | 1.517  | -2.898 | -2.418 |
| Si    | 0.962  | -1.324 | 1.138  | 0.974  | -1.327 | 1.142  |
| No.20 | PW91   |        |        | BLYP   |        |        |
| Si    | -2.075 | 0.778  | -0.258 | -2.065 | 0.779  | -0.236 |
| Si    | 1.569  | 1.365  | -1.974 | 1.566  | 1.391  | -2.004 |
| Si    | -1.069 | 4.062  | 2.482  | -1.033 | 4.187  | 2.501  |
| Si    | -0.663 | 2.160  | -1.509 | -0.708 | 2.188  | -1.561 |
| Si    | -3.404 | 1.687  | 1.397  | -3.421 | 1.702  | 1.414  |
| Si    | -0.969 | 1.694  | 1.899  | -1.008 | 1.749  | 2.072  |
| Si    | -1.247 | 4.464  | -1.431 | -1.328 | 4.520  | -1.444 |

|       |        |        |        |        |        |        |
|-------|--------|--------|--------|--------|--------|--------|
| Si    | 1.242  | 1.912  | 0.298  | 1.246  | 2.008  | 0.281  |
| Si    | 1.215  | 0.802  | 2.417  | 1.259  | 0.853  | 2.403  |
| Si    | 0.165  | 3.994  | 0.460  | 0.164  | 4.115  | 0.427  |
| Si    | -2.380 | 3.733  | 0.557  | -2.436 | 3.831  | 0.623  |
| Si    | -1.058 | -1.335 | -0.244 | -1.050 | -1.365 | -0.240 |
| Si    | 2.913  | -2.090 | -0.200 | 2.974  | -2.138 | -0.176 |
| Si    | -1.162 | -3.280 | 1.171  | -1.255 | -3.416 | 1.084  |
| Si    | 1.161  | -0.935 | -1.473 | 1.222  | -0.961 | -1.507 |
| Si    | -0.079 | -4.123 | -0.738 | -0.077 | -4.250 | -0.796 |
| Si    | -0.635 | -2.304 | -2.363 | -0.608 | -2.339 | -2.391 |
| Si    | 2.316  | -4.588 | -0.289 | 2.339  | -4.682 | -0.250 |
| Si    | 1.239  | -3.463 | 1.511  | 1.182  | -3.538 | 1.522  |
| Gd    | 1.842  | -3.450 | -2.724 | 1.915  | -3.528 | -2.751 |
| Si    | 1.074  | -1.086 | 1.009  | 1.118  | -1.107 | 1.025  |
| No.21 | PW91   |        |        | BLYP   |        |        |
| Si    | -1.170 | 0.702  | 0.797  | -1.150 | 0.699  | 0.858  |
| Si    | 1.643  | 1.248  | -1.913 | 1.654  | 1.232  | -1.878 |
| Si    | -1.212 | 5.022  | 1.805  | -1.251 | 5.076  | 1.719  |
| Si    | -0.643 | 1.786  | -1.296 | -0.639 | 1.746  | -1.274 |
| Si    | -3.051 | 1.670  | 1.910  | -3.028 | 1.703  | 1.954  |
| Si    | -1.100 | 2.811  | 2.587  | -1.087 | 2.893  | 2.569  |
| Si    | -1.777 | 3.825  | -1.777 | -1.818 | 3.743  | -1.814 |
| Si    | 1.246  | 2.114  | 0.284  | 1.247  | 2.159  | 0.289  |
| Si    | 0.693  | 1.275  | 2.431  | 0.722  | 1.366  | 2.458  |
| Si    | -0.043 | 4.086  | -0.082 | -0.074 | 4.095  | -0.145 |
| Si    | -2.533 | 3.549  | 0.493  | -2.554 | 3.536  | 0.468  |

|    |        |        |        |        |        |        |
|----|--------|--------|--------|--------|--------|--------|
| Si | -0.973 | -1.551 | -0.277 | -0.960 | -1.540 | -0.219 |
| Si | 3.069  | -2.178 | 0.038  | 3.072  | -2.253 | 0.050  |
| Si | -0.835 | -3.661 | 0.932  | -0.855 | -3.720 | 0.860  |
| Si | 1.269  | -0.854 | -0.847 | 1.297  | -0.858 | -0.770 |
| Si | -0.346 | -4.080 | -1.344 | -0.337 | -4.065 | -1.424 |
| Si | -0.330 | -1.991 | -2.588 | -0.318 | -1.907 | -2.550 |
| Si | 1.690  | -5.305 | -1.546 | 1.687  | -5.300 | -1.667 |
| Si | 1.535  | -4.007 | 0.445  | 1.510  | -4.086 | 0.382  |
| Si | 2.024  | -2.919 | -2.013 | 2.003  | -2.890 | -2.030 |
| Gd | 0.843  | -1.539 | 1.963  | 0.877  | -1.628 | 2.165  |

2. For structures in Table 2

| Eu@Si <sub>20</sub> |        |        |        |        |        |        |
|---------------------|--------|--------|--------|--------|--------|--------|
|                     | PW91   |        |        | BLYP   |        |        |
| Si                  | 13.145 | 10.158 | 15.835 | 13.046 | 10.188 | 16.002 |
| Si                  | 11.622 | 11.945 | 15.817 | 11.634 | 12.034 | 15.705 |
| Si                  | 9.445  | 11.276 | 15.369 | 9.442  | 11.275 | 15.392 |
| Si                  | 9.579  | 8.971  | 15.579 | 9.493  | 8.926  | 15.446 |
| Si                  | 11.782 | 8.188  | 15.693 | 11.709 | 8.267  | 15.813 |
| Si                  | 13.759 | 10.272 | 18.097 | 14.135 | 10.263 | 18.130 |
| Si                  | 11.684 | 13.301 | 17.692 | 11.678 | 13.295 | 17.697 |
| Si                  | 8.129  | 12.017 | 17.147 | 8.058  | 12.036 | 17.146 |
| Si                  | 8.193  | 8.208  | 17.267 | 8.202  | 8.260  | 17.291 |
| Si                  | 11.733 | 7.300  | 17.859 | 11.793 | 7.175  | 17.890 |
| Si                  | 13.106 | 12.198 | 19.197 | 13.097 | 12.147 | 19.173 |
| Si                  | 9.566  | 13.106 | 18.605 | 9.506  | 13.232 | 18.575 |
| Si                  | 7.540  | 10.135 | 18.367 | 7.164  | 10.144 | 18.334 |
| Si                  | 9.615  | 7.106  | 18.772 | 9.621  | 7.112  | 18.767 |
| Si                  | 13.170 | 8.390  | 19.316 | 13.241 | 8.371  | 19.318 |
| Si                  | 11.721 | 11.436 | 20.886 | 11.806 | 11.481 | 21.018 |
| Si                  | 9.518  | 12.219 | 20.771 | 9.590  | 12.140 | 20.652 |
| Si                  | 8.154  | 10.249 | 20.629 | 8.253  | 10.219 | 20.461 |
| Si                  | 9.677  | 8.462  | 20.648 | 9.666  | 8.373  | 20.759 |
| Si                  | 11.853 | 9.131  | 21.094 | 11.857 | 9.132  | 21.072 |
| Eu                  | 10.650 | 10.203 | 18.232 | 10.650 | 10.203 | 18.232 |

  

| [Eu@Si <sub>20</sub> ] <sub>2</sub> |        |        |        |        |        |        |
|-------------------------------------|--------|--------|--------|--------|--------|--------|
|                                     | PW91   |        |        | BLYP   |        |        |
| Si                                  | 1.956  | 0.000  | 0.039  | 1.956  | 0.000  | 0.039  |
| Si                                  | 0.600  | 1.843  | 0.057  | 0.600  | 1.843  | 0.057  |
| Si                                  | -1.577 | 1.144  | 0.042  | -1.577 | 1.144  | 0.042  |
| Si                                  | -1.577 | -1.144 | 0.042  | -1.577 | -1.144 | 0.042  |
| Si                                  | 0.600  | -1.843 | 0.057  | 0.600  | -1.843 | 0.057  |
| Si                                  | 3.086  | 0.000  | 2.075  | 3.086  | 0.000  | 2.075  |
| Si                                  | 0.952  | 2.944  | 2.079  | 0.952  | 2.944  | 2.079  |
| Si                                  | -2.494 | 1.815  | 2.075  | -2.494 | 1.815  | 2.075  |
| Si                                  | -2.494 | -1.815 | 2.075  | -2.494 | -1.815 | 2.075  |
| Si                                  | 0.952  | -2.944 | 2.079  | 0.952  | -2.944 | 2.079  |
| Si                                  | 2.802  | 2.038  | 3.213  | 2.802  | 2.038  | 3.213  |
| Si                                  | -1.075 | 3.303  | 3.217  | -1.075 | 3.303  | 3.217  |
| Si                                  | -3.462 | 0.000  | 3.211  | -3.462 | 0.000  | 3.211  |
| Si                                  | -1.075 | -3.303 | 3.217  | -1.075 | -3.303 | 3.217  |
| Si                                  | 2.802  | -2.038 | 3.213  | 2.802  | -2.038 | 3.213  |
| Si                                  | 1.644  | 1.193  | 5.100  | 1.644  | 1.193  | 5.100  |
| Si                                  | -0.627 | 1.931  | 5.099  | -0.627 | 1.931  | 5.099  |
| Si                                  | -2.029 | 0.000  | 5.099  | -2.029 | 0.000  | 5.099  |
| Si                                  | -0.627 | -1.931 | 5.099  | -0.627 | -1.931 | 5.099  |
| Si                                  | 1.644  | -1.193 | 5.100  | 1.644  | -1.193 | 5.100  |
| Si                                  | 1.644  | 1.193  | 7.545  | 1.644  | 1.193  | 7.545  |
| Si                                  | -0.627 | 1.931  | 7.545  | -0.627 | 1.931  | 7.545  |
| Si                                  | -2.029 | -0.000 | 7.545  | -2.029 | -0.000 | 7.545  |
| Si                                  | -0.627 | -1.931 | 7.545  | -0.627 | -1.931 | 7.545  |
| Si                                  | 1.644  | -1.193 | 7.545  | 1.644  | -1.193 | 7.545  |
| Si                                  | 2.802  | 2.038  | 9.432  | 2.802  | 2.038  | 9.432  |
| Si                                  | -1.075 | 3.303  | 9.427  | -1.075 | 3.303  | 9.427  |
| Si                                  | -3.462 | -0.000 | 9.433  | -3.462 | -0.000 | 9.433  |
| Si                                  | -1.075 | -3.303 | 9.427  | -1.075 | -3.303 | 9.427  |
| Si                                  | 2.802  | -2.038 | 9.432  | 2.802  | -2.038 | 9.432  |
| Si                                  | 3.086  | 0.000  | 10.569 | 3.086  | 0.000  | 10.569 |
| Si                                  | 0.952  | 2.944  | 10.566 | 0.952  | 2.944  | 10.566 |
| Si                                  | -2.494 | 1.815  | 10.570 | -2.494 | 1.815  | 10.570 |
| Si                                  | -2.494 | -1.815 | 10.570 | -2.494 | -1.815 | 10.570 |
| Si                                  | 0.952  | -2.944 | 10.566 | 0.952  | -2.944 | 10.566 |
| Si                                  | 1.956  | 0.000  | 12.605 | 1.956  | 0.000  | 12.605 |
| Si                                  | 0.600  | 1.843  | 12.587 | 0.600  | 1.843  | 12.587 |
| Si                                  | -1.577 | 1.144  | 12.602 | -1.577 | 1.144  | 12.602 |
| Si                                  | -1.577 | -1.144 | 12.602 | -1.577 | -1.144 | 12.602 |

|    |       |        |        |       |        |        |
|----|-------|--------|--------|-------|--------|--------|
| Si | 0.600 | -1.843 | 12.587 | 0.600 | -1.843 | 12.587 |
| Eu | 0.000 | 0.000  | 2.638  | 0.000 | 0.000  | 2.638  |
| Eu | 0.000 | -0.000 | 10.007 | 0.000 | -0.000 | 10.007 |

  

| Unit cell of [Eu@Si <sub>20</sub> ] <sub>n→∞</sub> |        |         |        |        |         |        |
|----------------------------------------------------|--------|---------|--------|--------|---------|--------|
|                                                    | PW91   |         |        | BLYP   |         |        |
|                                                    | 21.829 | 20.626  | 15.215 | 21.194 | 20.617  | 15.215 |
|                                                    | 90.19  | 88.91   | 88.32  | 90.22  | 88.93   | 90.03  |
| Si                                                 | 12.469 | -10.402 | 0.243  | 12.497 | -10.379 | 0.242  |
| Si                                                 | 11.112 | -8.438  | 0.276  | 11.078 | -8.419  | 0.277  |
| Si                                                 | 8.834  | -9.180  | 0.316  | 8.778  | -9.170  | 0.323  |
| Si                                                 | 8.760  | -11.571 | 0.312  | 8.780  | -11.589 | 0.315  |
| Si                                                 | 11.030 | -12.314 | 0.262  | 11.079 | -12.339 | 0.264  |
| Si                                                 | 13.755 | -10.408 | 2.233  | 13.805 | -10.387 | 2.240  |
| Si                                                 | 11.571 | -7.278  | 2.290  | 11.508 | -7.224  | 2.298  |
| Si                                                 | 7.896  | -8.465  | 2.374  | 7.793  | -8.435  | 2.368  |
| Si                                                 | 7.773  | -12.305 | 2.339  | 7.794  | -12.342 | 2.352  |
| Si                                                 | 11.419 | -13.486 | 2.285  | 11.509 | -13.551 | 2.274  |
| Si                                                 | 13.219 | -8.475  | 3.418  | 13.192 | -8.438  | 3.404  |
| Si                                                 | 9.573  | -7.294  | 3.471  | 9.476  | -7.229  | 3.482  |
| Si                                                 | 7.236  | -10.372 | 3.524  | 7.181  | -10.393 | 3.516  |
| Si                                                 | 9.420  | -13.502 | 3.467  | 9.477  | -13.556 | 3.459  |
| Si                                                 | 13.096 | -12.315 | 3.383  | 13.193 | -12.346 | 3.389  |
| Si                                                 | 12.232 | -9.209  | 5.445  | 12.206 | -9.192  | 5.442  |
| Si                                                 | 9.961  | -8.466  | 5.495  | 9.907  | -8.441  | 5.493  |
| Si                                                 | 8.522  | -10.379 | 5.514  | 8.488  | -10.402 | 5.515  |
| Si                                                 | 9.880  | -12.342 | 5.480  | 9.908  | -12.361 | 5.480  |
| Si                                                 | 12.158 | -11.600 | 5.440  | 12.207 | -11.610 | 5.433  |
| Si                                                 | 12.276 | -9.221  | 7.861  | 12.254 | -9.200  | 7.860  |
| Si                                                 | 10.005 | -8.477  | 7.905  | 9.955  | -8.450  | 7.910  |
| Si                                                 | 8.567  | -10.391 | 7.926  | 8.537  | -10.409 | 7.932  |
| Si                                                 | 9.923  | -12.354 | 7.896  | 9.957  | -12.367 | 7.897  |
| Si                                                 | 12.201 | -11.611 | 7.851  | 12.257 | -11.620 | 7.851  |
| Si                                                 | 13.346 | -8.502  | 9.850  | 13.312 | -8.464  | 9.870  |
| Si                                                 | 9.694  | -7.322  | 9.952  | 9.596  | -7.255  | 9.944  |
| Si                                                 | 7.360  | -10.397 | 9.965  | 7.301  | -10.418 | 9.974  |
| Si                                                 | 9.541  | -13.523 | 9.921  | 9.598  | -13.580 | 9.920  |
| Si                                                 | 13.222 | -12.339 | 9.862  | 13.315 | -12.372 | 9.855  |
| Si                                                 | 13.922 | -10.442 | 11.004 | 13.968 | -10.421 | 10.995 |
| Si                                                 | 11.741 | -7.316  | 11.048 | 11.671 | -7.259  | 11.049 |
| Si                                                 | 8.060  | -8.500  | 11.107 | 7.954  | -8.467  | 11.114 |
| Si                                                 | 7.936  | -12.337 | 11.119 | 7.957  | -12.375 | 11.099 |
| Si                                                 | 11.588 | -13.517 | 11.017 | 11.674 | -13.585 | 11.025 |
| Si                                                 | 12.715 | -10.448 | 13.043 | 12.733 | -10.429 | 13.037 |
| Si                                                 | 11.360 | -8.485  | 13.072 | 11.313 | -8.471  | 13.072 |
| Si                                                 | 9.081  | -9.228  | 13.118 | 9.012  | -9.219  | 13.118 |
| Si                                                 | 9.007  | -11.618 | 13.108 | 9.015  | -11.639 | 13.109 |
| Si                                                 | 11.277 | -12.362 | 13.064 | 11.314 | -12.389 | 13.059 |
| Eu                                                 | 10.496 | -10.390 | 2.878  | 10.493 | -10.390 | 2.878  |
| Eu                                                 | 10.641 | -10.420 | 10.485 | 10.635 | -10.419 | 10.485 |

3. For structures in Table 3

| No. (1,2) |        |        |        |
|-----------|--------|--------|--------|
| Eu        | 0.910  | 2.390  | 1.113  |
| Eu        | -0.572 | 0.652  | -1.353 |
| Si        | 1.944  | -1.108 | 0.895  |
| Si        | -0.829 | -0.024 | 1.607  |
| Si        | -0.417 | -2.210 | -1.131 |
| Si        | -2.203 | 2.041  | 0.448  |
| Si        | 0.060  | 1.139  | 3.679  |
| Si        | 1.696  | -1.002 | -1.755 |
| Si        | -2.427 | -1.670 | 0.119  |
| Si        | -0.014 | 4.279  | -1.167 |
| Si        | 3.424  | 0.706  | 1.152  |
| Si        | 0.385  | -4.025 | 0.259  |
| Si        | -3.503 | 0.149  | -0.888 |
| Si        | 0.821  | -2.802 | 2.188  |
| Si        | 0.254  | 1.891  | -4.182 |
| Si        | 2.825  | 1.116  | -1.325 |
| Si        | -2.115 | 3.406  | -1.699 |
| Si        | 2.991  | -2.372 | 3.042  |
| Si        | -1.468 | -1.455 | -3.361 |
| Si        | 3.427  | -2.375 | -0.635 |
| Si        | 0.085  | -0.427 | 5.505  |
| Si        | -1.998 | 2.081  | -3.544 |
| Si        | -1.761 | 4.254  | 1.504  |
| Si        | -3.229 | 1.036  | 2.505  |
| Si        | -1.948 | -4.087 | -0.549 |
| Si        | 1.283  | -3.469 | -2.592 |
| Si        | 4.473  | -1.482 | 1.343  |
| Si        | 0.513  | -0.400 | -3.991 |
| Si        | 2.551  | 1.600  | 3.444  |
| Si        | 0.278  | 5.321  | 0.889  |
| Si        | 1.388  | 2.757  | -2.303 |
| Si        | -3.212 | 0.087  | -3.220 |
| Si        | -0.663 | -1.564 | 3.532  |
| Si        | -2.775 | -1.288 | 2.468  |
| Si        | 2.091  | -0.534 | 4.184  |
| Si        | 4.110  | -0.801 | -2.430 |
| Si        | -1.143 | -3.774 | -2.896 |
| Si        | -4.597 | 1.683  | 0.636  |
| Si        | -3.767 | 3.999  | 0.030  |
| Si        | 2.483  | -4.645 | -0.912 |
| Si        | -1.749 | 2.773  | 3.381  |
| Si        | 2.393  | -1.843 | -3.993 |
| No. (1,3) |        |        |        |
| Eu        | 0.508  | 1.880  | -0.370 |
| Si        | -1.596 | 0.018  | -0.996 |
| Eu        | 1.411  | -0.909 | 0.228  |
| Si        | -1.087 | -1.195 | 1.951  |
| Si        | -0.574 | -2.075 | -1.401 |
| Si        | -1.785 | 1.185  | 1.218  |
| Si        | 0.546  | 0.623  | 2.429  |
| Si        | 1.045  | -0.525 | -2.593 |
| Si        | -2.790 | -2.041 | 0.449  |
| Si        | 0.883  | 4.714  | -1.076 |
| Si        | 3.701  | 1.150  | 0.837  |
| Si        | 0.209  | -3.587 | 0.641  |
| Si        | -3.935 | -0.291 | -0.783 |
| Si        | 0.555  | -2.940 | 2.883  |
| Si        | 0.649  | 1.667  | -3.511 |
| Si        | 3.427  | 1.465  | -1.448 |
| Si        | -1.422 | 4.090  | -1.712 |
| Si        | 2.226  | -1.183 | 3.018  |
| Si        | -1.317 | -1.377 | -3.694 |
| Si        | 3.837  | -2.247 | -0.380 |
| Si        | -0.486 | 0.323  | 4.536  |
| Si        | -1.487 | 1.945  | -2.644 |

| Si        | -1.029 | 3.446  | 2.047  |
|-----------|--------|--------|--------|
| Si        | -3.549 | 0.711  | 2.682  |
| Si        | -1.882 | -4.118 | -0.550 |
| Si        | 1.289  | -3.243 | -2.639 |
| Si        | 4.199  | -1.047 | 1.643  |
| Si        | 0.542  | -0.371 | -4.993 |
| Si        | 2.156  | 2.347  | 2.194  |
| Si        | 1.103  | 4.393  | 1.470  |
| Si        | 2.211  | 3.206  | -2.539 |
| Si        | -3.097 | 0.186  | -3.081 |
| Si        | -1.357 | -2.016 | 4.200  |
| Si        | -3.436 | -1.781 | 2.833  |
| Si        | 1.949  | 0.686  | 4.524  |
| Si        | 3.484  | -0.766 | -2.194 |
| Si        | -1.093 | -3.771 | -3.105 |
| Si        | -4.266 | 1.744  | 0.619  |
| Si        | -2.485 | 3.375  | 0.252  |
| Si        | 2.237  | -3.930 | -0.607 |
| Si        | -1.979 | 2.085  | 3.836  |
| Si        | 2.483  | -1.822 | -4.176 |
| No. (1,4) |        |        |        |
| Eu        | 0.677  | 1.405  | -0.498 |
| Si        | -1.663 | 0.136  | -1.416 |
| Si        | 1.892  | -0.906 | 0.677  |
| Eu        | -0.977 | -0.919 | 1.242  |
| Si        | -0.118 | -1.666 | -1.425 |
| Si        | -2.009 | 1.840  | 0.701  |
| Si        | -0.176 | 1.638  | 2.308  |
| Si        | 1.710  | -0.520 | -2.452 |
| Si        | -3.557 | -2.392 | 0.504  |
| Si        | 0.804  | 4.396  | -0.852 |
| Si        | 3.590  | 0.949  | 0.711  |
| Si        | 0.588  | -3.524 | 0.655  |
| Si        | -3.861 | -0.287 | -0.691 |
| Si        | 0.631  | -2.950 | 2.952  |
| Si        | 0.631  | 1.568  | -3.519 |
| Si        | 3.458  | 1.216  | -1.638 |
| Si        | -1.443 | 3.546  | -1.030 |
| Si        | 2.225  | -1.204 | 3.019  |
| Si        | -1.398 | -1.326 | -3.547 |
| Si        | 3.472  | -2.234 | -0.477 |
| Si        | -0.342 | 0.247  | 4.233  |
| Si        | -1.585 | 2.031  | -2.861 |
| Si        | -1.418 | 3.781  | 2.504  |
| Si        | -3.374 | 0.646  | 2.578  |
| Si        | -1.546 | -3.371 | -0.403 |
| Si        | 1.281  | -3.337 | -2.590 |
| Si        | 4.220  | -1.257 | 1.596  |
| Si        | 0.565  | -0.455 | -4.789 |
| Si        | 2.222  | 2.063  | 2.303  |
| Si        | 0.939  | 3.877  | 1.503  |
| Si        | 2.218  | 3.119  | -2.550 |
| Si        | -3.338 | 0.170  | -3.192 |
| Si        | -1.238 | -1.979 | 4.009  |
| Si        | -3.351 | -1.692 | 2.816  |
| Si        | 2.083  | 0.749  | 4.425  |
| Si        | 4.179  | -0.993 | -2.473 |
| Si        | -1.139 | -3.653 | -2.856 |
| Si        | -4.515 | 1.706  | 0.750  |
| Si        | -3.192 | 3.972  | 0.651  |
| Si        | 2.371  | -4.374 | -0.739 |
| Si        | -2.032 | 1.950  | 4.086  |
| Si        | 2.512  | -1.962 | -4.230 |
| No. (1,5) |        |        |        |
| Eu        | 0.277  | 1.484  | -0.177 |
| Si        | -2.208 | 1.519  | -2.229 |

| Si        | 2.037  | -0.699 | 0.840  |
|-----------|--------|--------|--------|
| Si        | -1.388 | -0.753 | 1.582  |
| Eu        | -0.593 | -1.532 | -0.964 |
| Si        | -3.177 | 1.993  | -0.191 |
| Si        | -0.144 | 0.917  | 2.714  |
| Si        | 1.976  | -1.005 | -1.810 |
| Si        | -2.950 | -2.616 | 0.676  |
| Si        | 1.265  | 4.238  | -0.694 |
| Si        | 3.826  | 1.122  | 0.780  |
| Si        | 0.403  | -4.216 | 0.761  |
| Si        | -3.948 | -0.986 | -0.602 |
| Si        | 0.573  | -2.364 | 2.168  |
| Si        | 0.144  | 1.955  | -3.323 |
| Si        | 3.317  | 1.086  | -1.500 |
| Si        | -0.887 | 4.249  | -1.451 |
| Si        | 2.547  | -1.524 | 3.174  |
| Si        | -1.589 | -1.820 | -3.955 |
| Si        | 3.919  | -2.250 | -0.533 |
| Si        | -0.427 | 0.537  | 5.088  |
| Si        | -1.708 | 3.456  | -3.600 |
| Si        | -0.892 | 3.287  | 2.129  |
| Si        | -3.257 | 0.627  | 2.254  |
| Si        | -1.637 | -4.212 | -0.439 |
| Si        | 1.231  | -3.493 | -2.934 |
| Si        | 4.353  | -1.124 | 1.552  |
| Si        | 0.380  | -0.415 | -3.672 |
| Si        | 2.216  | 1.992  | 2.212  |
| Si        | 1.322  | 4.048  | 1.666  |
| Si        | 2.118  | 2.843  | -2.348 |
| Si        | -3.074 | -0.587 | -2.683 |
| Si        | -0.947 | -1.645 | 3.863  |
| Si        | -3.190 | -1.734 | 3.002  |
| Si        | 1.919  | 0.664  | 4.169  |
| Si        | 4.241  | -0.929 | -2.599 |
| Si        | -1.076 | -3.810 | -2.766 |
| Si        | -4.992 | 0.798  | 0.601  |
| Si        | -2.239 | 4.000  | 0.414  |
| Si        | 1.951  | -3.495 | -0.786 |
| Si        | -2.080 | 2.102  | 3.895  |
| Si        | 2.382  | -1.708 | -4.286 |
| No. (1,6) |        |        |        |
| Eu        | 0.895  | 1.163  | -0.570 |
| Si        | -1.509 | -0.471 | -1.415 |
| Si        | 2.406  | -0.940 | 0.556  |
| Si        | -0.799 | -1.621 | 1.713  |
| Si        | 0.489  | -1.879 | -0.542 |
| Eu        | -1.662 | 1.082  | 1.063  |
| Si        | 0.811  | 0.193  | 2.188  |
| Si        | 0.841  | -0.629 | -2.710 |
| Si        | -3.107 | -1.768 | 0.374  |
| Si        | 0.742  | 4.318  | -0.914 |
| Si        | 3.689  | 1.159  | 0.751  |
| Si        | 0.071  | -3.864 | 0.858  |
| Si        | -3.941 | 0.043  | -0.835 |
| Si        | 0.530  | -3.140 | 3.285  |
| Si        | 0.532  | 1.659  | -3.619 |
| Si        | 3.830  | 1.693  | -1.592 |
| Si        | -1.472 | 3.515  | -1.072 |
| Si        | 2.432  | -1.389 | 3.039  |
| Si        | -1.359 | -1.362 | -3.699 |
| Si        | 4.104  | -2.254 | -0.576 |
| Si        | -0.531 | 0.557  | 4.144  |
| Si        | -1.570 | 1.864  | -2.648 |
| Si        | -1.588 | 3.845  | 2.333  |
| Si        | -4.127 | 1.036  | 2.929  |
| Si        | -1.550 | -3.073 | -0.943 |

|           |        |        |        |
|-----------|--------|--------|--------|
| Si        | 1.099  | -3.159 | -2.610 |
| Si        | 4.584  | -0.996 | 1.632  |
| Si        | 0.509  | -0.322 | -5.119 |
| Si        | 2.161  | 2.199  | 2.270  |
| Si        | 0.528  | 3.587  | 1.325  |
| Si        | 2.042  | 3.006  | -2.418 |
| Si        | -3.224 | 0.212  | -3.217 |
| Si        | -1.381 | -1.734 | 4.124  |
| Si        | -3.200 | -1.122 | 2.669  |
| Si        | 1.951  | 0.734  | 4.285  |
| Si        | 3.249  | -0.540 | -2.112 |
| Si        | -1.198 | -3.782 | -3.265 |
| Si        | -4.611 | 1.853  | 0.651  |
| Si        | -3.124 | 3.787  | 0.526  |
| Si        | 2.169  | -3.884 | -0.581 |
| Si        | -2.196 | 2.180  | 3.848  |
| Si        | 2.482  | -1.751 | -4.109 |
| No. (1,7) |        |        |        |
| Eu        | -0.127 | 0.769  | -1.516 |
| Si        | -2.953 | -0.433 | -1.898 |
| Si        | 1.683  | -0.969 | 0.639  |
| Si        | -1.421 | -1.255 | 1.523  |
| Si        | -1.547 | -2.319 | -1.866 |
| Si        | -2.508 | 0.471  | 0.287  |
| Eu        | 0.068  | 1.284  | 1.620  |
| Si        | 1.990  | -0.928 | -1.928 |
| Si        | -3.563 | -2.330 | 1.232  |
| Si        | 0.740  | 3.651  | -0.436 |
| Si        | 3.134  | 1.036  | 0.894  |
| Si        | 0.606  | -3.182 | 1.108  |
| Si        | -4.692 | -0.565 | -0.164 |
| Si        | 0.925  | -3.301 | 3.546  |
| Si        | 0.894  | 2.331  | -4.069 |
| Si        | 3.287  | 1.124  | -1.437 |
| Si        | -1.377 | 3.706  | -1.368 |
| Si        | 2.225  | -1.345 | 3.066  |
| Si        | -0.904 | -0.882 | -4.211 |
| Si        | 3.620  | -2.218 | -0.439 |
| Si        | -0.138 | 0.630  | 4.608  |
| Si        | -1.324 | 2.601  | -3.392 |
| Si        | -1.259 | 3.916  | 2.416  |
| Si        | -3.178 | 0.708  | 2.908  |
| Si        | -1.615 | -3.418 | 0.236  |
| Si        | 1.097  | -3.032 | -2.713 |
| Si        | 4.047  | -1.075 | 1.579  |
| Si        | 1.173  | 0.011  | -4.203 |
| Si        | 2.827  | 2.657  | 2.599  |
| Si        | 1.067  | 4.246  | 1.838  |
| Si        | 2.107  | 2.961  | -2.185 |
| Si        | -2.629 | 0.701  | -3.917 |
| Si        | -0.696 | -1.504 | 3.732  |
| Si        | -3.151 | -1.596 | 3.489  |
| Si        | 2.019  | 0.840  | 3.892  |
| Si        | 4.397  | -0.900 | -2.342 |
| Si        | -1.020 | -3.293 | -3.916 |
| Si        | -4.469 | 1.607  | 1.116  |
| Si        | -2.432 | 2.930  | 0.572  |
| Si        | 2.000  | -4.014 | -0.726 |
| Si        | -1.746 | 2.169  | 3.927  |
| Si        | 2.839  | -1.789 | -4.106 |
| No. (1,8) |        |        |        |
| Eu        | 0.494  | 1.684  | 0.048  |
| Si        | -2.991 | -0.857 | -2.082 |
| Si        | 2.023  | -0.622 | 0.979  |
| Si        | -0.550 | -0.976 | 1.145  |
| Si        | -1.933 | -2.904 | -1.716 |
| Si        | -2.110 | 0.320  | -0.148 |
| Si        | -0.672 | 0.975  | 2.650  |

|           |        |        |        |
|-----------|--------|--------|--------|
| Eu        | 0.614  | -0.918 | -1.737 |
| Si        | -2.909 | -1.960 | 1.265  |
| Si        | 0.892  | 4.412  | -0.855 |
| Si        | 3.716  | 1.156  | 0.835  |
| Si        | -0.085 | -3.275 | 0.336  |
| Si        | -4.365 | -0.625 | -0.132 |
| Si        | 0.599  | -2.663 | 2.696  |
| Si        | 0.951  | 1.734  | -3.519 |
| Si        | 3.311  | 1.284  | -1.455 |
| Si        | -1.335 | 3.833  | -1.534 |
| Si        | 2.583  | -1.363 | 3.193  |
| Si        | -0.833 | -0.914 | -4.451 |
| Si        | 3.285  | -2.017 | -0.478 |
| Si        | -0.178 | 0.586  | 5.033  |
| Si        | -1.197 | 1.870  | -2.818 |
| Si        | -0.943 | 3.327  | 2.256  |
| Si        | -3.120 | 0.791  | 3.095  |
| Si        | -2.332 | -4.116 | 0.292  |
| Si        | 1.483  | -3.427 | -3.035 |
| Si        | 4.409  | -1.099 | 1.533  |
| Si        | 1.227  | -0.031 | -5.059 |
| Si        | 2.460  | 2.540  | 2.238  |
| Si        | 1.134  | 4.401  | 1.597  |
| Si        | 2.280  | 3.165  | -2.257 |
| Si        | -2.718 | 0.472  | -4.041 |
| Si        | -1.028 | -1.344 | 3.775  |
| Si        | -3.391 | -1.554 | 3.592  |
| Si        | 1.645  | 0.821  | 3.564  |
| Si        | 4.033  | -0.771 | -2.336 |
| Si        | -0.725 | -3.140 | -3.657 |
| Si        | -4.093 | 1.491  | 1.056  |
| Si        | -2.258 | 2.867  | 0.379  |
| Si        | 1.958  | -3.962 | -0.775 |
| Si        | -1.889 | 2.412  | 4.434  |
| Si        | 2.553  | -1.599 | -3.908 |
| No. (2,3) |        |        |        |
| Si        | 1.351  | 1.836  | 0.664  |
| Eu        | -0.535 | 0.526  | -1.338 |
| Eu        | 1.289  | -0.984 | 0.658  |
| Si        | -1.207 | -1.089 | 2.026  |
| Si        | -0.311 | -2.378 | -1.347 |
| Si        | -2.312 | 1.709  | 0.463  |
| Si        | -0.543 | 1.138  | 1.913  |
| Si        | 2.228  | -0.338 | -1.971 |
| Si        | -2.674 | -1.888 | 0.313  |
| Si        | 0.654  | 3.691  | -0.760 |
| Si        | 3.629  | 1.121  | 0.552  |
| Si        | 0.246  | -3.932 | 0.734  |
| Si        | -3.577 | 0.029  | -0.757 |
| Si        | 0.480  | -2.736 | 2.808  |
| Si        | 0.321  | 1.929  | -4.032 |
| Si        | 4.128  | 1.543  | -1.858 |
| Si        | -1.655 | 3.334  | -1.214 |
| Si        | 2.628  | -1.497 | 3.235  |
| Si        | -1.442 | -1.446 | -3.427 |
| Si        | 3.662  | -2.024 | -0.730 |
| Si        | -0.534 | 0.418  | 4.256  |
| Si        | -1.902 | 2.286  | -3.305 |
| Si        | -1.342 | 3.370  | 2.325  |
| Si        | -3.433 | 0.779  | 2.688  |
| Si        | -1.920 | -4.100 | -0.487 |
| Si        | 1.146  | -3.668 | -3.043 |
| Si        | 4.167  | -1.065 | 1.405  |
| Si        | 0.565  | -0.399 | -4.048 |
| Si        | 2.873  | 2.584  | 2.482  |
| Si        | 0.986  | 4.141  | 1.653  |
| Si        | 1.856  | 2.306  | -2.263 |
| Si        | -3.114 | 0.205  | -3.104 |
| Si        | -1.375 | -1.976 | 4.302  |

|           |        |        |        |
|-----------|--------|--------|--------|
| Si        | -3.436 | -1.621 | 2.748  |
| Si        | 1.699  | 0.641  | 3.443  |
| Si        | 4.449  | -0.927 | -2.822 |
| Si        | -1.316 | -3.874 | -3.028 |
| Si        | -4.687 | 1.698  | 0.837  |
| Si        | -3.120 | 3.965  | 0.654  |
| Si        | 1.959  | -3.648 | -0.856 |
| Si        | -2.305 | 2.162  | 4.316  |
| Si        | 2.421  | -1.816 | -4.086 |
| No. (2,4) |        |        |        |
| Si        | 0.613  | 1.979  | 0.954  |
| Eu        | -0.220 | 0.820  | -1.525 |
| Si        | 1.716  | -0.684 | 0.373  |
| Eu        | -0.806 | -0.705 | 1.484  |
| Si        | -0.381 | -1.949 | -1.254 |
| Si        | -2.055 | 1.727  | 0.551  |
| Si        | 1.034  | 1.165  | 3.224  |
| Si        | 1.801  | -1.015 | -2.126 |
| Si        | -3.276 | -2.082 | 0.370  |
| Si        | 0.505  | 3.683  | -0.965 |
| Si        | 3.266  | 1.274  | 0.517  |
| Si        | 0.486  | -3.477 | 0.590  |
| Si        | -3.365 | 0.070  | -0.697 |
| Si        | 0.539  | -3.105 | 2.919  |
| Si        | 0.261  | 1.924  | -4.308 |
| Si        | 3.030  | 1.124  | -1.842 |
| Si        | -1.756 | 3.415  | -1.438 |
| Si        | 1.982  | -1.194 | 2.940  |
| Si        | -1.430 | -1.329 | -3.422 |
| Si        | 3.430  | -2.166 | -0.543 |
| Si        | -0.563 | -0.273 | 4.756  |
| Si        | -1.939 | 2.292  | -3.465 |
| Si        | -1.292 | 3.629  | 2.117  |
| Si        | -3.307 | 0.696  | 2.539  |
| Si        | -1.732 | -3.732 | -0.396 |
| Si        | 1.189  | -3.423 | -2.551 |
| Si        | 3.966  | -0.864 | 1.441  |
| Si        | 0.579  | -0.405 | -4.223 |
| Si        | 2.576  | 2.838  | 2.240  |
| Si        | 0.871  | 4.414  | 1.303  |
| Si        | 1.798  | 2.883  | -2.781 |
| Si        | -3.081 | 0.273  | -3.033 |
| Si        | -1.450 | -2.268 | 3.937  |
| Si        | -3.406 | -1.680 | 2.672  |
| Si        | 1.864  | 0.013  | 5.082  |
| Si        | 4.198  | -0.970 | -2.628 |
| Si        | -1.227 | -3.674 | -2.848 |
| Si        | -4.569 | 1.731  | 0.742  |
| Si        | -3.178 | 3.852  | 0.491  |
| Si        | 2.380  | -4.387 | -0.639 |
| Si        | -1.486 | 1.631  | 3.673  |
| Si        | 2.430  | -2.047 | -4.234 |
| No. (2,5) |        |        |        |
| Si        | 1.260  | 1.127  | 0.379  |
| Eu        | -0.348 | 0.892  | -1.765 |
| Si        | 1.960  | -0.951 | 1.186  |
| Si        | -1.213 | -1.013 | 1.943  |
| Eu        | -0.137 | -1.664 | -0.578 |
| Si        | -2.104 | 1.729  | 0.290  |
| Si        | -0.503 | 1.242  | 2.005  |
| Si        | 1.841  | -0.826 | -2.320 |
| Si        | -2.896 | -2.087 | 0.496  |
| Si        | 0.539  | 3.492  | -0.707 |
| Si        | 3.636  | 1.095  | 0.863  |
| Si        | 0.201  | -4.317 | 0.691  |
| Si        | -3.355 | -0.062 | -0.767 |
| Si        | 0.575  | -2.688 | 2.400  |
| Si        | 0.266  | 2.104  | -4.329 |



|           |        |        |        |
|-----------|--------|--------|--------|
| Si        | 2.967  | 1.231  | -1.593 |
| Si        | -1.738 | 3.506  | -1.361 |
| Si        | 2.625  | -1.544 | 3.376  |
| Si        | -1.415 | -1.332 | -3.520 |
| Si        | 3.215  | -2.134 | -0.475 |
| Si        | -0.265 | 0.315  | 4.233  |
| Si        | -2.013 | 2.453  | -3.511 |
| Si        | -1.300 | 3.538  | 2.139  |
| Si        | -3.204 | 0.703  | 2.585  |
| Si        | -1.889 | -4.023 | -0.513 |
| Si        | 1.121  | -3.258 | -2.820 |
| Si        | 4.343  | -1.284 | 1.546  |
| Si        | 0.556  | -0.289 | -4.362 |
| Si        | 2.022  | 2.238  | 2.350  |
| Si        | 0.934  | 4.348  | 1.547  |
| Si        | 1.858  | 3.103  | -2.683 |
| Si        | -3.041 | 0.281  | -3.093 |
| Si        | -1.085 | -2.016 | 4.136  |
| Si        | -3.314 | -1.666 | 2.931  |
| Si        | 2.091  | 0.717  | 4.356  |
| Si        | 4.208  | -0.884 | -2.432 |
| Si        | -1.218 | -3.563 | -2.854 |
| Si        | -4.488 | 1.573  | 0.768  |
| Si        | -3.264 | 3.865  | 0.574  |
| Si        | 2.000  | -4.133 | -0.843 |
| Si        | -1.955 | 2.097  | 4.117  |
| Si        | 2.526  | -1.911 | -4.387 |
| No. (2,6) |        |        |        |
| Si        | 1.699  | 0.996  | 0.743  |
| Eu        | -0.388 | 0.761  | -1.485 |
| Si        | 0.589  | -1.171 | 0.933  |
| Si        | -0.204 | -0.670 | 3.207  |
| Si        | -0.399 | -2.041 | -1.340 |
| Eu        | -1.253 | 1.306  | 1.208  |
| Si        | 1.059  | 2.802  | 2.504  |
| Si        | 1.771  | -1.005 | -2.052 |
| Si        | -2.515 | -1.763 | 0.114  |
| Si        | 0.113  | 3.691  | -0.754 |
| Si        | 4.182  | 0.928  | 0.651  |
| Si        | 0.489  | -3.652 | 0.347  |
| Si        | -3.465 | 0.032  | -0.966 |
| Si        | 0.362  | -3.218 | 2.706  |
| Si        | 0.305  | 2.049  | -4.093 |
| Si        | 2.801  | 1.139  | -1.473 |
| Si        | -2.003 | 3.507  | -1.573 |
| Si        | 2.166  | -1.676 | 3.170  |
| Si        | -1.394 | -1.310 | -3.504 |
| Si        | 3.416  | -2.434 | -0.916 |
| Si        | -0.168 | 1.565  | 4.065  |
| Si        | -1.956 | 2.246  | -3.494 |
| Si        | -2.148 | 3.975  | 2.172  |
| Si        | -3.715 | 0.640  | 2.822  |
| Si        | -1.767 | -3.944 | -0.605 |
| Si        | 1.233  | -3.411 | -2.802 |
| Si        | 3.111  | -1.201 | 1.015  |
| Si        | 0.604  | -0.284 | -4.209 |
| Si        | 3.060  | 1.648  | 2.750  |
| Si        | 0.032  | 4.580  | 1.436  |
| Si        | 1.698  | 3.055  | -2.424 |
| Si        | -3.154 | 0.217  | -3.277 |
| Si        | -1.389 | -2.499 | 4.190  |
| Si        | -2.582 | -1.356 | 2.443  |
| Si        | 2.118  | 0.281  | 4.575  |
| Si        | 4.200  | -0.850 | -2.639 |
| Si        | -1.144 | -3.672 | -3.108 |
| Si        | -4.363 | 1.371  | 0.683  |
| Si        | -3.360 | 3.409  | 0.305  |
| Si        | 2.333  | -4.585 | -1.000 |
| Si        | -2.446 | 2.367  | 3.939  |

|           |        |        |        |
|-----------|--------|--------|--------|
| Si        | 2.470  | -1.818 | -4.261 |
| No. (2,7) |        |        |        |
| Si        | 1.960  | 1.290  | -1.093 |
| Eu        | -0.736 | 0.375  | -1.066 |
| Si        | 1.016  | -1.437 | 0.634  |
| Si        | -1.193 | -0.817 | 1.927  |
| Si        | -0.531 | -2.322 | -1.206 |
| Si        | -2.256 | 1.615  | 0.956  |
| Eu        | 0.681  | 1.293  | 1.572  |
| Si        | 1.590  | -1.009 | -1.933 |
| Si        | -2.660 | -1.918 | 0.212  |
| Si        | 0.657  | 3.540  | -0.597 |
| Si        | 3.611  | 1.503  | 0.710  |
| Si        | 0.403  | -3.854 | 0.537  |
| Si        | -3.679 | 0.007  | -0.746 |
| Si        | 0.368  | -2.758 | 2.673  |
| Si        | 0.358  | 1.897  | -3.524 |
| Si        | 4.241  | 1.827  | -1.762 |
| Si        | -1.649 | 3.261  | -0.997 |
| Si        | 2.190  | -1.206 | 3.120  |
| Si        | -1.478 | -1.414 | -3.383 |
| Si        | 3.265  | -2.233 | -0.571 |
| Si        | -0.371 | 0.217  | 4.102  |
| Si        | -1.894 | 2.319  | -3.122 |
| Si        | -1.315 | 3.641  | 2.201  |
| Si        | -3.830 | 0.664  | 2.757  |
| Si        | -1.937 | -4.222 | -0.489 |
| Si        | 1.289  | -3.413 | -2.635 |
| Si        | 3.429  | -0.786 | 1.221  |
| Si        | 0.478  | -0.345 | -4.082 |
| Si        | 2.913  | 2.814  | 2.745  |
| Si        | 1.012  | 4.215  | 1.651  |
| Si        | 2.157  | 3.279  | -2.562 |
| Si        | -3.084 | 0.231  | -2.980 |
| Si        | -1.428 | -2.046 | 4.150  |
| Si        | -3.355 | -1.714 | 2.596  |
| Si        | 1.928  | 0.819  | 4.328  |
| Si        | 3.939  | -0.727 | -2.363 |
| Si        | -1.114 | -3.823 | -3.034 |
| Si        | -4.663 | 1.703  | 0.745  |
| Si        | -3.257 | 3.966  | 0.638  |
| Si        | 2.414  | -4.532 | -0.779 |
| Si        | -1.901 | 1.871  | 3.587  |
| Si        | 2.430  | -1.766 | -4.134 |
| No. (2,8) |        |        |        |
| Si        | 2.003  | 0.927  | 0.195  |
| Eu        | -0.610 | 0.423  | -1.122 |
| Si        | 1.399  | -1.352 | 0.310  |
| Si        | -1.247 | -0.553 | 1.668  |
| Si        | -0.074 | -2.387 | -1.459 |
| Si        | -2.343 | 1.687  | 0.668  |
| Si        | 0.054  | 1.787  | 1.430  |
| Eu        | 2.781  | -1.027 | -2.546 |
| Si        | -2.822 | -1.749 | 0.328  |
| Si        | 0.344  | 3.622  | -0.541 |
| Si        | 4.104  | 1.740  | 1.073  |
| Si        | 0.263  | -4.134 | 0.472  |
| Si        | -3.756 | 0.189  | -0.693 |
| Si        | 0.675  | -2.538 | 2.304  |
| Si        | 0.320  | 1.743  | -3.820 |
| Si        | 3.918  | 1.569  | -1.293 |
| Si        | -1.870 | 3.372  | -1.145 |
| Si        | 2.597  | -1.105 | 2.479  |
| Si        | -1.771 | -1.433 | -3.253 |
| Si        | 3.478  | -2.531 | 0.161  |
| Si        | -0.353 | 0.573  | 3.693  |
| Si        | -1.928 | 2.258  | -3.193 |
| Si        | -1.570 | 3.399  | 2.354  |

|           |        |        |        |
|-----------|--------|--------|--------|
| Si        | -3.353 | 0.708  | 2.678  |
| Si        | -1.856 | -3.724 | -0.578 |
| Si        | 0.811  | -3.633 | -3.331 |
| Si        | 4.860  | -0.501 | 1.727  |
| Si        | 0.192  | -0.581 | -4.184 |
| Si        | 2.220  | 2.418  | 2.366  |
| Si        | 0.692  | 4.273  | 1.725  |
| Si        | 1.714  | 2.355  | -1.961 |
| Si        | -3.263 | 0.315  | -2.978 |
| Si        | -1.064 | -1.788 | 3.756  |
| Si        | -3.316 | -1.696 | 2.694  |
| Si        | 2.005  | 0.690  | 4.041  |
| Si        | 5.100  | -0.949 | -0.596 |
| Si        | -1.656 | -3.856 | -3.054 |
| Si        | -4.802 | 1.725  | 0.972  |
| Si        | -3.360 | 3.903  | 0.686  |
| Si        | 1.980  | -4.001 | -1.257 |
| Si        | -2.152 | 2.049  | 4.291  |
| Si        | 1.649  | -2.189 | -5.069 |
| No. (3,4) |        |        |        |
| Si        | -0.108 | 1.779  | -0.830 |
| Si        | -2.376 | 1.843  | -1.887 |
| Eu        | 1.318  | -0.516 | 0.907  |
| Eu        | -1.840 | 0.087  | 0.773  |
| Si        | -0.519 | -1.262 | -1.512 |
| Si        | -3.611 | 2.541  | -0.024 |
| Si        | 0.113  | 2.216  | 1.642  |
| Si        | 1.917  | -1.129 | -1.818 |
| Si        | -3.283 | -2.828 | 0.704  |
| Si        | 1.138  | 3.949  | -0.334 |
| Si        | 4.279  | 0.799  | 0.855  |
| Si        | 1.085  | -3.639 | 0.665  |
| Si        | -4.359 | -1.156 | -0.558 |
| Si        | 1.062  | -3.128 | 2.941  |
| Si        | 0.292  | 1.954  | -3.362 |
| Si        | 3.472  | 0.666  | -1.309 |
| Si        | -1.053 | 4.214  | -1.137 |
| Si        | 2.749  | -1.557 | 3.222  |
| Si        | -1.516 | -1.657 | -3.738 |
| Si        | 3.472  | -2.530 | -0.470 |
| Si        | -0.307 | 0.521  | 3.592  |
| Si        | -1.598 | 3.514  | -3.446 |
| Si        | -2.112 | 3.015  | 1.859  |
| Si        | -3.872 | 0.244  | 2.904  |
| Si        | -1.103 | -3.147 | -0.119 |
| Si        | 1.492  | -3.524 | -2.503 |
| Si        | 4.264  | -1.472 | 1.452  |
| Si        | 0.545  | -0.397 | -3.778 |
| Si        | 2.688  | 1.917  | 2.095  |
| Si        | 1.620  | 4.041  | 2.041  |
| Si        | 2.041  | 2.429  | -1.908 |
| Si        | -2.826 | -0.444 | -2.145 |
| Si        | -0.762 | -1.698 | 3.143  |
| Si        | -3.044 | -1.907 | 2.818  |
| Si        | 2.057  | 0.551  | 3.896  |
| Si        | 4.393  | -1.283 | -2.492 |
| Si        | -0.855 | -3.600 | -2.468 |
| Si        | -4.800 | 0.720  | 0.805  |
| Si        | -2.820 | 4.799  | 0.461  |
| Si        | 2.660  | -4.768 | -0.788 |
| Si        | -2.374 | 1.796  | 3.909  |
| Si        | 2.476  | -1.950 | -4.062 |
| No. (3,5) |        |        |        |
| Si        | 0.931  | 1.644  | -0.869 |
| Si        | -1.597 | 2.216  | -0.524 |
| Eu        | 1.586  | -0.426 | 0.915  |
| Si        | -1.194 | -1.262 | 1.753  |
| Eu        | -1.101 | -0.514 | -1.165 |

|           |        |        |        |
|-----------|--------|--------|--------|
| Si        | -0.847 | 1.114  | 1.780  |
| Si        | 1.232  | 2.597  | 1.537  |
| Si        | 1.343  | -1.990 | -1.642 |
| Si        | -2.998 | -2.152 | 0.320  |
| Si        | 0.129  | 4.036  | -0.888 |
| Si        | 4.288  | 0.829  | 1.117  |
| Si        | 0.363  | -3.432 | 0.429  |
| Si        | -4.218 | -0.645 | -1.099 |
| Si        | 0.593  | -2.886 | 2.680  |
| Si        | 0.269  | 1.697  | -3.394 |
| Si        | 3.342  | 1.378  | -1.050 |
| Si        | -2.195 | 4.169  | -1.907 |
| Si        | 2.730  | -1.988 | 3.343  |
| Si        | -1.626 | -1.554 | -4.175 |
| Si        | 3.789  | -2.432 | -0.430 |
| Si        | -0.332 | 0.270  | 4.022  |
| Si        | -1.994 | 1.962  | -2.958 |
| Si        | -1.564 | 3.472  | 1.767  |
| Si        | -3.241 | 0.519  | 2.399  |
| Si        | -1.715 | -3.891 | -0.647 |
| Si        | 1.501  | -3.904 | -3.094 |
| Si        | 4.319  | -1.497 | 1.610  |
| Si        | 0.454  | -0.546 | -3.837 |
| Si        | 3.093  | 1.974  | 2.795  |
| Si        | 0.395  | 4.822  | 1.423  |
| Si        | 1.880  | 3.289  | -2.520 |
| Si        | -3.168 | -0.079 | -3.158 |
| Si        | -1.251 | -2.065 | 4.108  |
| Si        | -3.389 | -1.873 | 2.750  |
| Si        | 2.014  | 0.185  | 3.800  |
| Si        | 3.426  | -0.783 | -2.002 |
| Si        | -0.776 | -3.102 | -2.643 |
| Si        | -3.693 | 1.201  | 0.219  |
| Si        | -3.478 | 3.623  | 0.202  |
| Si        | 2.278  | -4.242 | -0.795 |
| Si        | -2.075 | 2.050  | 3.841  |
| Si        | 2.494  | -1.782 | -4.015 |
| No. (3,6) |        |        |        |
| Si        | 2.075  | 2.026  | -0.881 |
| Si        | -1.726 | 1.088  | -1.982 |
| Eu        | 1.613  | -0.466 | 0.858  |
| Si        | -0.926 | -0.971 | 2.401  |
| Si        | -0.360 | -1.780 | -1.171 |
| Eu        | -1.249 | 1.420  | 0.676  |
| Si        | 1.496  | 2.530  | 1.515  |
| Si        | 1.318  | -0.159 | -1.962 |
| Si        | -2.470 | -1.726 | 0.358  |
| Si        | -0.287 | 3.991  | -0.989 |
| Si        | 4.399  | 0.306  | 1.371  |
| Si        | 0.594  | -3.652 | 0.410  |
| Si        | -3.575 | -0.058 | -0.864 |
| Si        | 0.454  | -2.982 | 2.676  |
| Si        | -0.104 | 1.984  | -3.493 |
| Si        | 4.187  | 0.867  | -0.836 |
| Si        | -2.445 | 3.429  | -1.543 |
| Si        | 2.449  | -1.925 | 3.308  |
| Si        | -1.414 | -1.185 | -3.307 |
| Si        | 3.269  | -2.820 | -0.132 |
| Si        | 0.024  | 1.060  | 3.307  |
| Si        | -2.560 | 2.487  | -3.825 |
| Si        | -2.017 | 3.737  | 2.088  |
| Si        | -3.351 | 0.519  | 2.708  |
| Si        | -1.639 | -3.812 | -0.477 |
| Si        | 1.288  | -3.329 | -2.538 |
| Si        | 4.264  | -2.008 | 1.827  |
| Si        | 0.578  | -0.211 | -4.205 |
| Si        | 3.433  | 1.896  | 2.837  |
| Si        | 0.081  | 4.414  | 1.256  |
| Si        | 1.420  | 3.606  | -2.545 |

|           |        |        |        |
|-----------|--------|--------|--------|
| Si        | -3.481 | 0.073  | -3.354 |
| Si        | -1.396 | -2.413 | 4.218  |
| Si        | -3.214 | -1.888 | 2.651  |
| Si        | 2.128  | 0.264  | 3.948  |
| Si        | 3.479  | -1.178 | -1.756 |
| Si        | -1.053 | -3.514 | -2.852 |
| Si        | -4.354 | 1.345  | 0.820  |
| Si        | -3.679 | 3.539  | 0.457  |
| Si        | 2.224  | -4.811 | -0.875 |
| Si        | -2.039 | 2.154  | 3.846  |
| Si        | 2.560  | -1.847 | -3.950 |
| No. (3,7) |        |        |        |
| Si        | 1.635  | 1.368  | -1.095 |
| Si        | -1.341 | 0.479  | -0.633 |
| Eu        | 0.989  | -1.385 | 0.060  |
| Si        | -1.168 | -0.886 | 2.117  |
| Si        | -0.891 | -1.623 | -2.011 |
| Si        | -2.392 | 1.666  | 1.263  |
| Eu        | 0.434  | 1.335  | 1.487  |
| Si        | 1.182  | -0.619 | -2.661 |
| Si        | -2.868 | -2.002 | 0.599  |
| Si        | 0.840  | 3.680  | -0.446 |
| Si        | 3.403  | 1.269  | 0.757  |
| Si        | 0.423  | -4.342 | 0.909  |
| Si        | -3.665 | -0.155 | -0.604 |
| Si        | 0.437  | -2.670 | 2.667  |
| Si        | 0.679  | 1.645  | -3.545 |
| Si        | 4.094  | 1.649  | -1.591 |
| Si        | -1.396 | 3.119  | -0.825 |
| Si        | 2.230  | -1.202 | 3.076  |
| Si        | -1.507 | -1.751 | -4.361 |
| Si        | 3.772  | -2.343 | -0.464 |
| Si        | -0.429 | 0.270  | 4.196  |
| Si        | -1.555 | 1.870  | -2.802 |
| Si        | -1.344 | 3.732  | 2.333  |
| Si        | -4.048 | 0.787  | 2.932  |
| Si        | -1.332 | -3.446 | -0.494 |
| Si        | 1.296  | -3.285 | -2.652 |
| Si        | 3.714  | -0.971 | 1.356  |
| Si        | 0.692  | -0.400 | -5.016 |
| Si        | 2.794  | 2.661  | 2.677  |
| Si        | 1.064  | 4.382  | 1.899  |
| Si        | 2.310  | 3.229  | -2.502 |
| Si        | -2.737 | -0.220 | -2.854 |
| Si        | -1.299 | -2.057 | 4.328  |
| Si        | -3.332 | -1.611 | 2.905  |
| Si        | 1.883  | 0.856  | 4.116  |
| Si        | 3.552  | -0.738 | -2.169 |
| Si        | -1.055 | -3.880 | -3.065 |
| Si        | -4.742 | 1.745  | 0.717  |
| Si        | -3.177 | 3.920  | 0.595  |
| Si        | 2.260  | -4.142 | -0.707 |
| Si        | -2.023 | 1.946  | 3.705  |
| Si        | 2.614  | -1.876 | -4.197 |
| No. (3,8) |        |        |        |
| Si        | 0.758  | 1.665  | -0.439 |
| Si        | -1.281 | 0.764  | -1.786 |
| Eu        | 1.354  | -0.525 | 1.280  |
| Si        | -1.428 | -0.554 | 1.849  |
| Si        | -1.019 | -1.621 | -0.289 |
| Si        | -1.932 | 1.508  | 0.508  |
| Si        | 1.112  | 2.625  | 1.750  |
| Eu        | 1.089  | -0.798 | -1.863 |
| Si        | -3.260 | -2.248 | 0.367  |
| Si        | 0.333  | 3.971  | -0.840 |
| Si        | 4.163  | 0.789  | 1.177  |
| Si        | 0.391  | -3.476 | 0.601  |
| Si        | -3.434 | -0.169 | -0.879 |

|           |        |        |        |
|-----------|--------|--------|--------|
| Si        | 0.776  | -3.349 | 2.924  |
| Si        | 0.336  | 1.555  | -3.602 |
| Si        | 3.220  | 1.046  | -1.048 |
| Si        | -1.836 | 3.280  | -1.459 |
| Si        | 2.658  | -1.969 | 3.251  |
| Si        | -1.311 | -1.198 | -3.693 |
| Si        | 3.626  | -2.113 | -0.492 |
| Si        | -0.206 | 0.342  | 3.870  |
| Si        | -2.012 | 2.352  | -3.608 |
| Si        | -1.402 | 3.334  | 1.961  |
| Si        | -3.398 | 0.626  | 2.690  |
| Si        | -1.767 | -4.062 | -0.469 |
| Si        | 1.366  | -3.565 | -3.121 |
| Si        | 4.350  | -1.535 | 1.629  |
| Si        | 0.639  | -0.403 | -4.880 |
| Si        | 2.943  | 1.761  | 2.886  |
| Si        | 0.416  | 4.859  | 1.432  |
| Si        | 1.984  | 2.866  | -2.322 |
| Si        | -3.215 | 0.192  | -3.276 |
| Si        | -0.977 | -1.936 | 3.841  |
| Si        | -3.255 | -1.775 | 2.868  |
| Si        | 2.091  | 0.080  | 4.297  |
| Si        | 4.067  | -0.774 | -2.448 |
| Si        | -0.864 | -3.139 | -2.566 |
| Si        | -4.456 | 1.419  | 0.633  |
| Si        | -3.312 | 3.592  | 0.377  |
| Si        | 2.098  | -3.743 | -0.931 |
| Si        | -1.946 | 2.062  | 3.981  |
| Si        | 2.535  | -1.731 | -4.165 |
| No. (4,5) |        |        |        |
| Si        | 0.856  | 1.942  | 0.700  |
| Si        | -0.513 | 1.585  | -2.150 |
| Si        | 1.734  | -1.798 | -0.135 |
| Eu        | -0.296 | -0.433 | 1.981  |
| Eu        | -0.752 | -1.044 | -1.151 |
| Si        | -2.055 | 1.188  | 0.314  |
| Si        | 1.336  | 2.066  | 3.284  |
| Si        | 1.847  | -0.438 | -2.102 |
| Si        | -2.966 | -2.067 | 0.453  |
| Si        | 0.480  | 3.753  | -1.103 |
| Si        | 3.054  | 1.196  | 0.434  |
| Si        | 0.256  | -3.486 | 0.803  |
| Si        | -3.757 | -0.138 | -0.814 |
| Si        | 0.523  | -3.394 | 3.185  |
| Si        | 0.198  | 1.987  | -4.572 |
| Si        | 3.527  | 1.302  | -1.906 |
| Si        | -1.845 | 3.581  | -1.488 |
| Si        | 2.037  | -1.564 | 3.334  |
| Si        | -1.655 | -1.558 | -3.979 |
| Si        | 4.053  | -2.512 | -0.330 |
| Si        | -0.893 | -0.140 | 4.849  |
| Si        | -2.208 | 2.602  | -3.720 |
| Si        | -0.782 | 2.794  | 2.510  |
| Si        | -3.331 | 0.539  | 2.527  |
| Si        | -1.737 | -3.844 | -0.484 |
| Si        | 1.222  | -3.304 | -2.470 |
| Si        | 3.325  | -0.975 | 1.457  |
| Si        | 0.420  | -0.448 | -4.068 |
| Si        | 2.893  | 3.119  | 1.867  |
| Si        | 0.907  | 4.323  | 1.173  |
| Si        | 1.701  | 2.667  | -2.796 |
| Si        | -2.649 | 0.316  | -2.860 |
| Si        | -1.390 | -2.245 | 4.024  |
| Si        | -3.241 | -1.764 | 2.701  |
| Si        | 1.405  | 0.205  | 4.707  |
| Si        | 4.229  | -1.091 | -2.598 |
| Si        | -1.067 | -3.508 | -2.736 |
| Si        | -4.517 | 1.591  | 0.756  |
| Si        | -2.797 | 3.420  | 0.757  |

|           |        |        |        |
|-----------|--------|--------|--------|
| Si        | 2.242  | -4.199 | -0.489 |
| Si        | -2.177 | 1.710  | 4.163  |
| Si        | 2.382  | -1.929 | -4.028 |
| No. (4,6) |        |        |        |
| Si        | 1.067  | 0.977  | -0.272 |
| Si        | -1.121 | -0.066 | -1.475 |
| Si        | 1.988  | -1.162 | 0.283  |
| Eu        | -0.704 | -1.073 | 1.225  |
| Si        | 0.040  | -2.142 | -1.253 |
| Eu        | -1.501 | 1.655  | 0.752  |
| Si        | 0.848  | 1.080  | 2.238  |
| Si        | 1.049  | 0.147  | -2.608 |
| Si        | -3.490 | -2.262 | 0.494  |
| Si        | 0.464  | 3.548  | -0.587 |
| Si        | 3.398  | 1.053  | 0.569  |
| Si        | 0.484  | -3.796 | 0.799  |
| Si        | -3.532 | -0.144 | -0.587 |
| Si        | 0.541  | -3.051 | 3.074  |
| Si        | 0.446  | 2.109  | -4.119 |
| Si        | 4.214  | 1.616  | -1.663 |
| Si        | -1.787 | 3.895  | -1.276 |
| Si        | 2.036  | -1.181 | 2.763  |
| Si        | -1.419 | -1.381 | -3.554 |
| Si        | 3.792  | -2.386 | -0.537 |
| Si        | -0.582 | 0.493  | 4.043  |
| Si        | -1.522 | 2.027  | -2.677 |
| Si        | -1.636 | 4.196  | 2.540  |
| Si        | -3.778 | 0.882  | 2.553  |
| Si        | -1.627 | -3.658 | -0.335 |
| Si        | 1.273  | -3.484 | -2.679 |
| Si        | 4.197  | -1.046 | 1.562  |
| Si        | 0.407  | -0.340 | -4.917 |
| Si        | 2.761  | 2.456  | 2.606  |
| Si        | 0.641  | 3.578  | 1.785  |
| Si        | 1.919  | 2.453  | -2.159 |
| Si        | -3.126 | 0.165  | -2.999 |
| Si        | -1.329 | -1.851 | 4.116  |
| Si        | -3.176 | -1.386 | 2.670  |
| Si        | 1.961  | 0.712  | 4.372  |
| Si        | 3.409  | -0.643 | -2.107 |
| Si        | -1.167 | -3.692 | -2.813 |
| Si        | -4.664 | 1.757  | 0.527  |
| Si        | -3.205 | 3.883  | 0.608  |
| Si        | 2.400  | -4.453 | -0.701 |
| Si        | -2.226 | 2.165  | 3.678  |
| Si        | 2.255  | -1.649 | -3.942 |
| No. (4,7) |        |        |        |
| Si        | 1.472  | 1.161  | -0.947 |
| Si        | -1.229 | 0.635  | -1.145 |
| Si        | 1.658  | -1.048 | 0.502  |
| Eu        | -1.075 | -0.927 | 1.262  |
| Si        | -0.363 | -1.695 | -1.455 |
| Si        | -2.267 | 1.813  | 0.863  |
| Eu        | 0.432  | 1.383  | 1.650  |
| Si        | 1.642  | -0.752 | -2.339 |
| Si        | -3.604 | -2.344 | 0.444  |
| Si        | 0.727  | 3.487  | -0.465 |
| Si        | 3.375  | 1.147  | 0.746  |
| Si        | 0.530  | -3.478 | 0.690  |
| Si        | -3.558 | -0.173 | -0.636 |
| Si        | 0.563  | -3.022 | 3.032  |
| Si        | 0.527  | 1.547  | -3.376 |
| Si        | 3.907  | 1.461  | -1.585 |
| Si        | -1.582 | 3.335  | -0.989 |
| Si        | 2.038  | -1.139 | 2.942  |
| Si        | -1.444 | -1.297 | -3.545 |
| Si        | 3.454  | -2.178 | -0.542 |
| Si        | -0.401 | 0.269  | 4.415  |

|           |        |        |        |
|-----------|--------|--------|--------|
| Si        | -1.756 | 2.091  | -2.996 |
| Si        | -1.392 | 3.729  | 2.306  |
| Si        | -3.627 | 0.509  | 2.595  |
| Si        | -1.633 | -3.477 | -0.397 |
| Si        | 1.227  | -3.338 | -2.518 |
| Si        | 3.998  | -1.079 | 1.497  |
| Si        | 0.560  | -0.430 | -4.682 |
| Si        | 2.839  | 2.642  | 2.650  |
| Si        | 1.056  | 4.313  | 1.771  |
| Si        | 2.146  | 3.077  | -2.455 |
| Si        | -3.304 | 0.147  | -3.044 |
| Si        | -1.269 | -1.929 | 3.947  |
| Si        | -3.384 | -1.801 | 2.821  |
| Si        | 1.943  | 0.839  | 4.242  |
| Si        | 4.078  | -0.913 | -2.498 |
| Si        | -1.145 | -3.610 | -2.875 |
| Si        | -4.702 | 1.583  | 0.702  |
| Si        | -3.309 | 4.042  | 0.679  |
| Si        | 2.353  | -4.351 | -0.659 |
| Si        | -1.961 | 1.810  | 3.646  |
| Si        | 2.476  | -2.036 | -4.256 |
| No. (4,8) |        |        |        |
| Si        | 1.195  | 1.199  | 0.808  |
| Si        | -1.468 | 0.085  | -1.532 |
| Si        | 1.752  | -1.446 | 0.453  |
| Eu        | -0.908 | -0.886 | 1.141  |
| Si        | -0.270 | -2.028 | -1.442 |
| Si        | -2.182 | 1.665  | 0.347  |
| Si        | -0.735 | 1.691  | 2.224  |
| Eu        | 1.288  | 0.291  | -1.818 |
| Si        | -3.541 | -2.303 | 0.567  |
| Si        | 0.801  | 3.132  | -0.679 |
| Si        | 3.630  | 0.992  | 0.520  |
| Si        | 0.506  | -3.634 | 0.755  |
| Si        | -3.685 | -0.200 | -0.638 |
| Si        | 0.599  | -2.961 | 3.045  |
| Si        | 0.547  | 2.053  | -4.349 |
| Si        | 4.091  | 1.546  | -1.770 |
| Si        | -1.509 | 3.331  | -1.191 |
| Si        | 2.184  | -1.198 | 2.883  |
| Si        | -1.408 | -1.450 | -3.601 |
| Si        | 3.644  | -2.166 | -0.692 |
| Si        | -0.308 | 0.469  | 4.196  |
| Si        | -1.486 | 1.863  | -3.085 |
| Si        | -1.438 | 3.931  | 2.496  |
| Si        | -3.311 | 0.770  | 2.665  |
| Si        | -1.649 | -3.624 | -0.345 |
| Si        | 1.254  | -3.318 | -2.651 |
| Si        | 4.154  | -1.185 | 1.476  |
| Si        | 0.494  | -0.323 | -4.548 |
| Si        | 2.686  | 2.153  | 2.459  |
| Si        | 0.951  | 3.653  | 1.682  |
| Si        | 2.249  | 3.034  | -2.646 |
| Si        | -3.309 | 0.136  | -3.197 |
| Si        | -1.193 | -1.740 | 3.866  |
| Si        | -3.338 | -1.563 | 2.877  |
| Si        | 2.123  | 0.674  | 4.378  |
| Si        | 3.908  | -0.720 | -2.550 |
| Si        | -1.165 | -3.844 | -2.954 |
| Si        | -4.550 | 1.718  | 0.785  |
| Si        | -3.176 | 3.940  | 0.538  |
| Si        | 2.375  | -4.242 | -0.718 |
| Si        | -2.140 | 2.190  | 4.288  |
| Si        | 2.336  | -1.683 | -4.045 |
| No. (5,6) |        |        |        |
| Si        | 1.103  | 1.105  | -1.080 |
| Si        | -1.366 | 0.710  | -1.804 |
| Si        | 1.688  | -0.276 | 1.386  |

|           |        |        |        |
|-----------|--------|--------|--------|
| Si        | -1.502 | -1.210 | 1.984  |
| Eu        | -0.115 | -1.528 | -0.487 |
| Eu        | -0.871 | 1.367  | 1.077  |
| Si        | 1.801  | 1.949  | 2.577  |
| Si        | 1.567  | -0.734 | -2.589 |
| Si        | -3.048 | -2.176 | 0.370  |
| Si        | 0.513  | 3.496  | -0.738 |
| Si        | 3.635  | 1.427  | 0.855  |
| Si        | 0.133  | -4.275 | 0.695  |
| Si        | -3.366 | -0.084 | -0.787 |
| Si        | 0.290  | -2.785 | 2.481  |
| Si        | 0.354  | 1.545  | -3.631 |
| Si        | 3.452  | 1.262  | -1.549 |
| Si        | -1.721 | 3.234  | -1.297 |
| Si        | 2.397  | -1.726 | 3.288  |
| Si        | -1.309 | -1.145 | -3.443 |
| Si        | 3.064  | -1.801 | -0.372 |
| Si        | -0.937 | 0.101  | 4.034  |
| Si        | -2.008 | 2.296  | -3.508 |
| Si        | -1.440 | 3.772  | 2.487  |
| Si        | -3.461 | 0.480  | 2.635  |
| Si        | -1.818 | -3.922 | -0.642 |
| Si        | 1.171  | -3.192 | -2.681 |
| Si        | 4.104  | -0.895 | 1.594  |
| Si        | 0.527  | -0.455 | -4.929 |
| Si        | 3.442  | 3.527  | 2.102  |
| Si        | 0.884  | 3.964  | 1.534  |
| Si        | 1.985  | 2.950  | -2.577 |
| Si        | -3.358 | 0.165  | -3.306 |
| Si        | -1.543 | -2.293 | 4.150  |
| Si        | -3.705 | -1.956 | 2.790  |
| Si        | 1.384  | 0.263  | 4.129  |
| Si        | 4.044  | -0.972 | -2.433 |
| Si        | -1.144 | -3.406 | -2.834 |
| Si        | -4.161 | 1.530  | 0.724  |
| Si        | -2.935 | 3.561  | 0.644  |
| Si        | 2.035  | -3.882 | -0.622 |
| Si        | -2.345 | 2.005  | 4.130  |
| Si        | 2.576  | -1.991 | -4.358 |
| No. (5,7) |        |        |        |
| Si        | 0.916  | 1.075  | -1.108 |
| Si        | -1.384 | 0.821  | -1.845 |
| Si        | 2.296  | -0.409 | 0.566  |
| Si        | -1.351 | -0.871 | 2.051  |
| Eu        | -0.133 | -1.507 | -0.478 |
| Si        | -2.019 | 1.482  | 0.481  |
| Eu        | 0.490  | 1.271  | 1.772  |
| Si        | 1.648  | -0.787 | -2.530 |
| Si        | -2.897 | -2.104 | 0.539  |
| Si        | 0.604  | 3.467  | -0.465 |
| Si        | 3.840  | 1.228  | 1.128  |
| Si        | 0.208  | -4.177 | 0.777  |
| Si        | -3.501 | -0.187 | -0.819 |
| Si        | 0.350  | -2.616 | 2.527  |
| Si        | 0.374  | 1.756  | -3.676 |
| Si        | 3.506  | 1.098  | -1.310 |
| Si        | -1.624 | 3.295  | -1.294 |
| Si        | 2.262  | -1.201 | 2.852  |
| Si        | -1.381 | -1.186 | -3.408 |
| Si        | 3.488  | -2.113 | -0.456 |
| Si        | -0.477 | 0.214  | 4.266  |
| Si        | -2.026 | 2.499  | -3.574 |
| Si        | -1.417 | 3.362  | 2.095  |
| Si        | -3.322 | 0.651  | 2.664  |
| Si        | -1.806 | -3.915 | -0.488 |
| Si        | 1.164  | -3.210 | -2.687 |
| Si        | 4.437  | -1.241 | 1.661  |
| Si        | 0.514  | -0.397 | -4.707 |
| Si        | 2.829  | 2.666  | 3.008  |

|           |        |        |        |
|-----------|--------|--------|--------|
| Si        | 0.839  | 4.254  | 1.773  |
| Si        | 2.064  | 2.832  | -2.292 |
| Si        | -3.370 | 0.227  | -3.298 |
| Si        | -1.333 | -2.115 | 4.241  |
| Si        | -3.447 | -1.735 | 2.917  |
| Si        | 1.872  | 0.619  | 4.315  |
| Si        | 4.133  | -0.969 | -2.555 |
| Si        | -1.167 | -3.402 | -2.726 |
| Si        | -4.432 | 1.486  | 0.709  |
| Si        | -3.256 | 3.717  | 0.457  |
| Si        | 2.014  | -3.943 | -0.670 |
| Si        | -2.003 | 2.070  | 4.063  |
| Si        | 2.495  | -2.002 | -4.483 |
| No. (5,8) |        |        |        |
| Si        | 1.550  | 1.293  | -0.053 |
| Si        | -0.621 | 1.490  | -1.512 |
| Si        | 2.435  | -0.908 | 0.357  |
| Si        | -1.608 | -0.824 | 2.262  |
| Eu        | -0.474 | -1.117 | -0.193 |
| Si        | -2.089 | 1.269  | 0.571  |
| Si        | 0.141  | 0.939  | 1.972  |
| Eu        | 1.239  | -0.584 | -2.270 |
| Si        | -3.072 | -2.178 | 0.712  |
| Si        | 0.568  | 3.658  | -0.669 |
| Si        | 4.004  | 1.171  | 0.860  |
| Si        | 0.197  | -4.010 | 0.724  |
| Si        | -3.656 | -0.349 | -0.639 |
| Si        | 0.128  | -2.589 | 2.592  |
| Si        | 0.313  | 1.730  | -4.052 |
| Si        | 3.664  | 1.232  | -1.703 |
| Si        | -1.699 | 3.608  | -1.380 |
| Si        | 2.047  | -1.291 | 2.684  |
| Si        | -1.359 | -1.432 | -3.961 |
| Si        | 4.128  | -2.295 | -0.651 |
| Si        | -0.693 | 0.397  | 4.239  |
| Si        | -2.037 | 2.381  | -3.453 |
| Si        | -1.230 | 2.969  | 2.214  |
| Si        | -3.472 | 0.701  | 2.721  |
| Si        | -1.850 | -3.931 | -0.474 |
| Si        | 1.398  | -3.547 | -2.935 |
| Si        | 4.411  | -1.257 | 1.661  |
| Si        | 0.542  | -0.473 | -5.095 |
| Si        | 2.242  | 2.236  | 2.150  |
| Si        | 0.851  | 4.263  | 1.703  |
| Si        | 1.827  | 2.522  | -2.399 |
| Si        | -2.406 | 0.089  | -2.596 |
| Si        | -1.405 | -2.003 | 4.384  |
| Si        | -3.748 | -1.763 | 3.106  |
| Si        | 1.766  | 0.665  | 3.973  |
| Si        | 4.245  | -0.912 | -2.793 |
| Si        | -0.845 | -3.128 | -2.499 |
| Si        | -4.547 | 1.491  | 0.694  |
| Si        | -3.054 | 3.527  | 0.608  |
| Si        | 1.972  | -3.310 | -0.707 |
| Si        | -2.341 | 2.210  | 4.278  |
| Si        | 2.535  | -1.939 | -4.431 |
| No. (6,7) |        |        |        |
| Si        | 3.071  | 2.694  | -1.203 |
| Si        | -2.822 | -0.242 | -2.330 |
| Si        | 1.203  | -1.023 | 1.282  |
| Si        | -1.615 | -0.132 | 2.506  |

|           |        |        |        |
|-----------|--------|--------|--------|
| Si        | -1.099 | -1.970 | -2.015 |
| Eu        | -0.867 | 0.804  | -0.255 |
| Eu        | 1.488  | 1.566  | 2.873  |
| Si        | 0.900  | -0.543 | -2.279 |
| Si        | -2.927 | -1.635 | 0.896  |
| Si        | 0.028  | 3.837  | -1.059 |
| Si        | 3.727  | 1.043  | 0.836  |
| Si        | 0.440  | -3.298 | 0.578  |
| Si        | -4.374 | -0.413 | -0.468 |
| Si        | 0.599  | -3.128 | 2.913  |
| Si        | 0.523  | 1.693  | -3.278 |
| Si        | 4.828  | 1.127  | -1.255 |
| Si        | -2.198 | 3.630  | -1.546 |
| Si        | 2.130  | -1.495 | 3.613  |
| Si        | -1.115 | -1.200 | -4.555 |
| Si        | 2.983  | -2.231 | -0.076 |
| Si        | -0.312 | -0.153 | 4.846  |
| Si        | -1.804 | 1.813  | -3.084 |
| Si        | -1.129 | 2.796  | 2.095  |
| Si        | -3.781 | 0.635  | 3.496  |
| Si        | -1.756 | -3.324 | -0.194 |
| Si        | 1.128  | -3.193 | -2.753 |
| Si        | 3.727  | -1.150 | 1.881  |
| Si        | 0.973  | -0.103 | -4.740 |
| Si        | 3.089  | 3.382  | 1.029  |
| Si        | 0.690  | 3.926  | 1.139  |
| Si        | 1.654  | 3.681  | -2.748 |
| Si        | -3.013 | 0.302  | -4.625 |
| Si        | -1.276 | -2.071 | 3.915  |
| Si        | -3.542 | -1.817 | 3.232  |
| Si        | 1.940  | 0.024  | 5.382  |
| Si        | 3.261  | -0.569 | -1.699 |
| Si        | -1.026 | -3.499 | -3.859 |
| Si        | -3.703 | 1.159  | 1.139  |
| Si        | -2.958 | 3.258  | 0.685  |
| Si        | 2.081  | -4.325 | -0.802 |
| Si        | -1.725 | 1.731  | 4.236  |
| Si        | 2.574  | -1.585 | -3.752 |
| No. (6,8) |        |        |        |
| Si        | 2.538  | 1.450  | 0.301  |
| Si        | -1.530 | 0.830  | -2.130 |
| Si        | 1.946  | -0.743 | 0.946  |
| Si        | -1.066 | -1.010 | 2.237  |
| Si        | -0.331 | -2.111 | 0.142  |
| Eu        | -0.961 | 1.393  | 0.588  |
| Si        | 1.499  | 2.568  | 2.138  |
| Eu        | 1.008  | -0.466 | -1.737 |
| Si        | -2.816 | -1.982 | 0.402  |
| Si        | 0.072  | 3.866  | -0.952 |
| Si        | 3.918  | 0.610  | 2.044  |
| Si        | 0.207  | -4.492 | 0.634  |
| Si        | -3.429 | -0.100 | -0.926 |
| Si        | 0.217  | -3.090 | 2.613  |
| Si        | 0.002  | 1.679  | -3.935 |
| Si        | 3.573  | 1.684  | -1.857 |
| Si        | -2.038 | 3.266  | -1.622 |
| Si        | 2.314  | -1.925 | 2.926  |
| Si        | -1.442 | -1.138 | -3.711 |
| Si        | 3.551  | -1.923 | -0.459 |
| Si        | -0.083 | 0.926  | 3.312  |
| Si        | -2.369 | 2.346  | -3.836 |
| Si        | -1.910 | 3.714  | 1.979  |

|           |        |        |        |
|-----------|--------|--------|--------|
| Si        | -3.250 | 0.597  | 2.523  |
| Si        | -1.906 | -3.993 | -0.572 |
| Si        | 1.294  | -3.523 | -3.085 |
| Si        | 4.527  | -1.778 | 1.823  |
| Si        | 0.426  | -0.387 | -5.027 |
| Si        | 3.347  | 2.166  | 3.794  |
| Si        | 0.219  | 4.375  | 1.312  |
| Si        | 1.404  | 2.516  | -2.297 |
| Si        | -3.535 | 0.089  | -3.445 |
| Si        | -1.432 | -2.328 | 4.214  |
| Si        | -3.328 | -1.808 | 2.741  |
| Si        | 2.048  | 0.192  | 3.972  |
| Si        | 3.887  | -0.688 | -2.500 |
| Si        | -0.870 | -2.935 | -2.466 |
| Si        | -4.271 | 1.389  | 0.626  |
| Si        | -3.412 | 3.522  | 0.235  |
| Si        | 1.820  | -3.408 | -0.851 |
| Si        | -2.077 | 2.193  | 3.864  |
| Si        | 2.236  | -1.542 | -3.960 |
| No. (7,8) |        |        |        |
| Si        | 3.226  | 1.426  | -0.226 |
| Si        | -1.369 | 0.838  | -1.727 |
| Si        | 3.451  | -0.861 | 0.473  |
| Si        | -1.916 | -1.053 | 1.079  |
| Si        | 0.123  | -2.016 | 0.241  |
| Si        | -2.180 | 1.339  | 0.523  |
| Eu        | 0.468  | 0.579  | 1.583  |
| Eu        | 1.281  | -0.371 | -1.755 |
| Si        | -3.858 | -2.278 | 0.315  |
| Si        | 0.834  | 2.769  | -0.612 |
| Si        | 3.670  | 1.384  | 2.051  |
| Si        | 0.520  | -4.338 | 0.890  |
| Si        | -3.732 | -0.047 | -0.833 |
| Si        | 0.779  | -2.575 | 2.612  |
| Si        | 0.119  | 1.641  | -3.806 |
| Si        | 3.957  | 1.407  | -2.488 |
| Si        | -1.509 | 3.264  | -1.203 |
| Si        | 2.439  | -1.015 | 3.308  |
| Si        | -1.528 | -1.032 | -3.410 |
| Si        | 3.967  | -2.382 | -1.221 |
| Si        | -0.695 | 0.398  | 4.328  |
| Si        | -2.101 | 2.525  | -3.367 |
| Si        | -1.354 | 3.137  | 2.041  |
| Si        | -3.627 | 0.684  | 2.595  |
| Si        | -1.727 | -3.628 | -0.124 |
| Si        | 1.029  | -3.858 | -3.195 |
| Si        | 4.668  | -0.768 | 2.539  |
| Si        | 0.163  | -0.418 | -4.922 |
| Si        | 2.142  | 2.589  | 3.214  |
| Si        | 0.856  | 3.771  | 1.576  |
| Si        | 1.906  | 2.600  | -2.729 |
| Si        | -3.479 | 0.393  | -3.219 |
| Si        | -1.236 | -1.594 | 3.382  |
| Si        | -3.667 | -1.705 | 2.779  |
| Si        | 1.583  | 0.740  | 4.696  |
| Si        | 3.842  | -0.988 | -3.197 |
| Si        | -0.804 | -2.825 | -2.142 |
| Si        | -4.590 | 1.668  | 0.655  |
| Si        | -3.142 | 3.779  | 0.501  |
| Si        | 1.872  | -3.455 | -1.016 |
| Si        | -2.271 | 2.062  | 3.947  |
| Si        | 1.887  | -1.783 | -4.142 |
